# Supplementary material
Source: PubMed Central journal article supplement (PMC5295362)
Supplement: jo6b02897_si_001.pdf [file jo6b02897_si_001.pdf]

## Supporting Information

# Synergistic Photoredox/Nickel Coupling of Acyl Chlorides with Secondary Alkyltrifluoroborates: Dialkyl ketone Synthesis

Javad Amani and Gary A. Molander\*

Roy and Diana Vagelos Laboratories, Department of Chemistry, University of Pennsylvania, 231  
South 34th Street, Philadelphia, Pennsylvania 19104-6323, United States

### Contents:

|                  |        |
|------------------|--------|
| NMR Spectra..... | S1-S60 |
|------------------|--------|

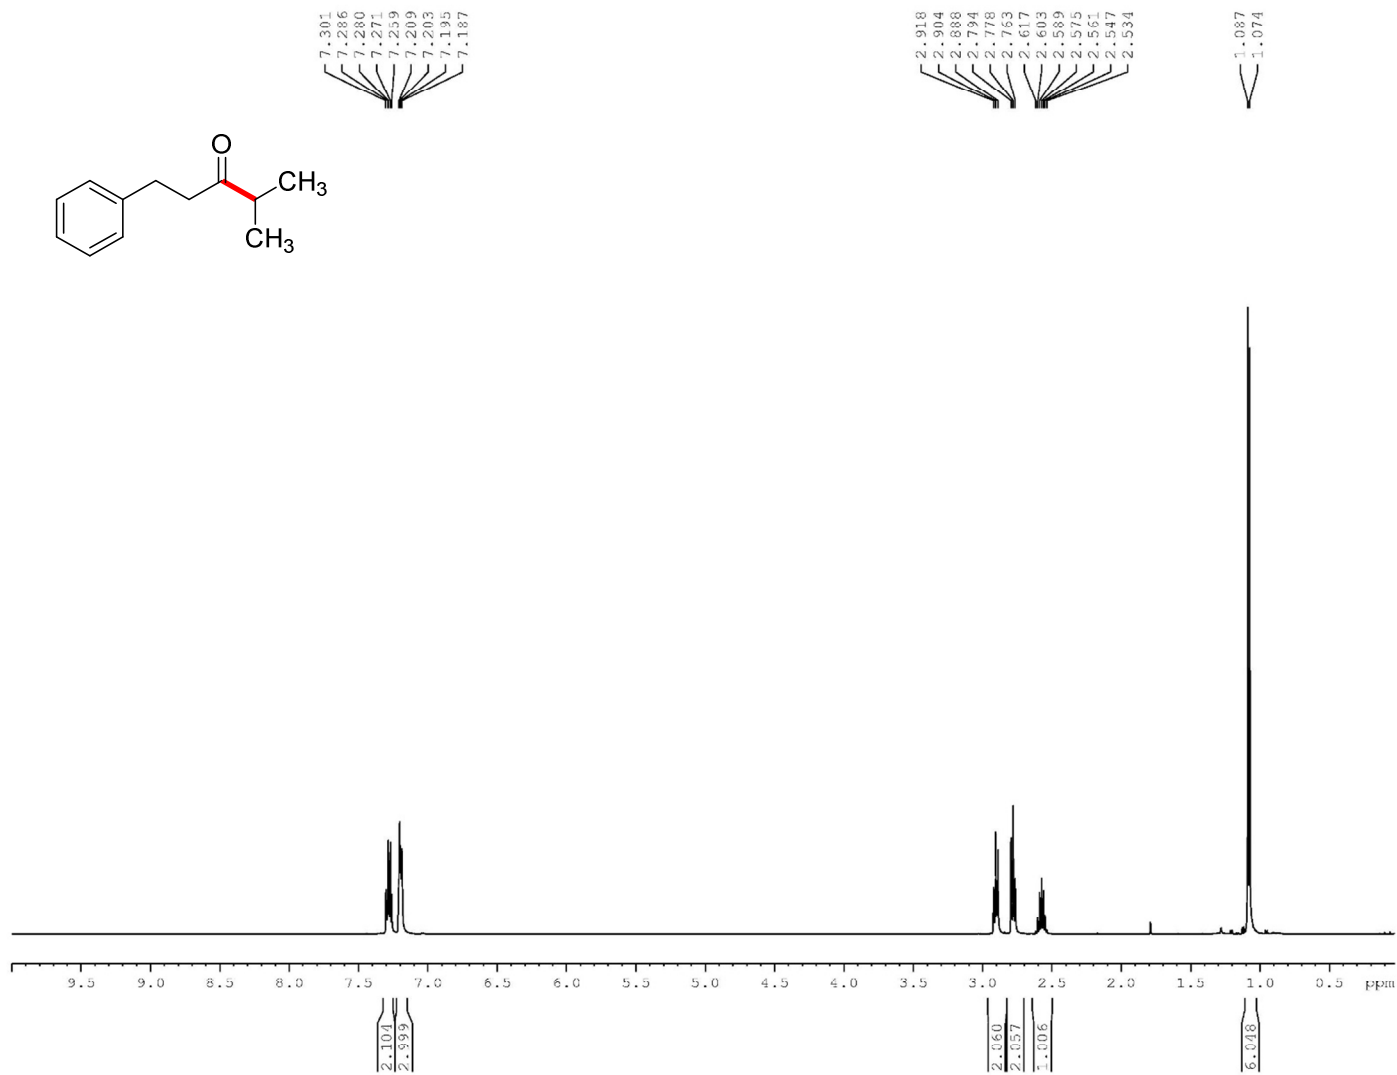

<sup>1</sup>H NMR (500 MHz, CDCl<sub>3</sub>) Spectrum of 4-Methyl-1-phenylpentan-3-one (1a)

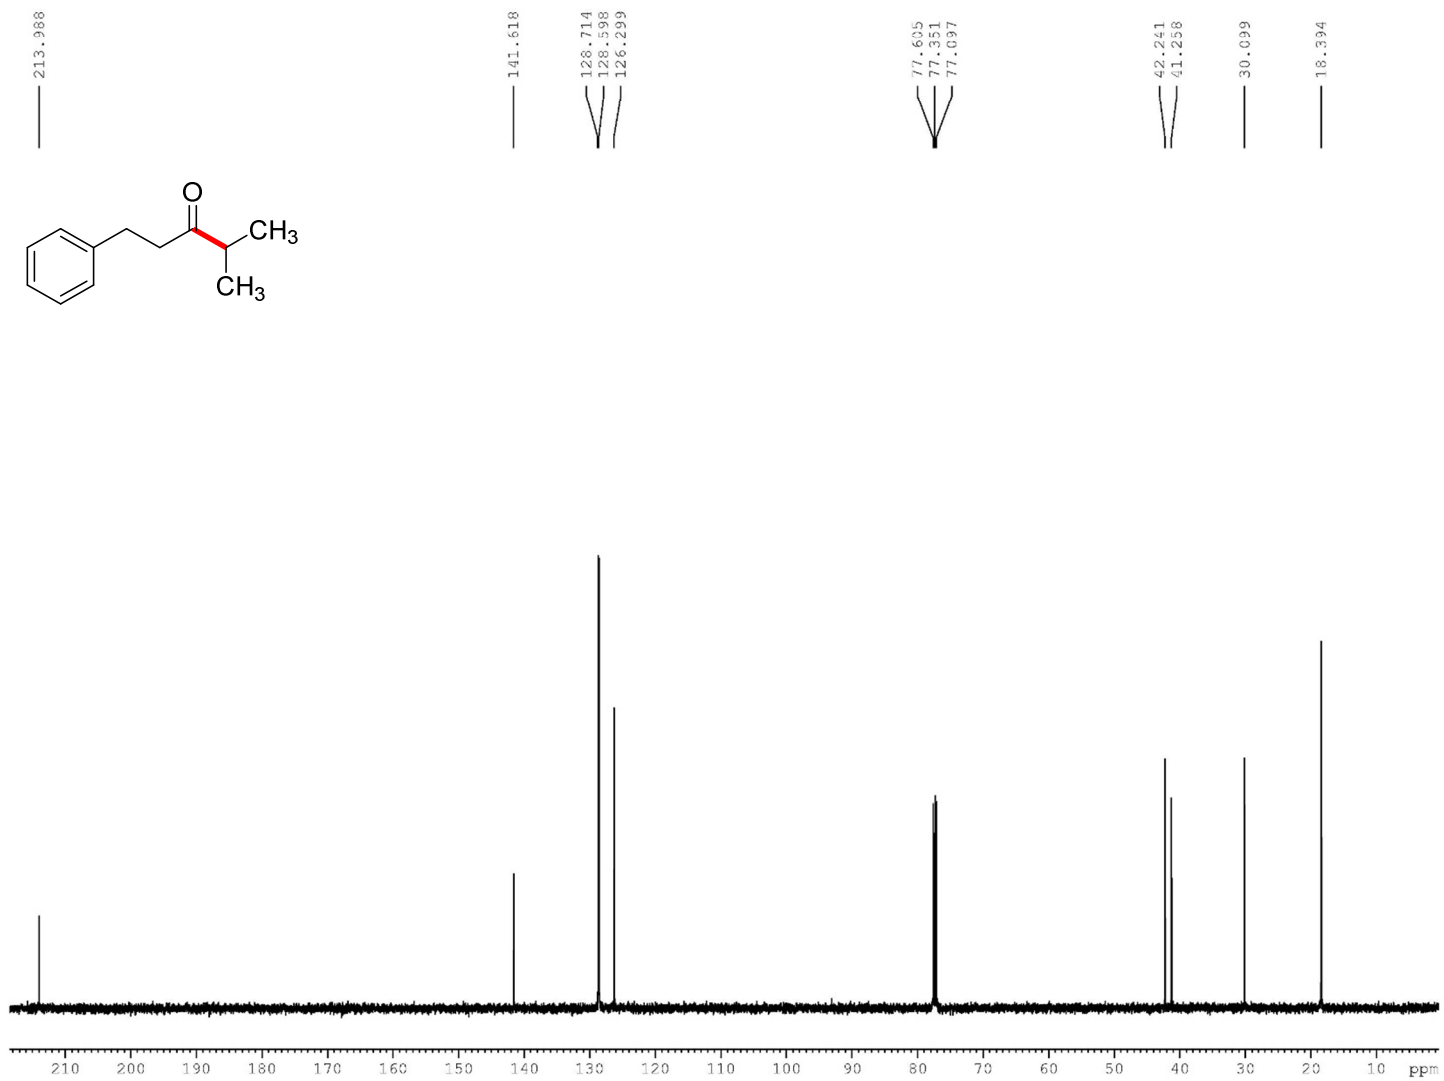

<sup>13</sup>C NMR (125.8 MHz, CDCl<sub>3</sub>) Spectrum of 4-Methyl-1-phenylpentan-3-one (1a)

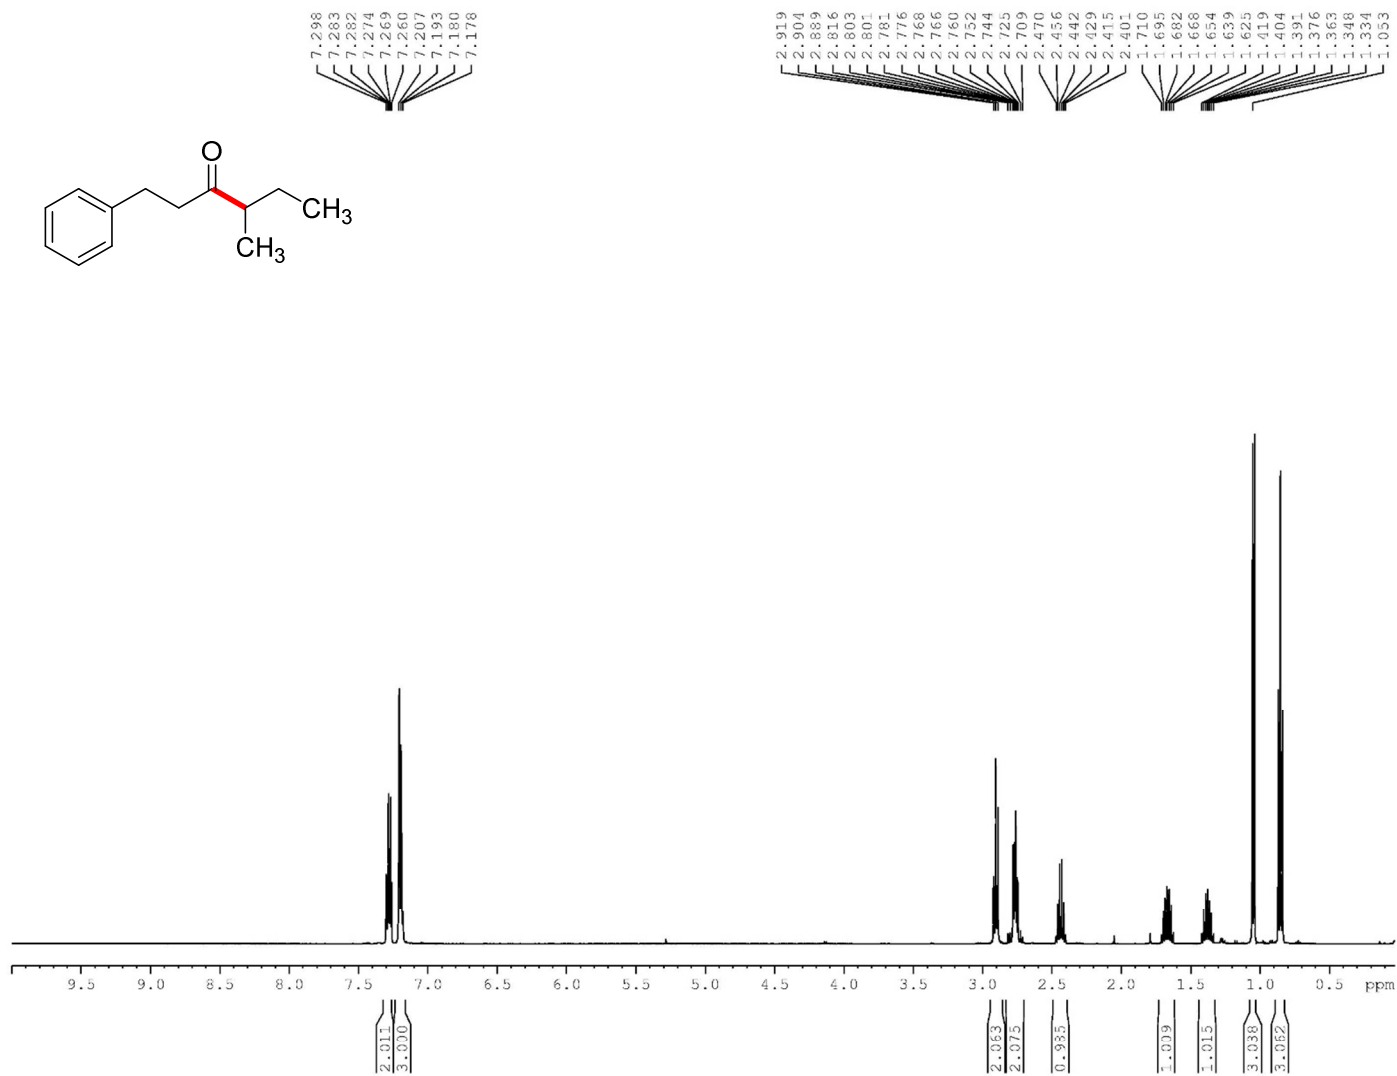

**<sup>1</sup>H NMR (500 MHz, CDCl<sub>3</sub>) Spectrum of 4-Methyl-1-phenylhexan-3-one (1b)**



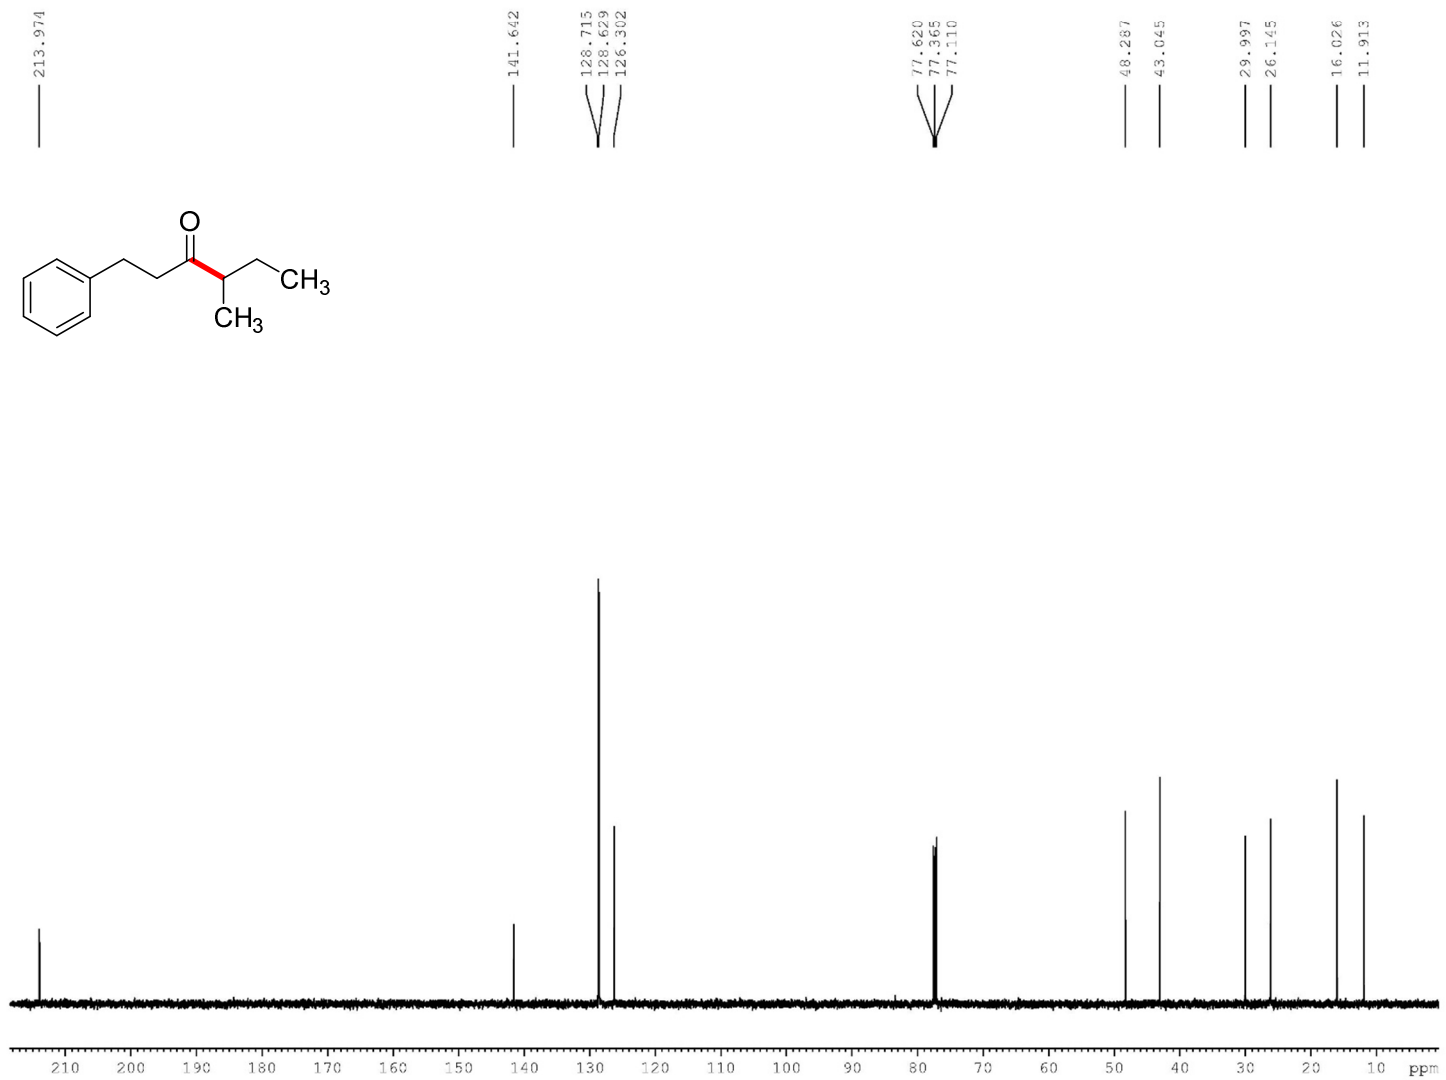

<sup>13</sup>C NMR (125.8 MHz, CDCl<sub>3</sub>) Spectrum of 4-Methyl-1-phenylhexan-3-one (1b)

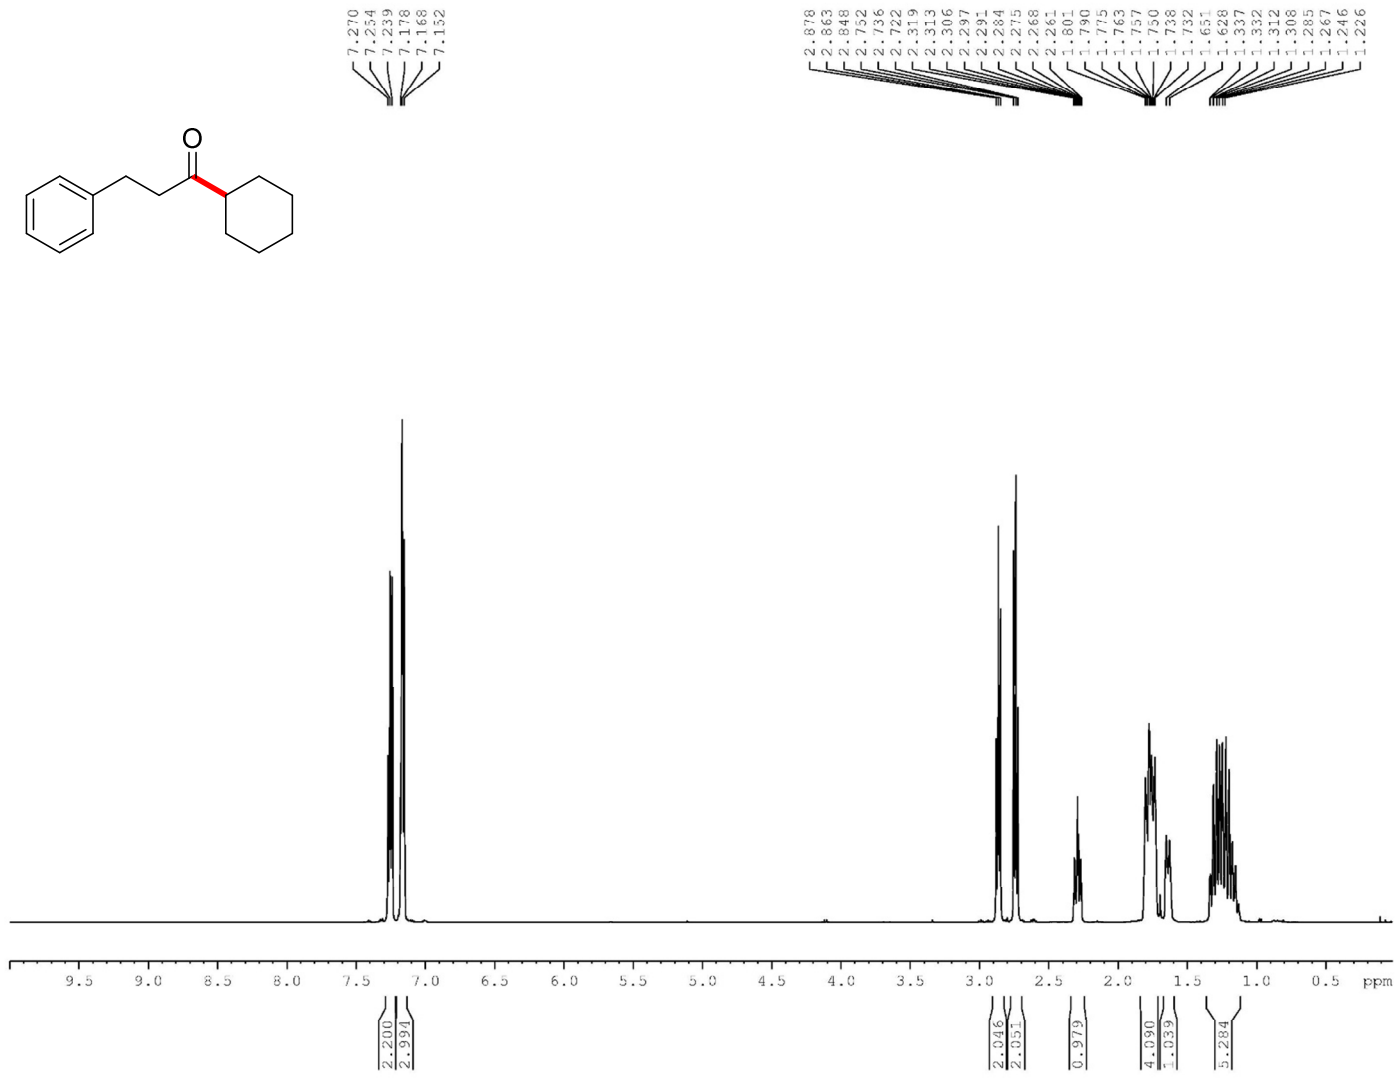

**<sup>1</sup>H NMR (500 MHz, CDCl<sub>3</sub>) Spectrum of 1-Cyclohexyl-3-phenylpropan-1-one (1c)**

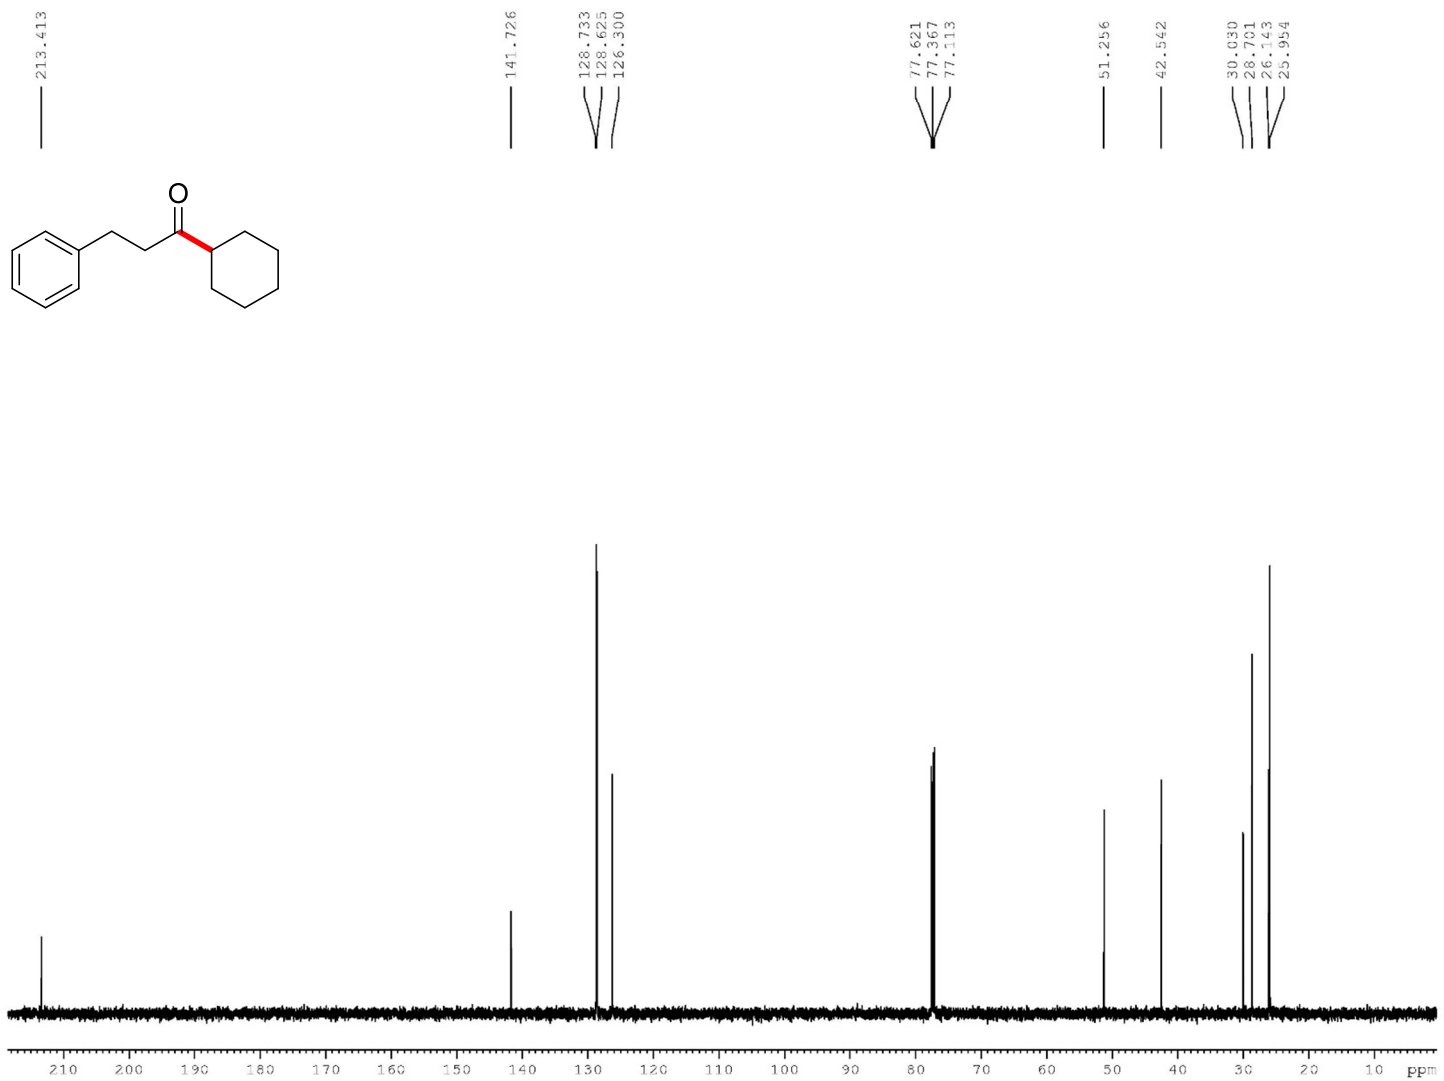

<sup>13</sup>C NMR (125.8 MHz, CDCl<sub>3</sub>) Spectrum of 1-Cyclohexyl-3-phenylpropan-1-one (1c)

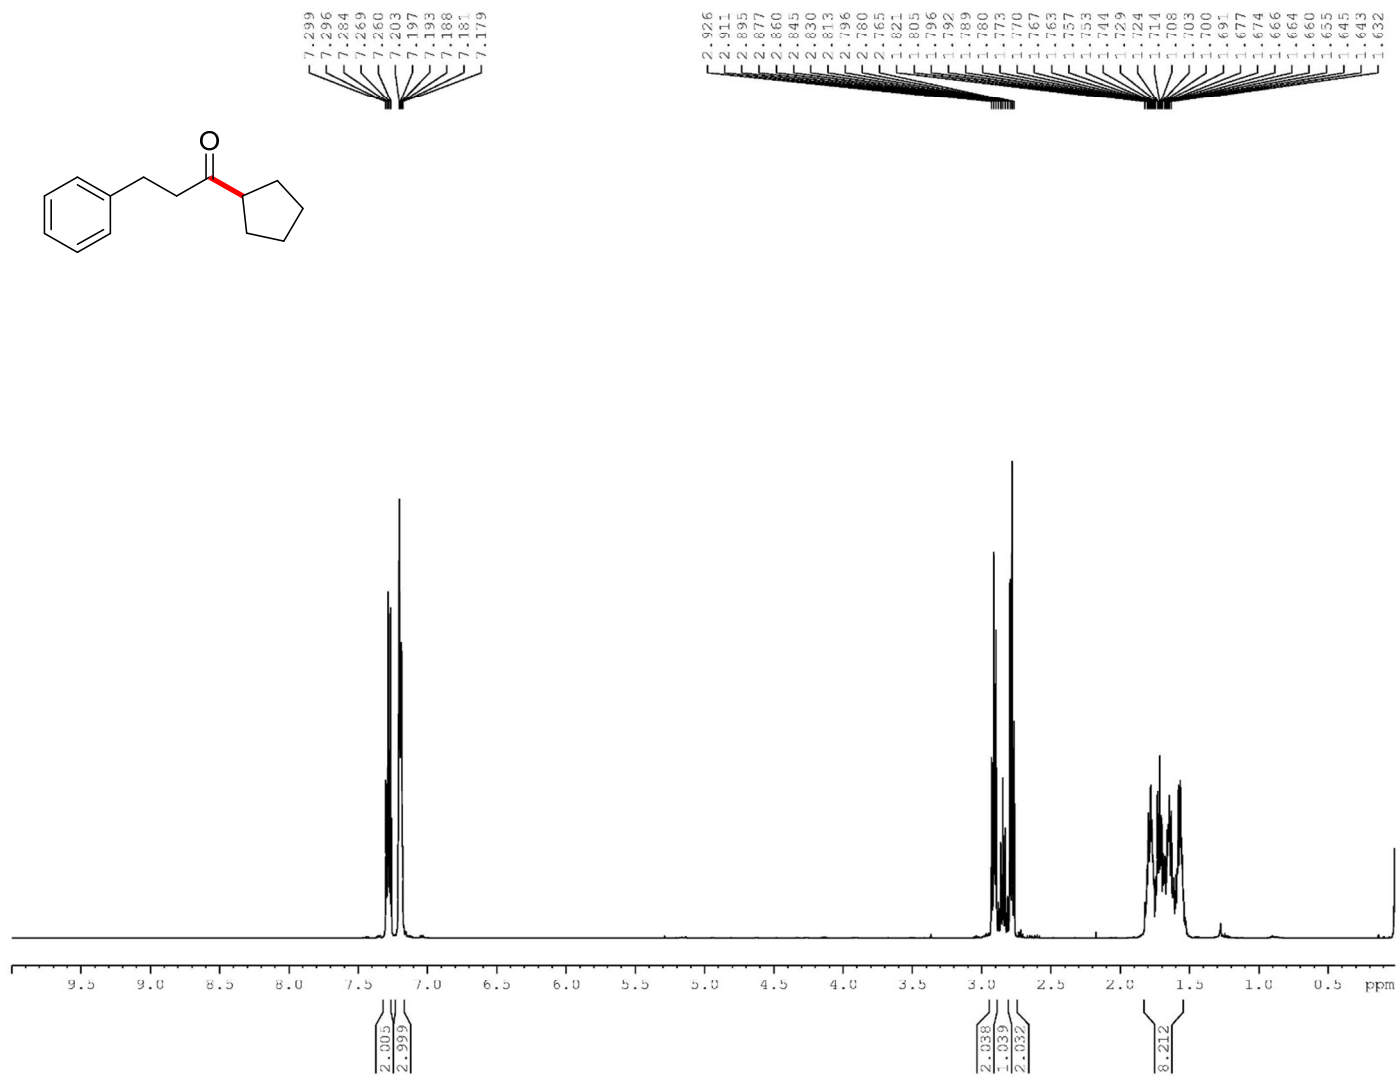

**<sup>1</sup>H NMR (500 MHz, CDCl<sub>3</sub>) Spectrum of 1-Cyclopentyl-3-phenylpropan-1-one (1d)**

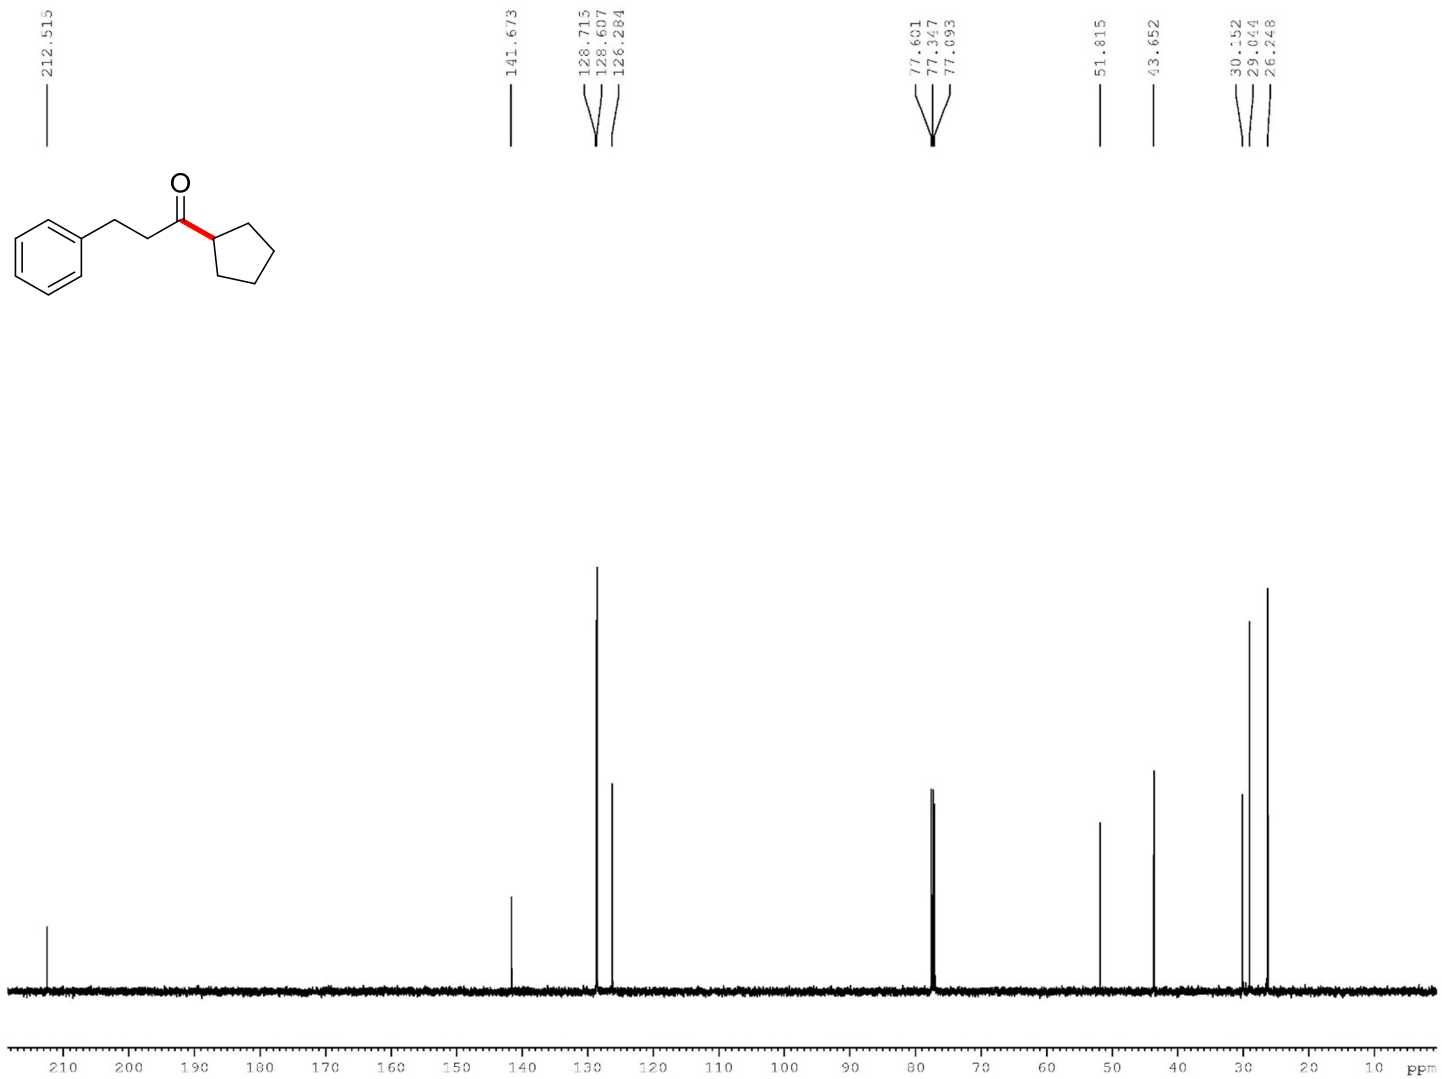

<sup>13</sup>C NMR (125.8 MHz, CDCl<sub>3</sub>) Spectrum of 1-Cyclopentyl-3-phenylpropan-1-one (1d)

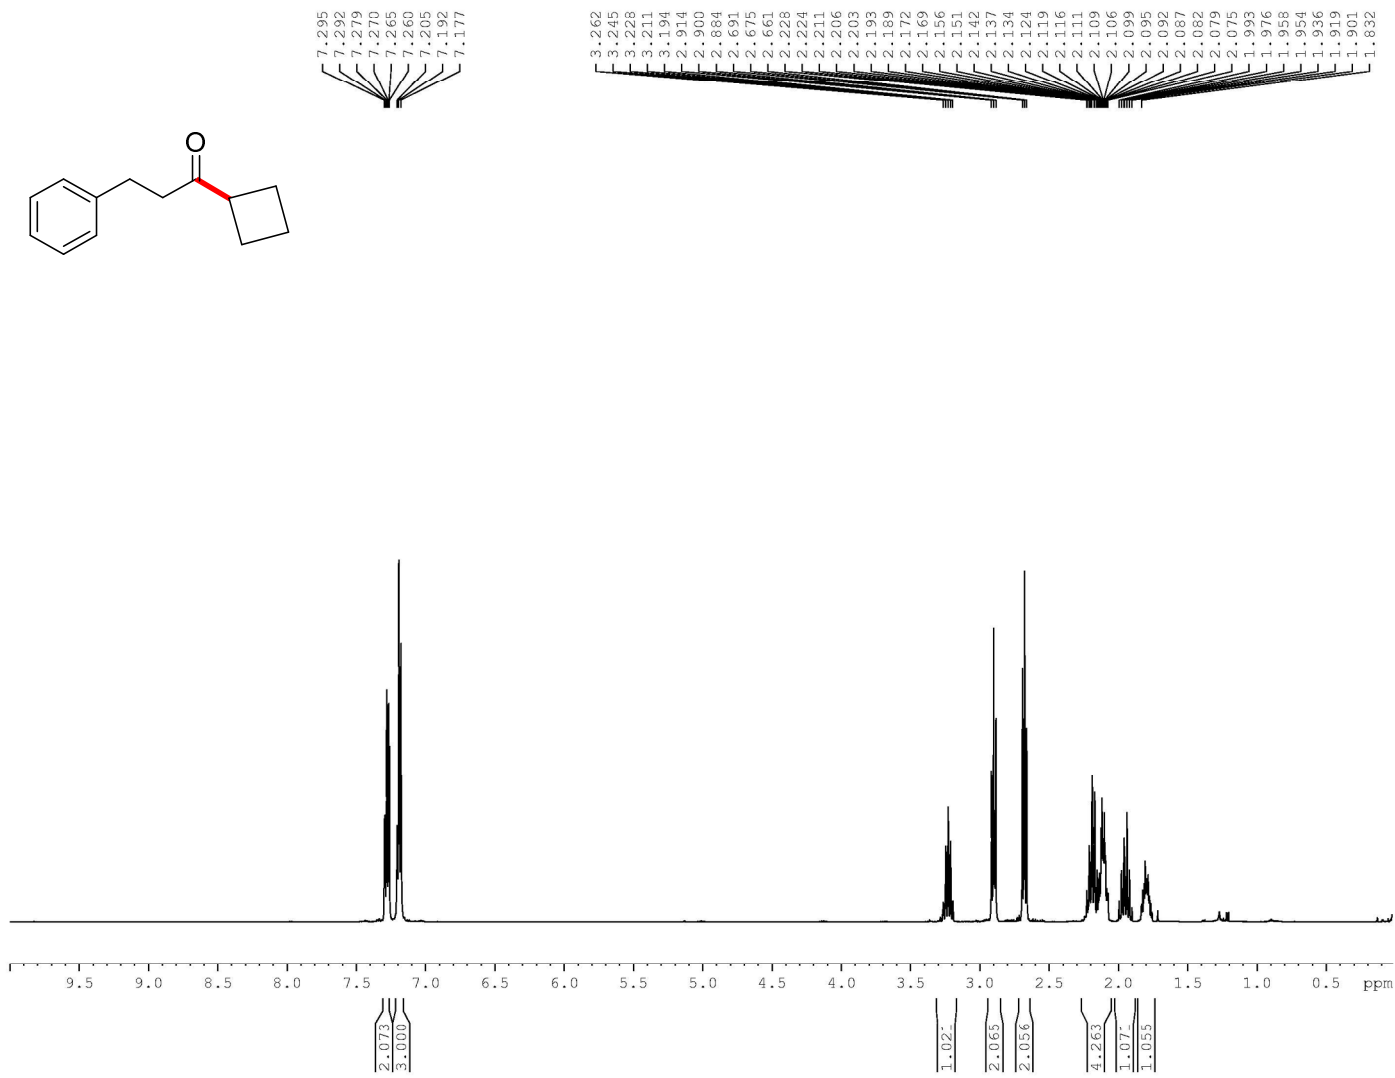

<sup>1</sup>H NMR (500 MHz, CDCl<sub>3</sub>) Spectrum of 1-Cyclobutyl-3-phenylpropan-1-one (1e)

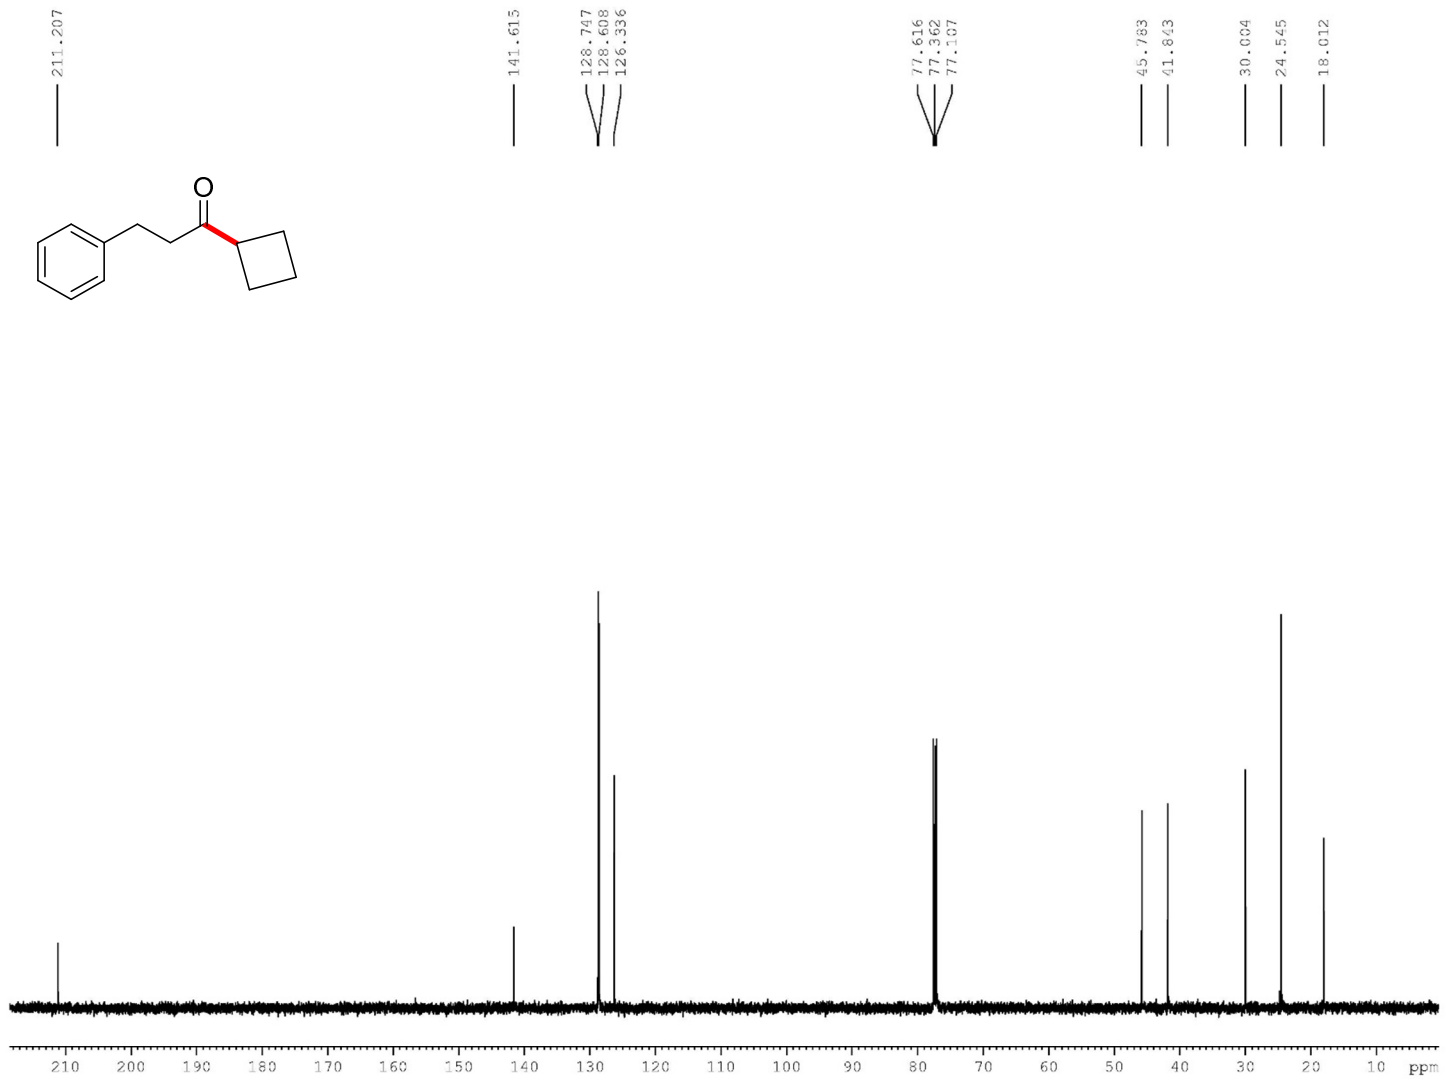

<sup>13</sup>C NMR (125.8 MHz, CDCl<sub>3</sub>) Spectrum of 1-Cyclobutyl-3-phenylpropan-1-one (1e)

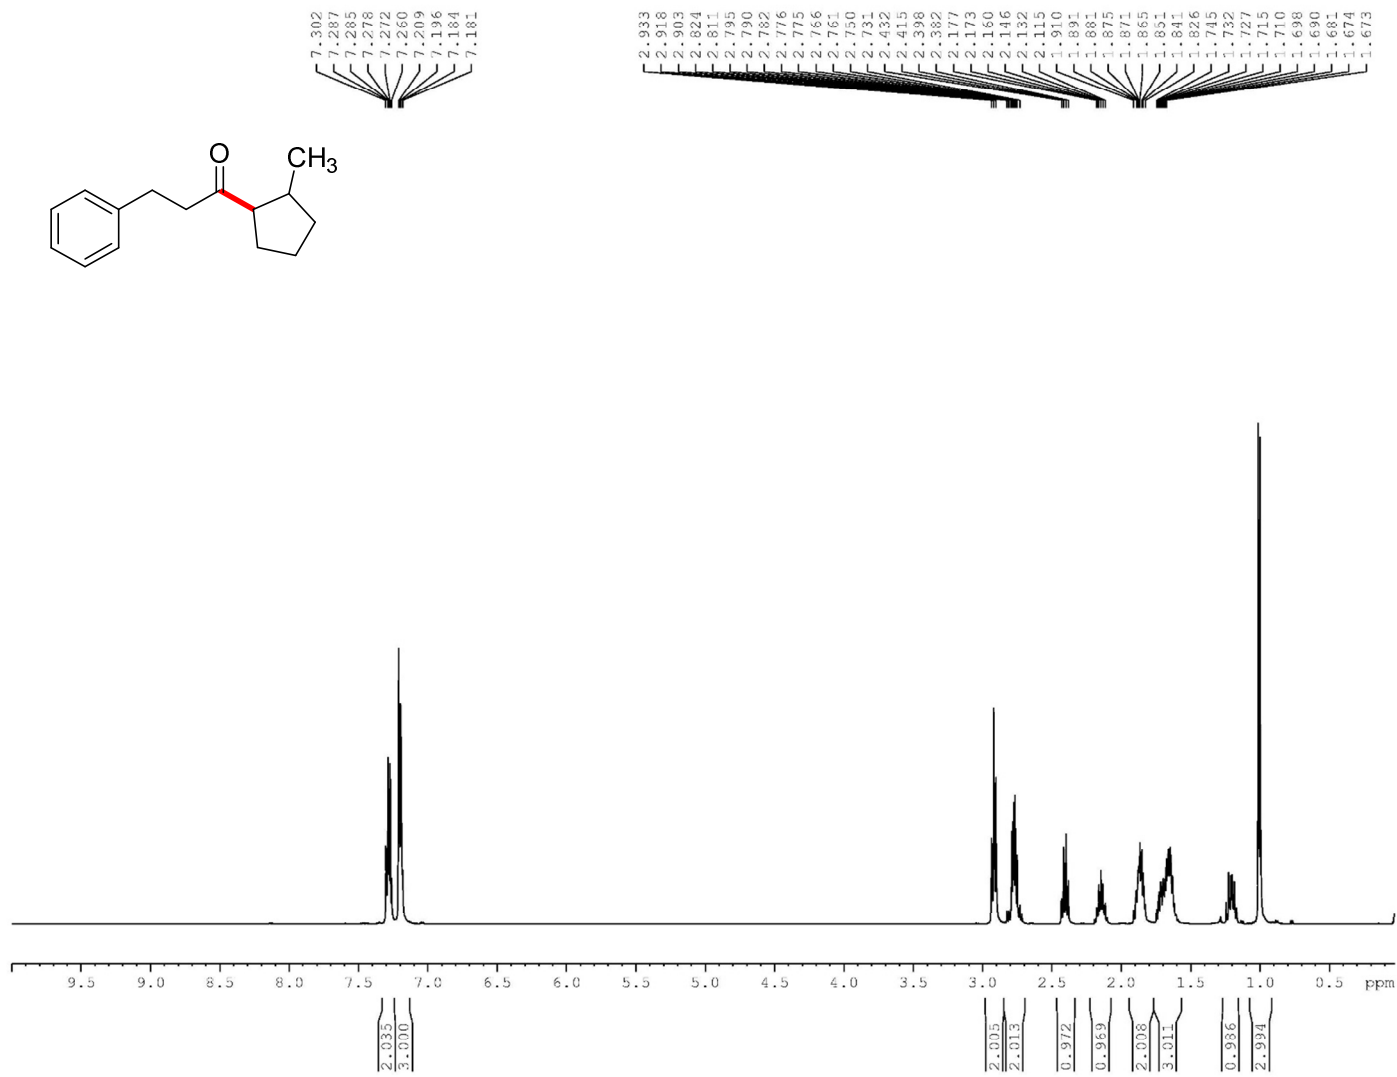

**<sup>1</sup>H NMR (500 MHz, CDCl<sub>3</sub>) Spectrum of 1-(2-Methylcyclopentyl)-3-phenylpropan-1-one (1f)**



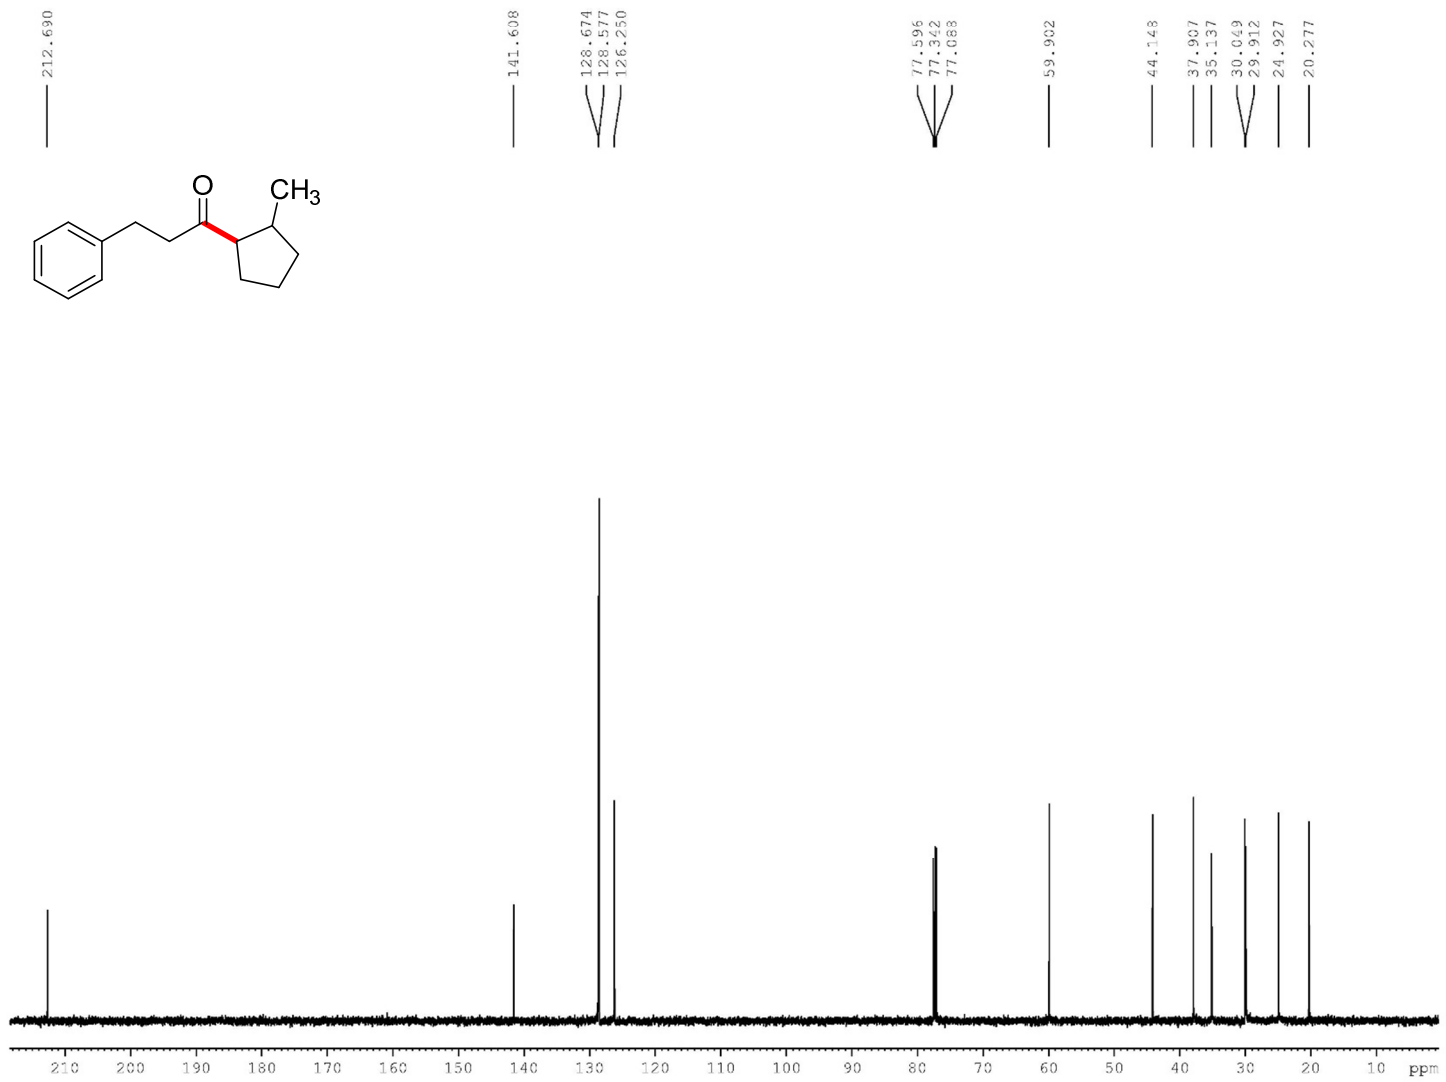

<sup>13</sup>C NMR (125.8 MHz, CDCl<sub>3</sub>) Spectrum of 1-(2-Methylcyclopentyl)-3-phenylpropan-1-one (1f)

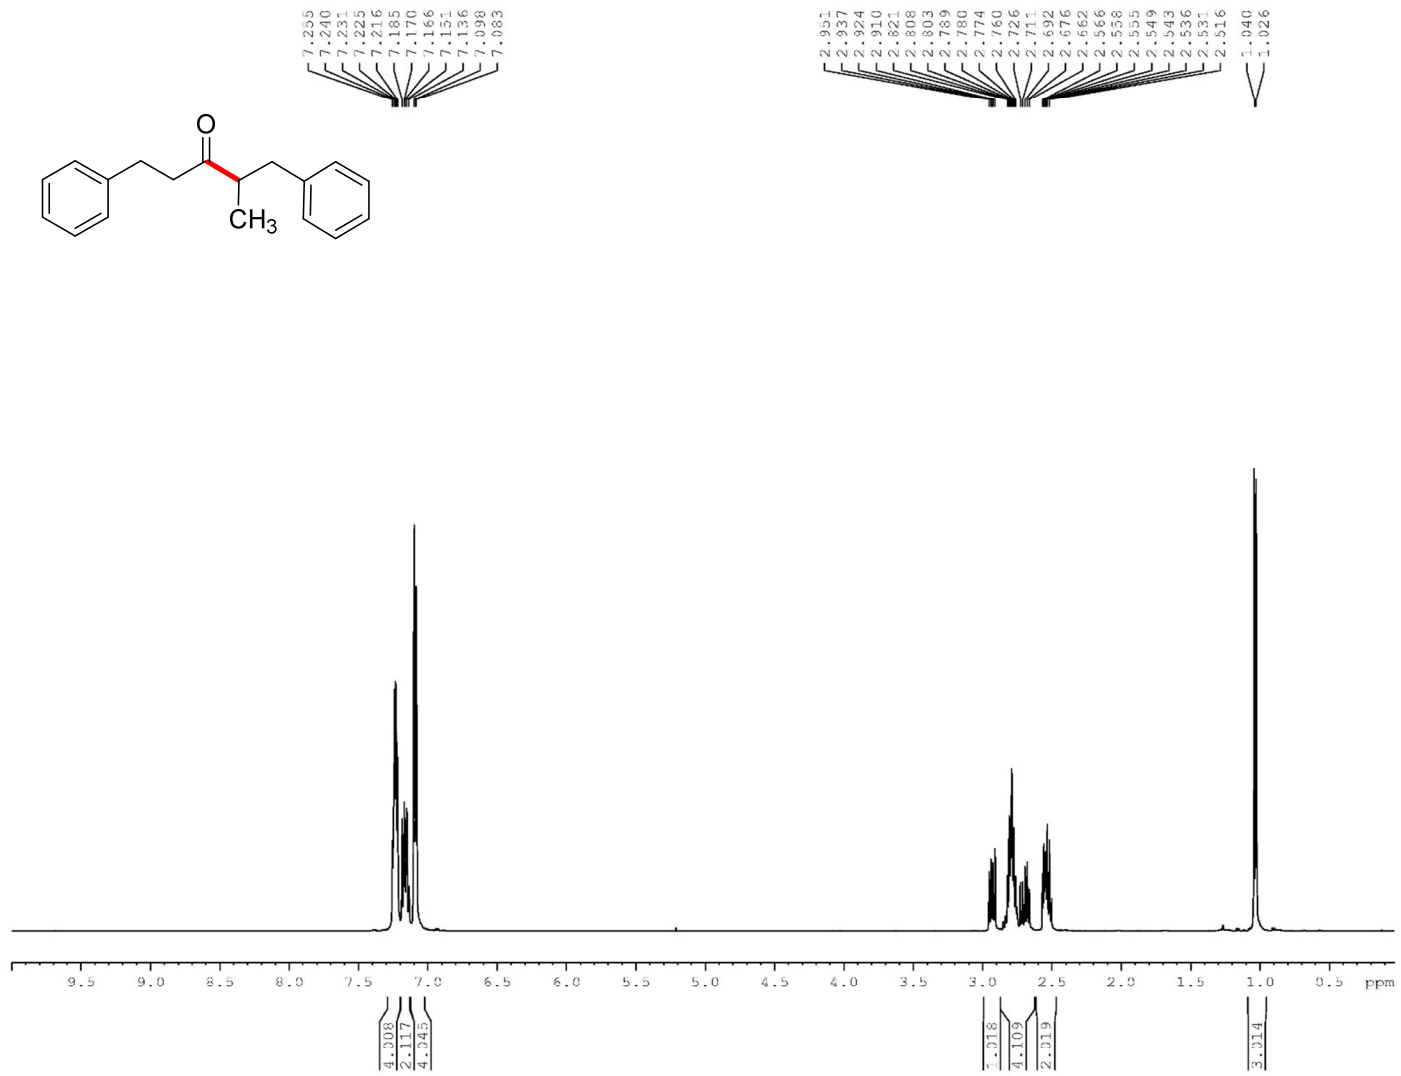

<sup>1</sup>H NMR (500 MHz, CDCl<sub>3</sub>) Spectrum of 2-Methyl-1,5-diphenylpentan-3-one (1g)

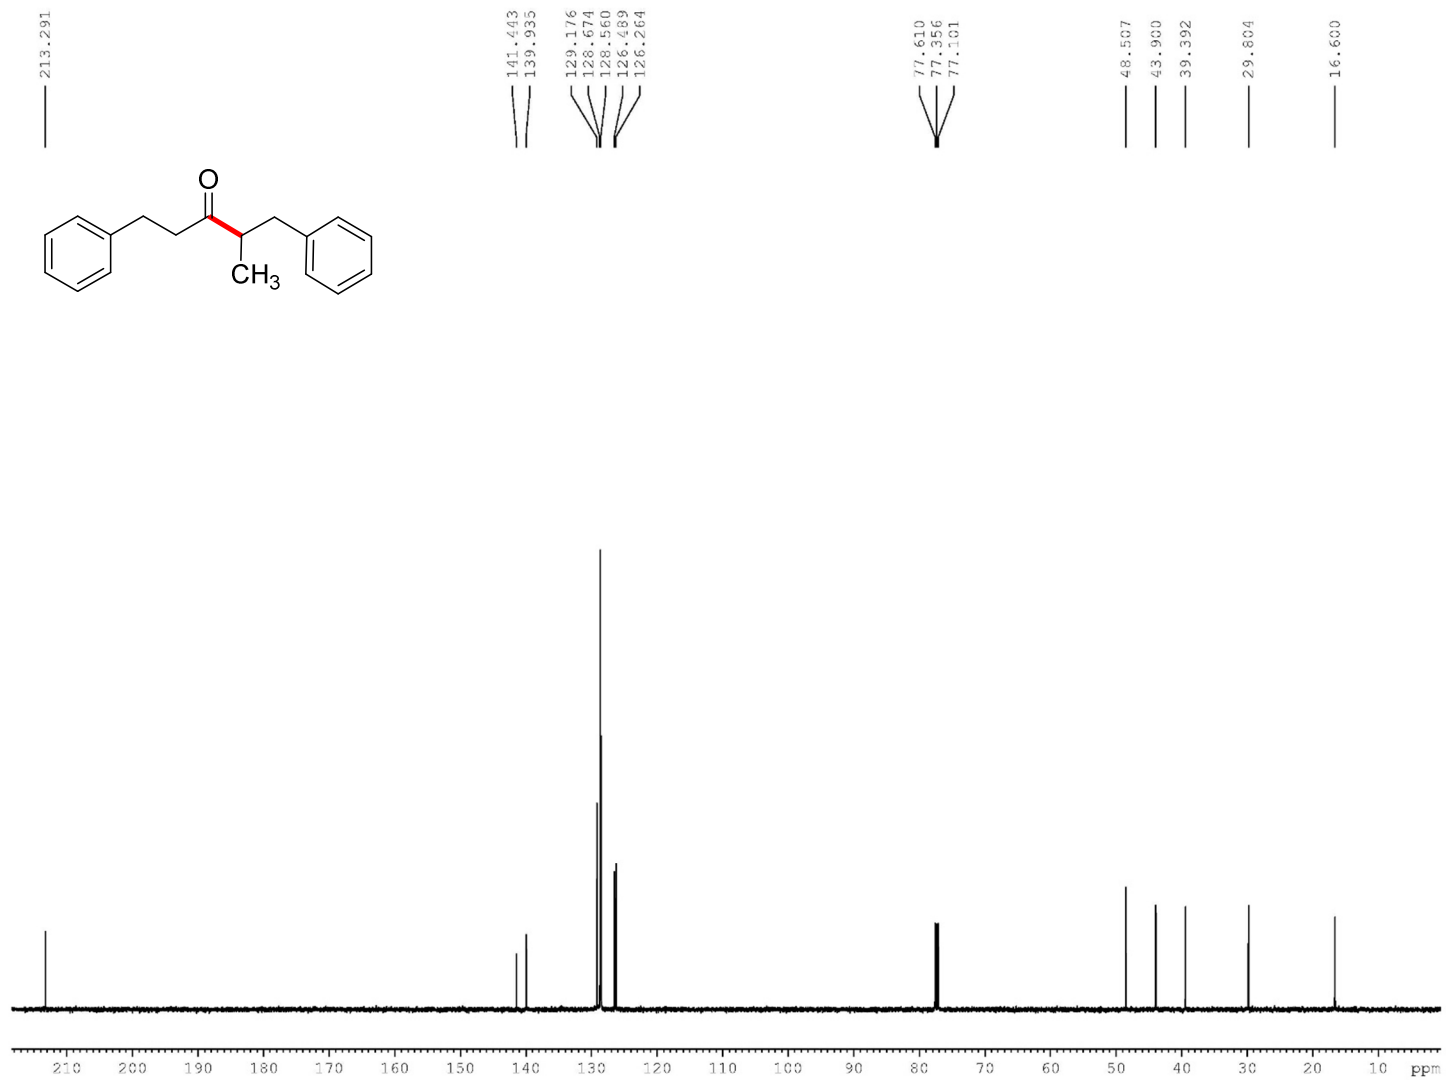

<sup>13</sup>C NMR (125.8 MHz, CDCl<sub>3</sub>) Spectrum of 2-Methyl-1,5-diphenylpentan-3-one (1g)

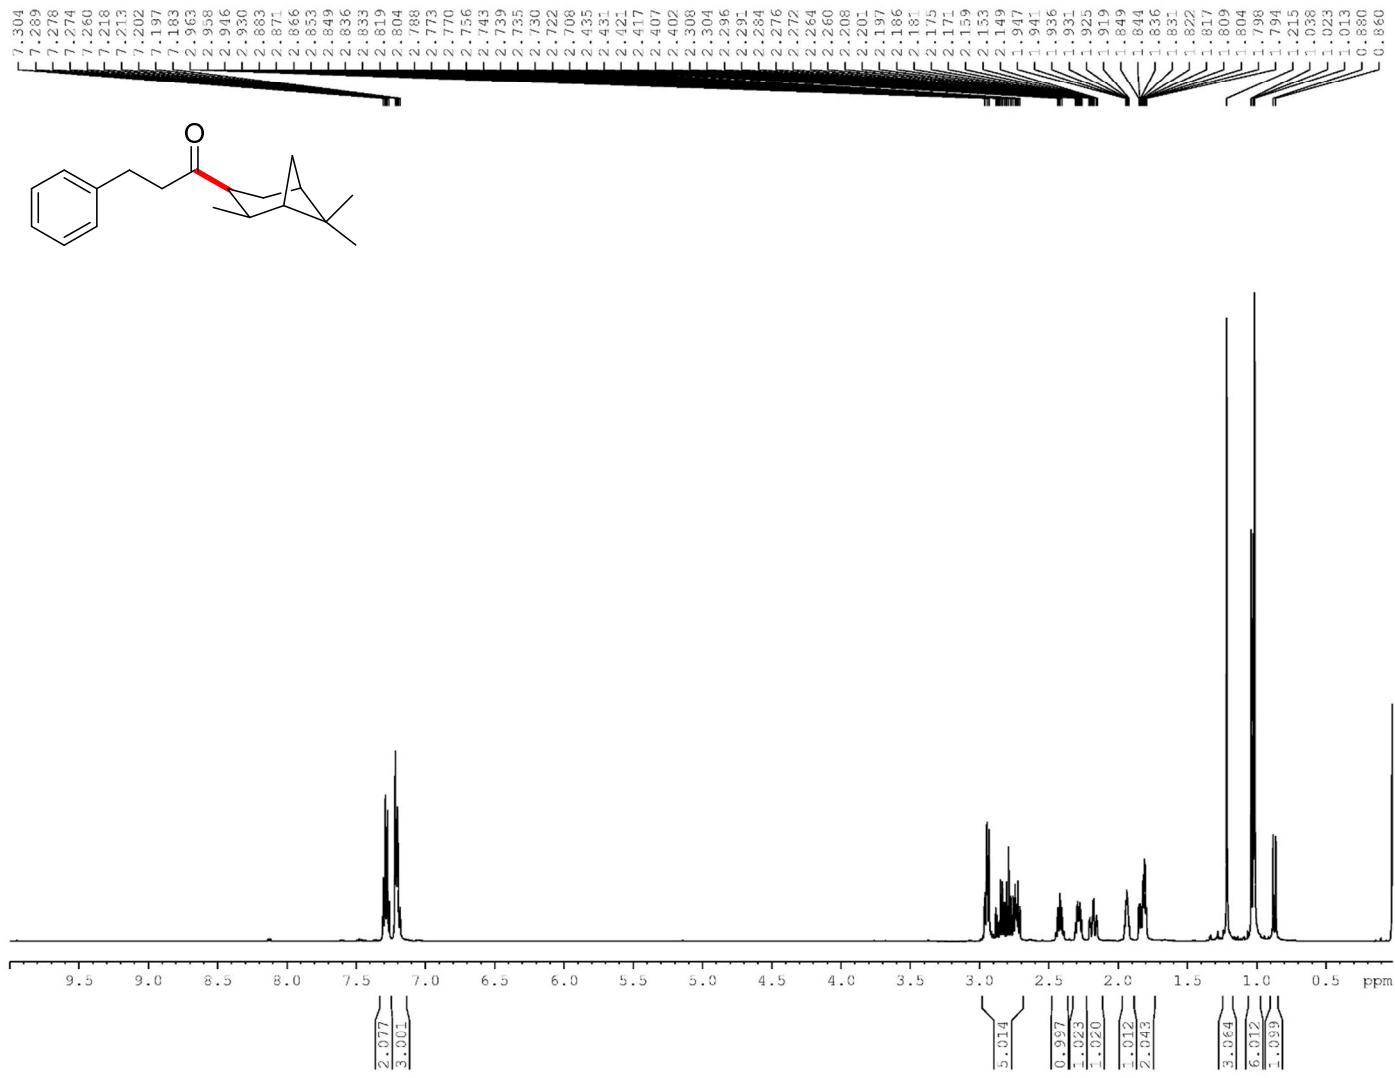

<sup>1</sup>H NMR (500 MHz, CDCl<sub>3</sub>) Spectrum of 3-Phenyl-1-(2,6,6-trimethylbicyclo[3.1.1]heptan-3-yl)propan-1-one (1h)

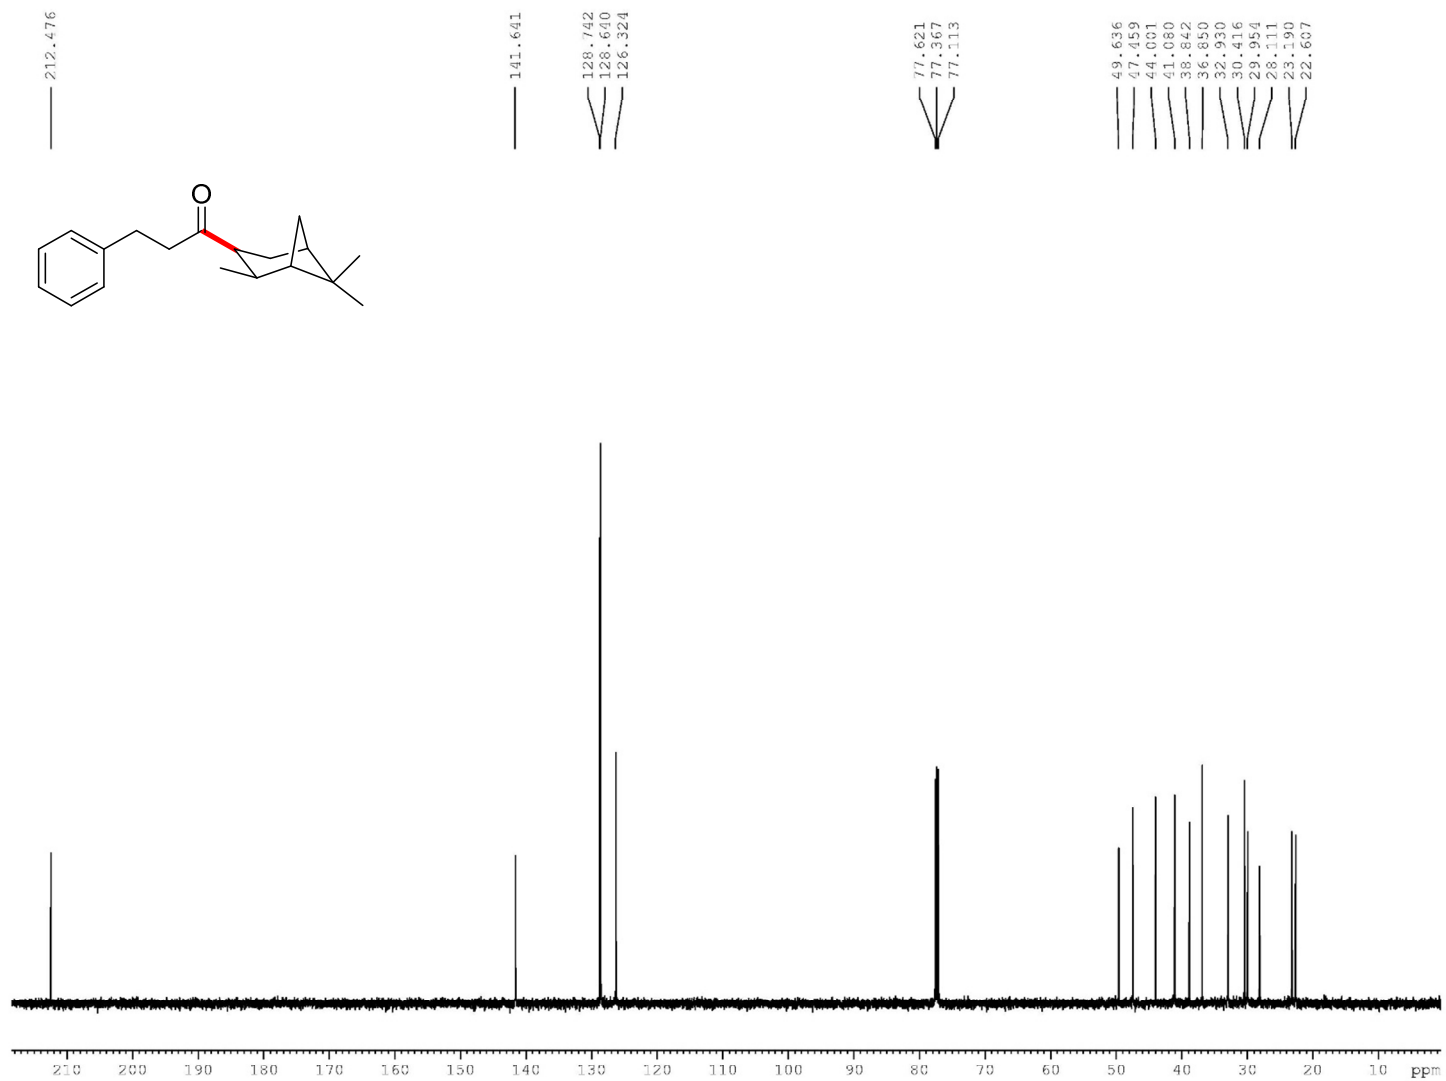

<sup>13</sup>C NMR (125.8 MHz, CDCl<sub>3</sub>) Spectrum of 3-Phenyl-1-(2,6,6-trimethylbicyclo[3.1.1]heptan-3-yl)propan-1-one (1h)

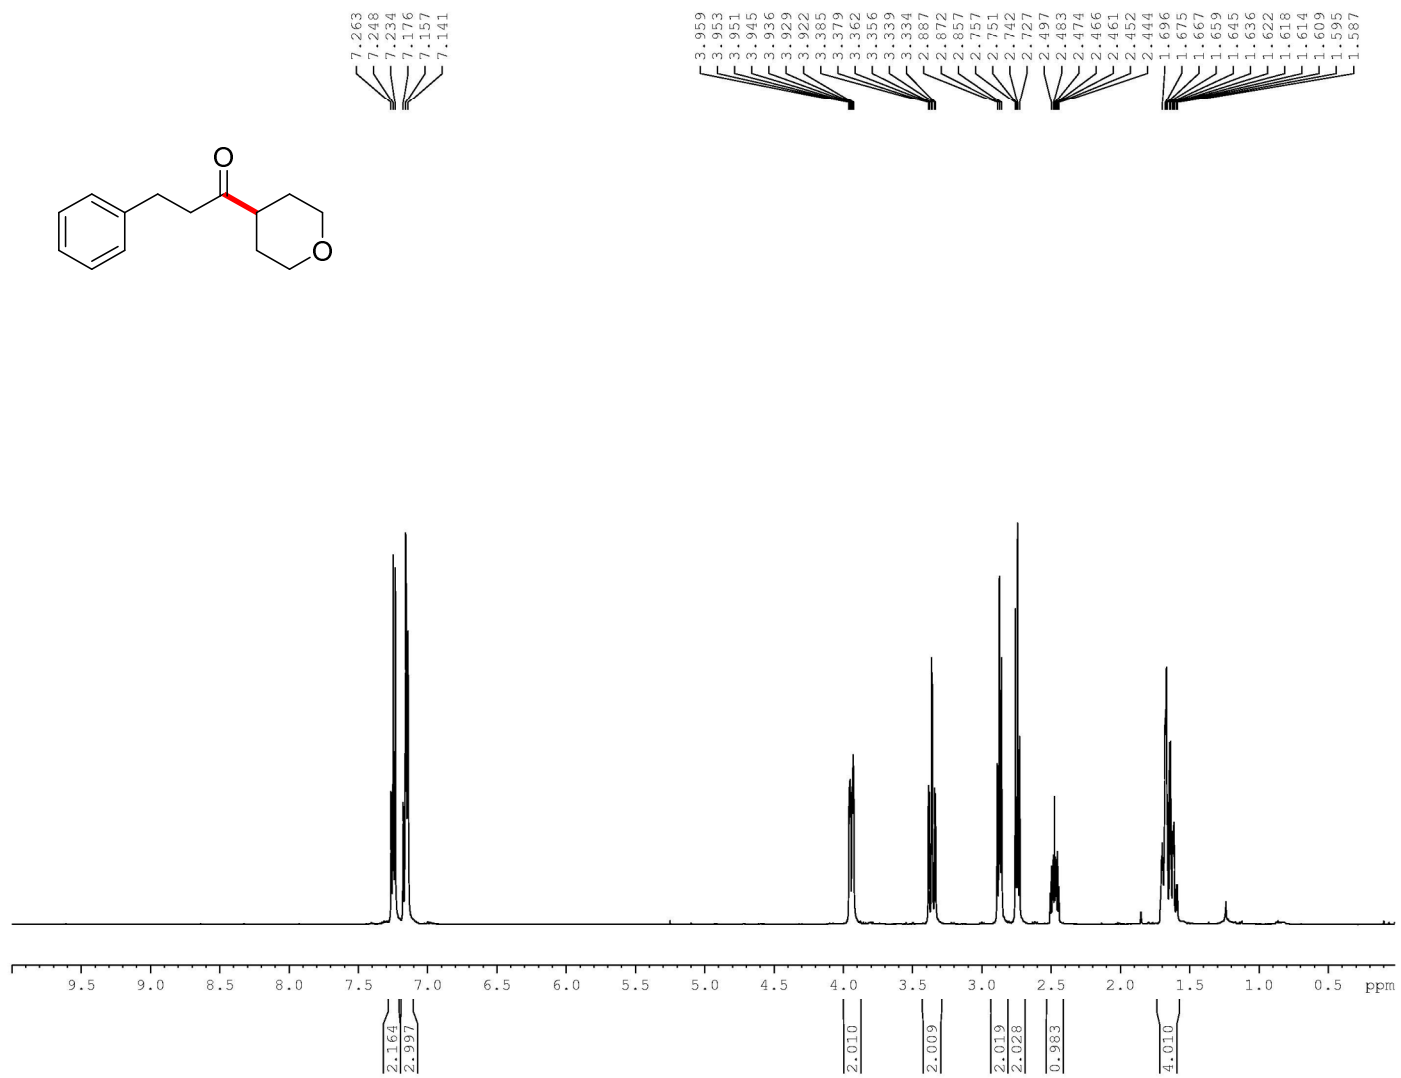

**<sup>1</sup>H NMR (500 MHz, CDCl<sub>3</sub>) Spectrum of 3-Phenyl-1-(tetrahydro-2H-pyran-4-yl)propan-1-one (1i)**

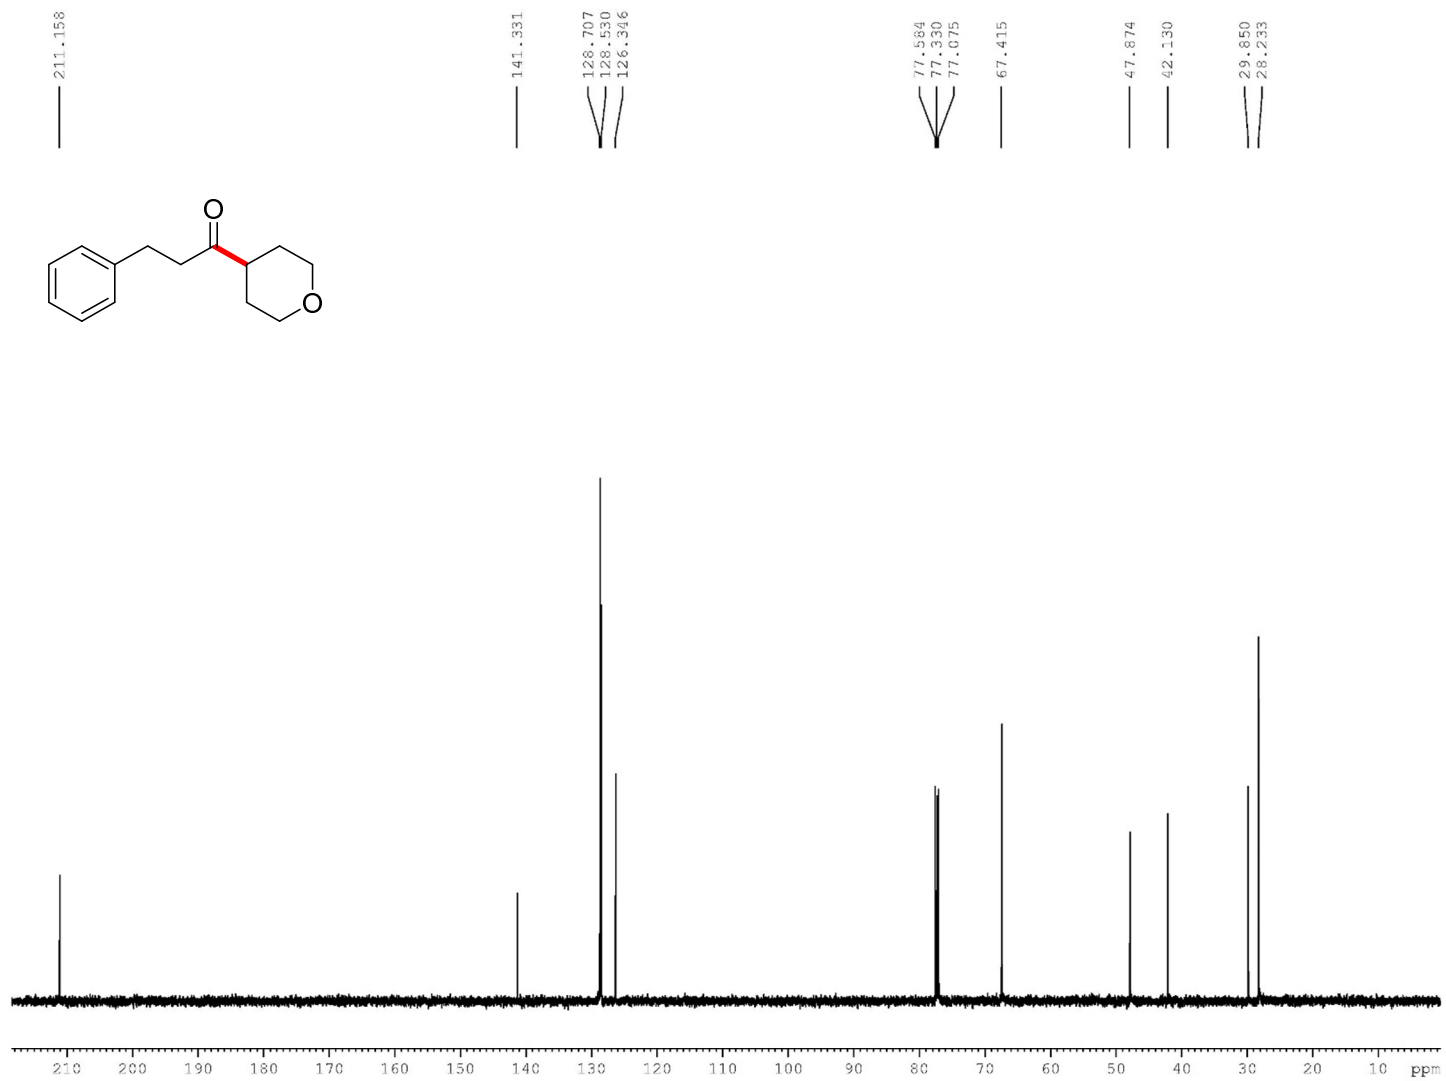

<sup>13</sup>C NMR (125.8 MHz, CDCl<sub>3</sub>) Spectrum of 3-Phenyl-1-(tetrahydro-2H-pyran-4-yl)propan-1-one (1i)

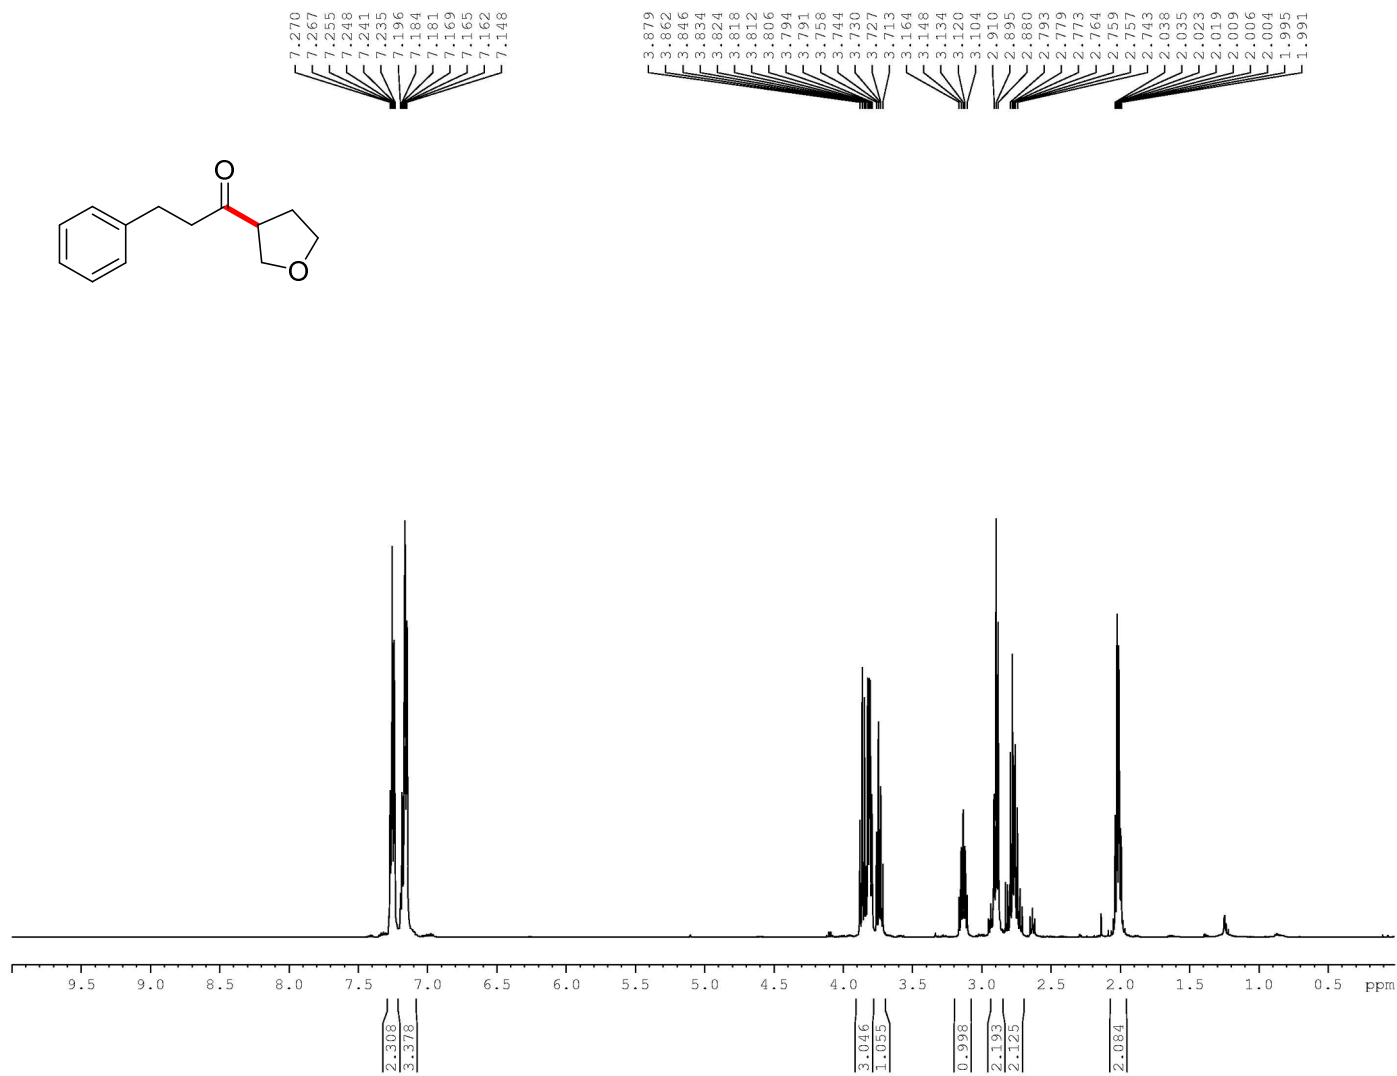

**<sup>1</sup>H NMR (500 MHz, CDCl<sub>3</sub>) Spectrum of 3-Phenyl-1-(tetrahydrofuran-3-yl)propan-1-one (1j)**



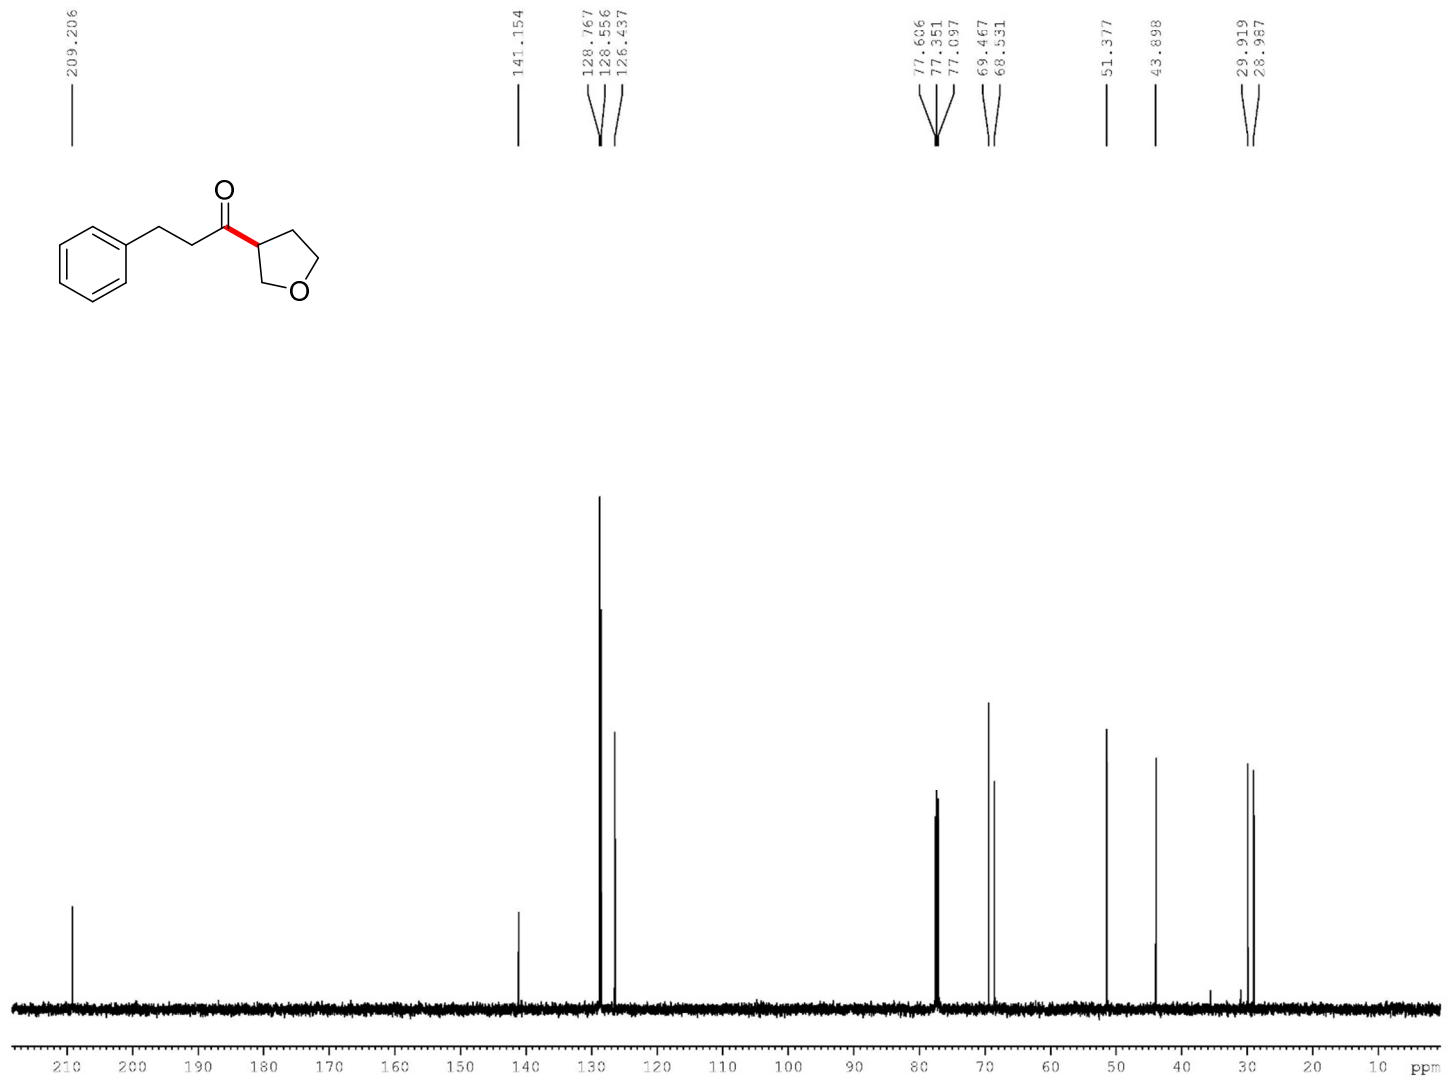

<sup>13</sup>C NMR (125.8 MHz, CDCl<sub>3</sub>) Spectrum of 3-Phenyl-1-(tetrahydrofuran-3-yl)propan-1-one (1j)

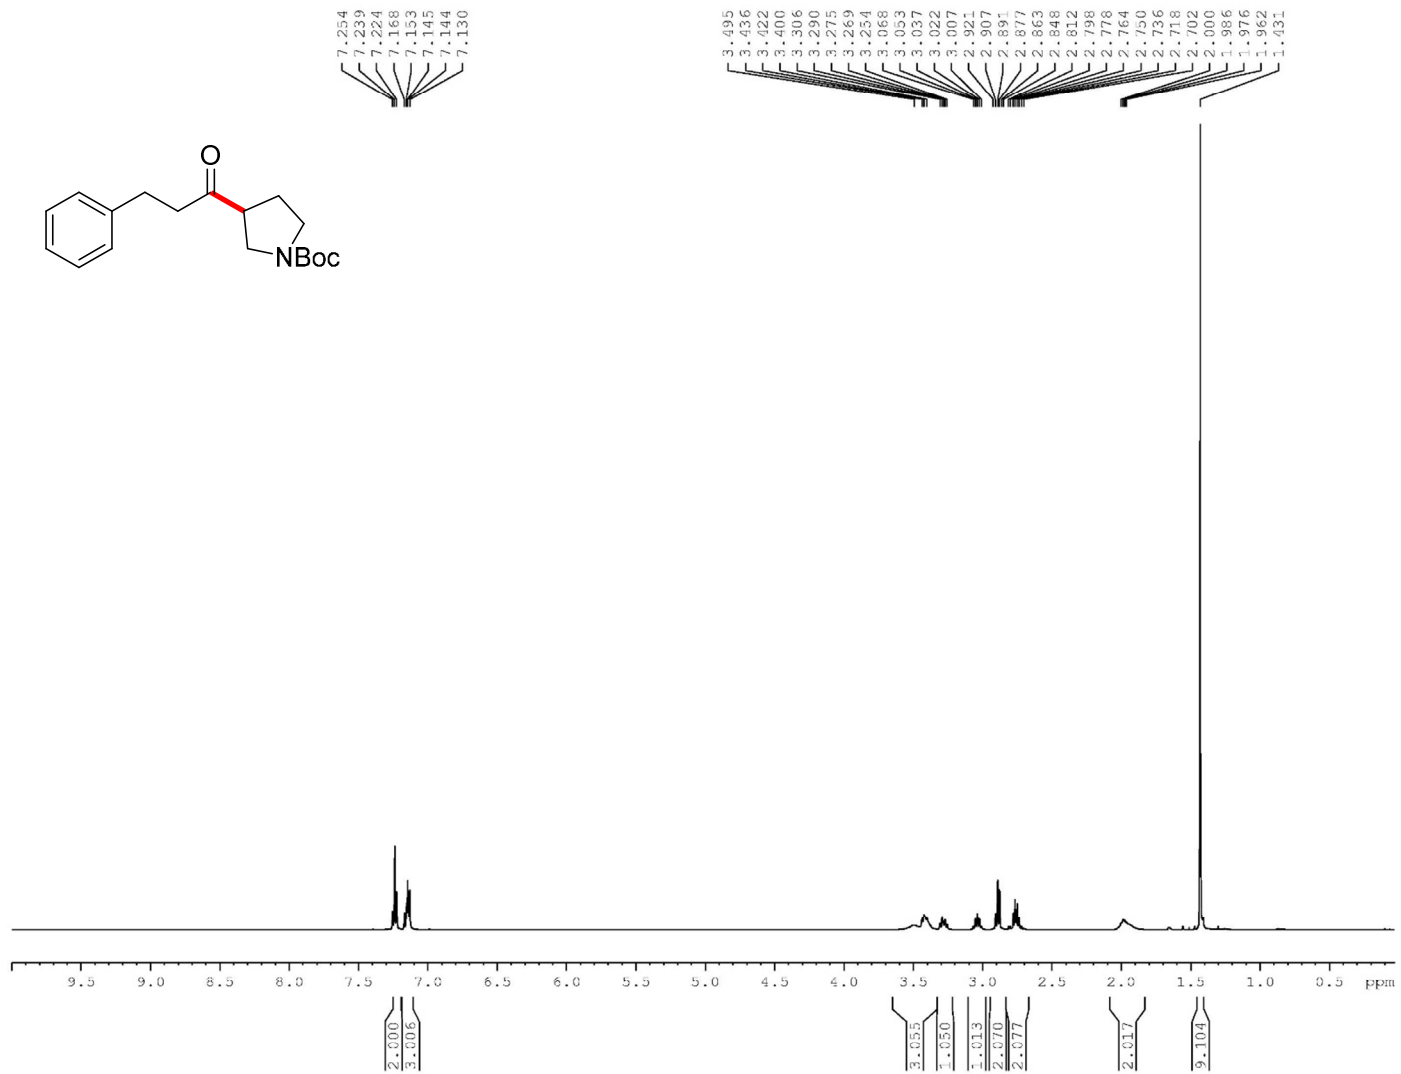

<sup>1</sup>H NMR (500 MHz, CDCl<sub>3</sub>) Spectrum of *tert*-Butyl 3-(3-phenylpropanoyl)pyrrolidine-1-carboxylate (1k)

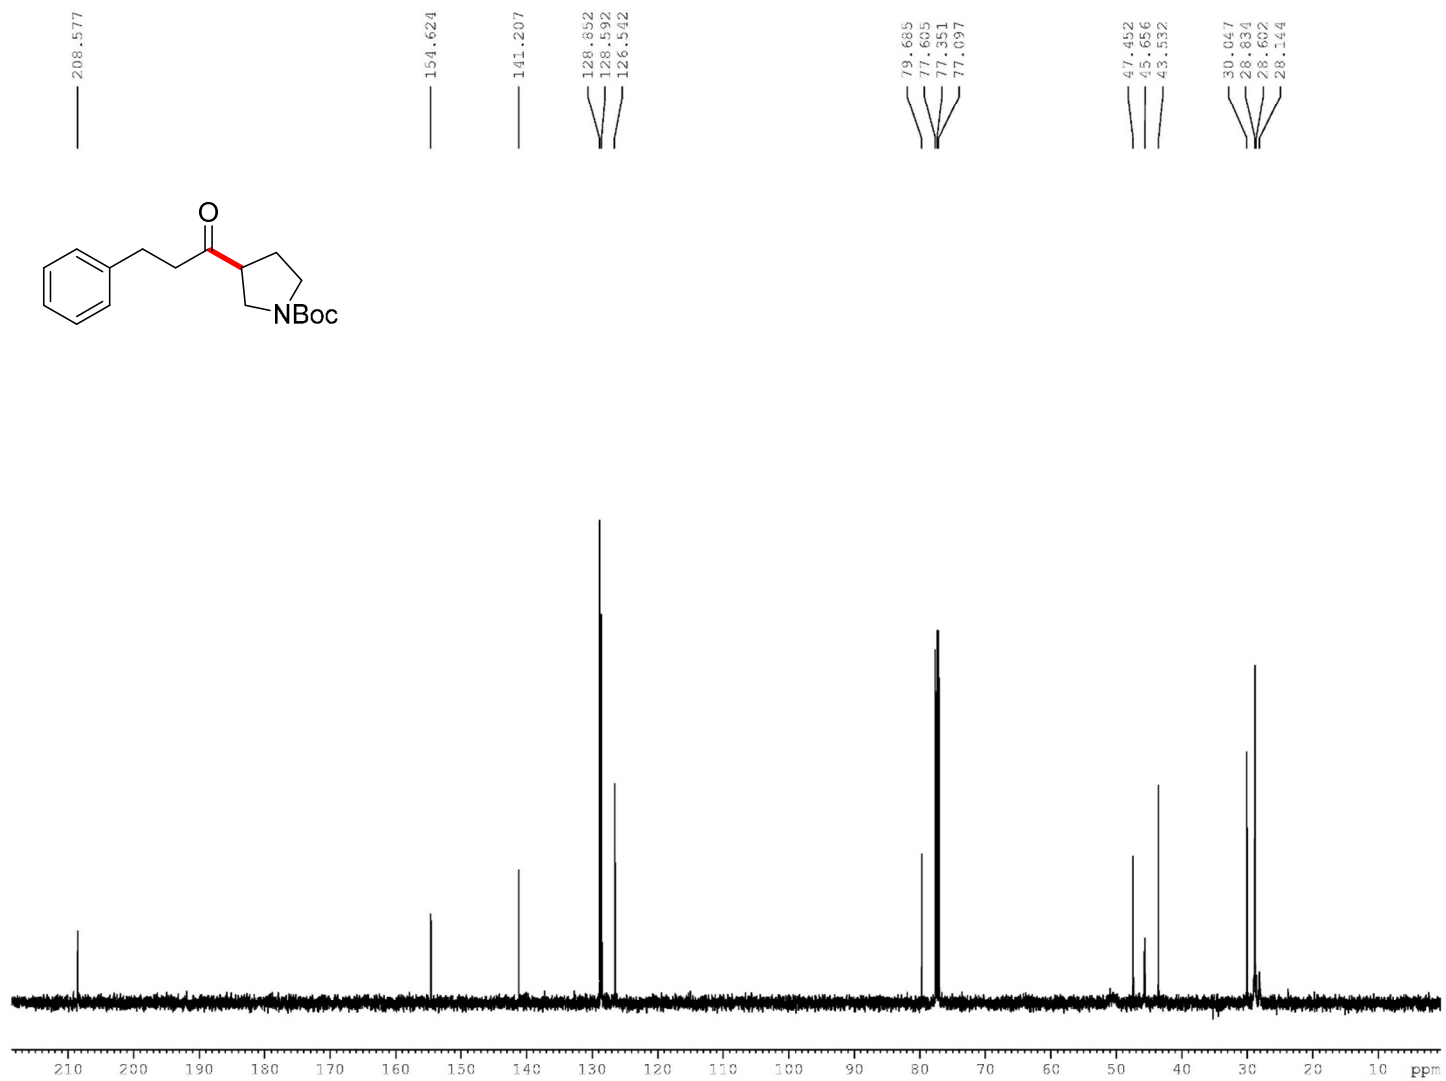

<sup>13</sup>C NMR (125.8 MHz, CDCl<sub>3</sub>) Spectrum of *tert*-Butyl 3-(3-phenylpropanoyl)pyrrolidine-1-carboxylate (1k)

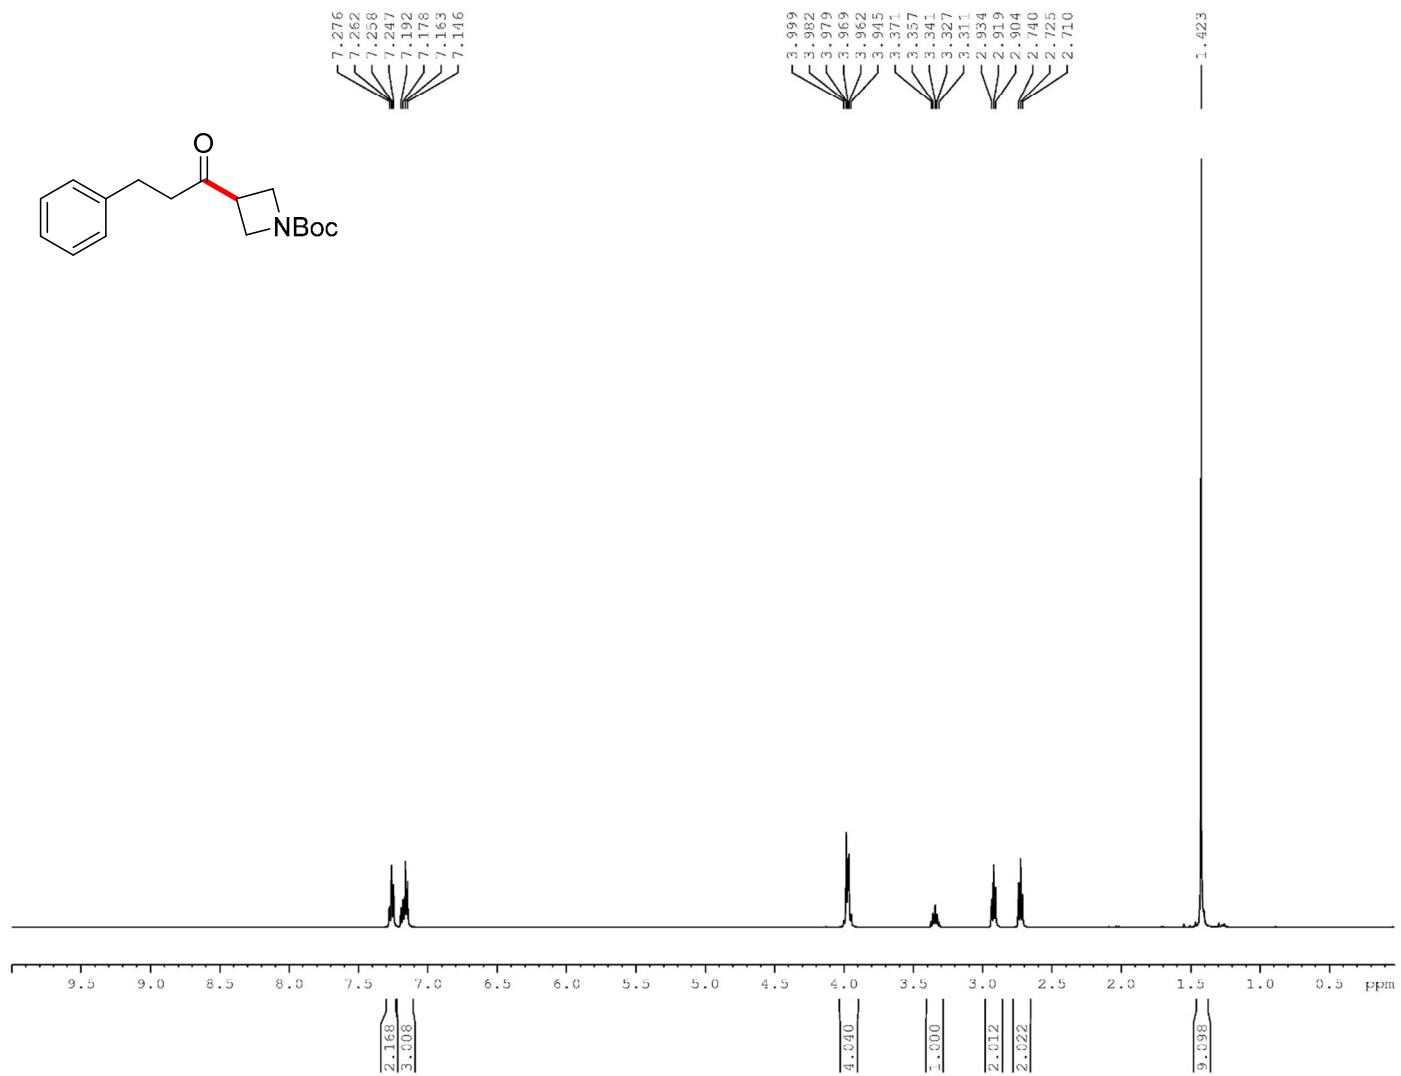

<sup>1</sup>H NMR (500 MHz, CDCl<sub>3</sub>) Spectrum of *tert*-Butyl 3-(3-phenylpropanoyl)azetidine-1-carboxylate (11)

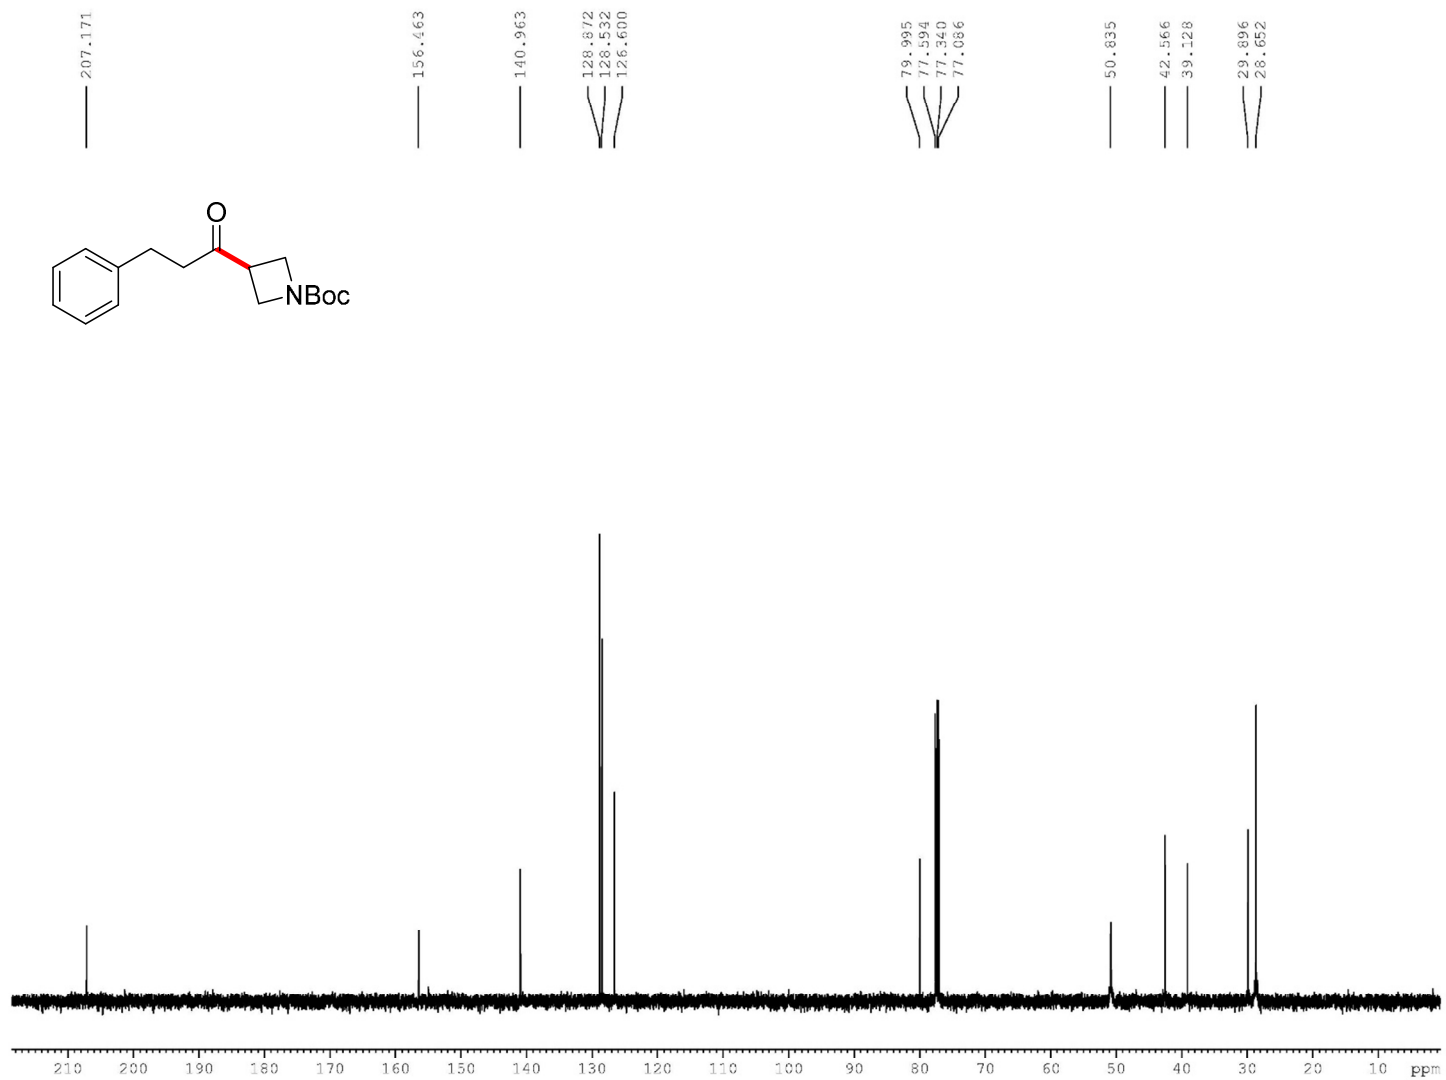

<sup>13</sup>C NMR (125.8 MHz, CDCl<sub>3</sub>) Spectrum of *tert*-Butyl 3-(3-phenylpropanoyl)azetidine-1-carboxylate (II)

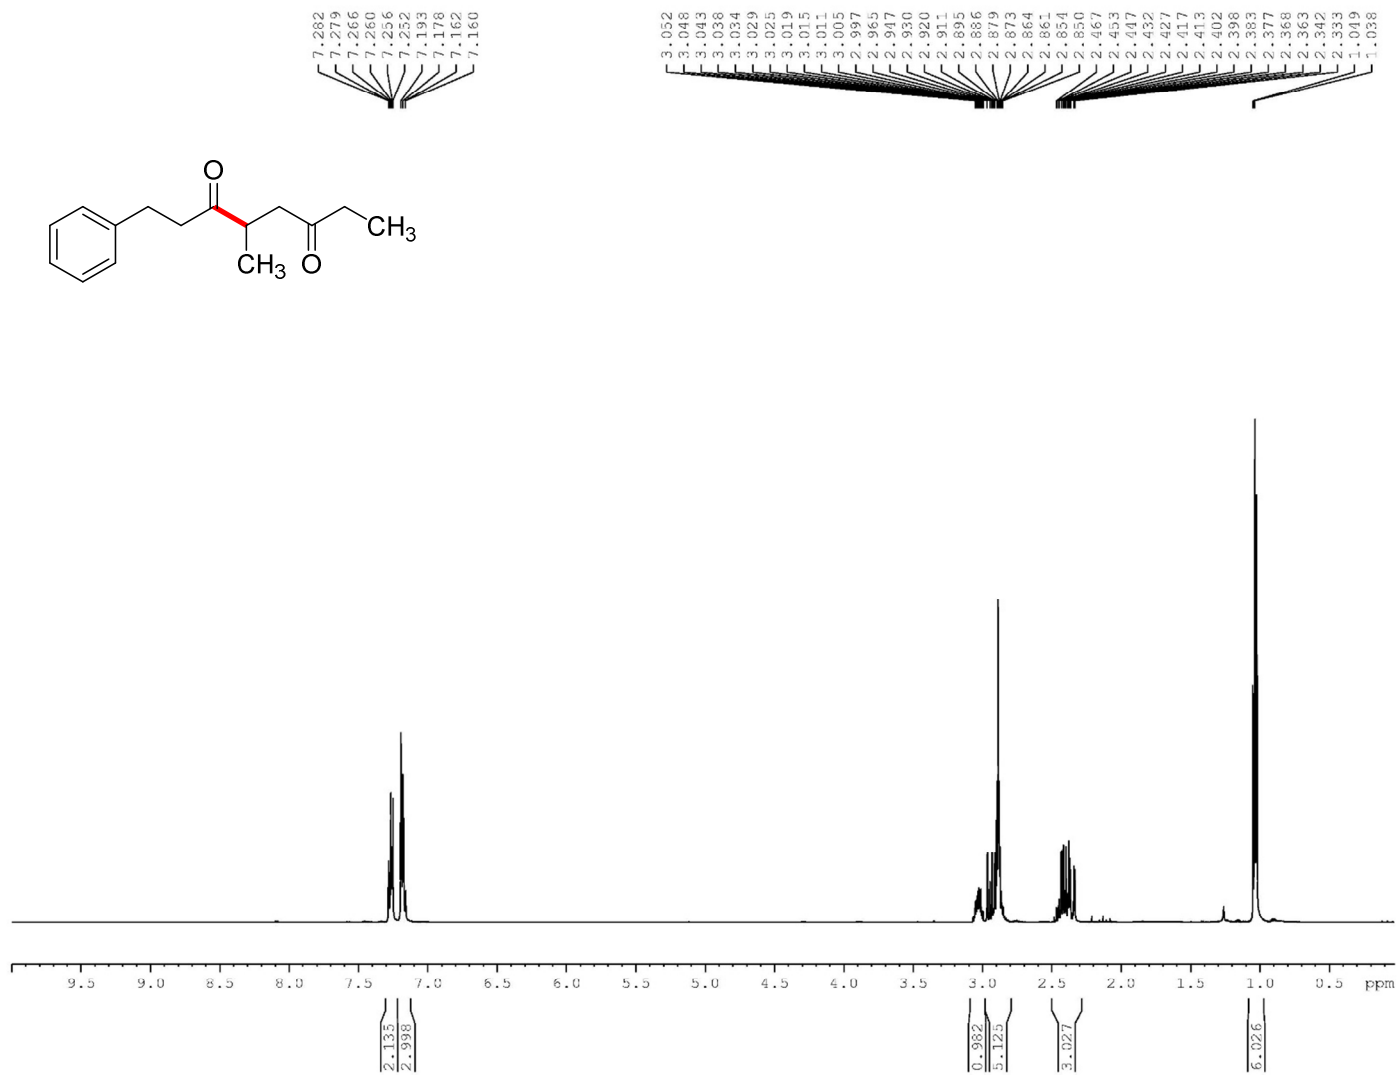

<sup>1</sup>H NMR (500 MHz, CDCl<sub>3</sub>) Spectrum of 4-Methyl-1-phenyloctane-3,6-dione (1m)

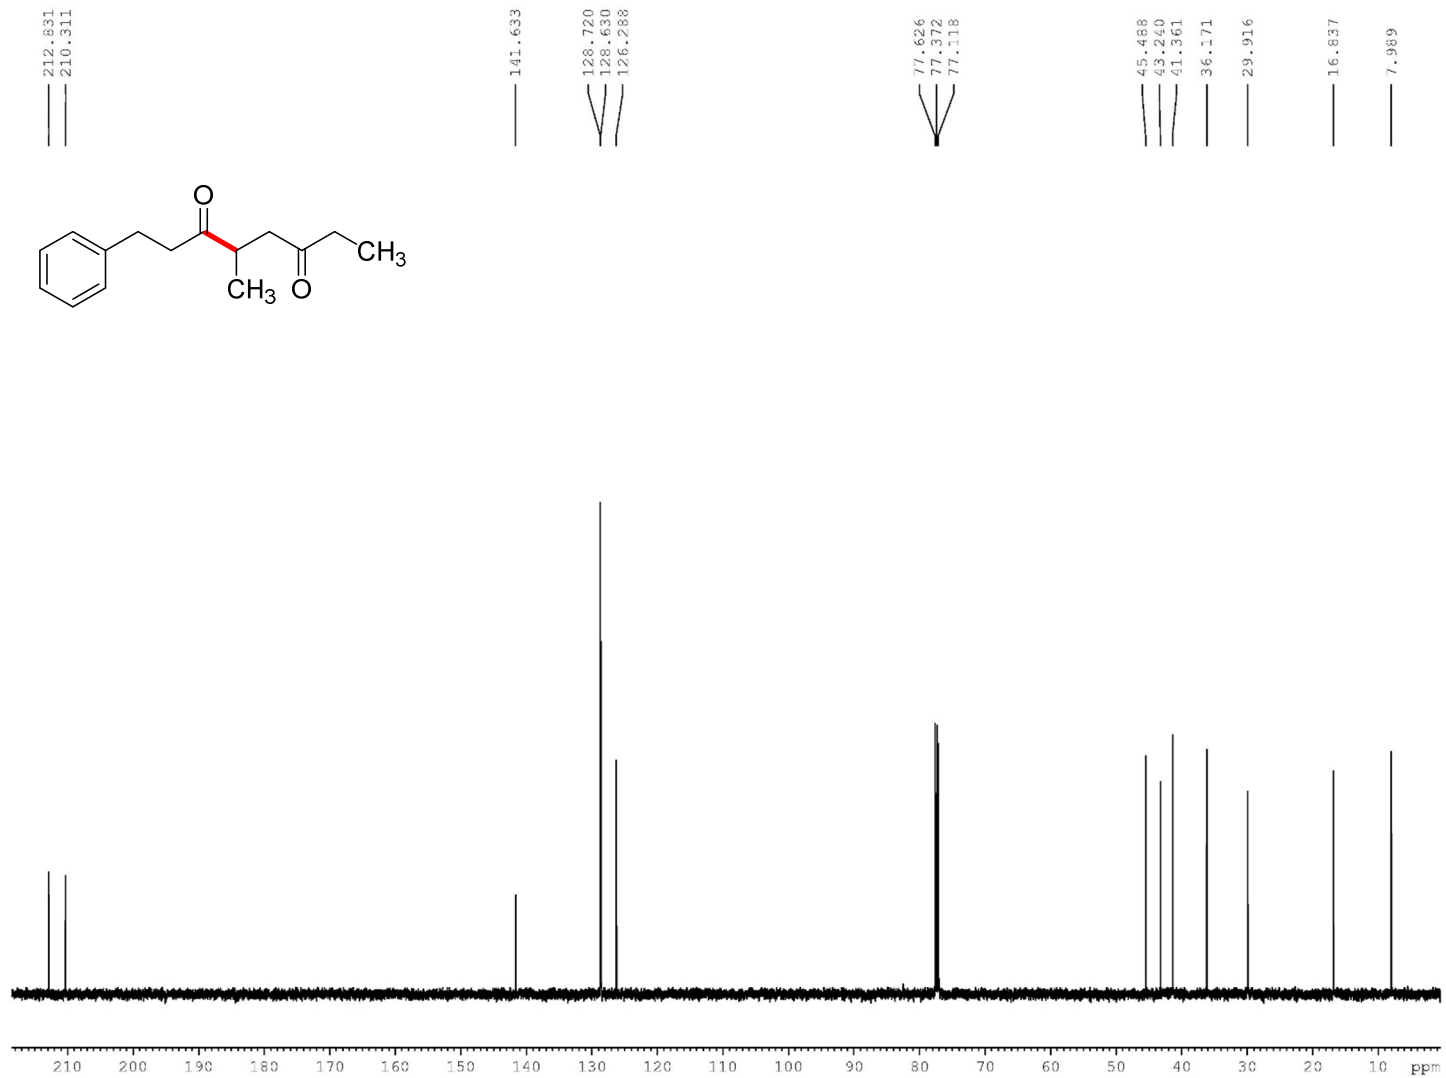

<sup>13</sup>C NMR (125.8 MHz, CDCl<sub>3</sub>) Spectrum of 4-Methyl-1-phenyloctane-3,6-dione (1m)

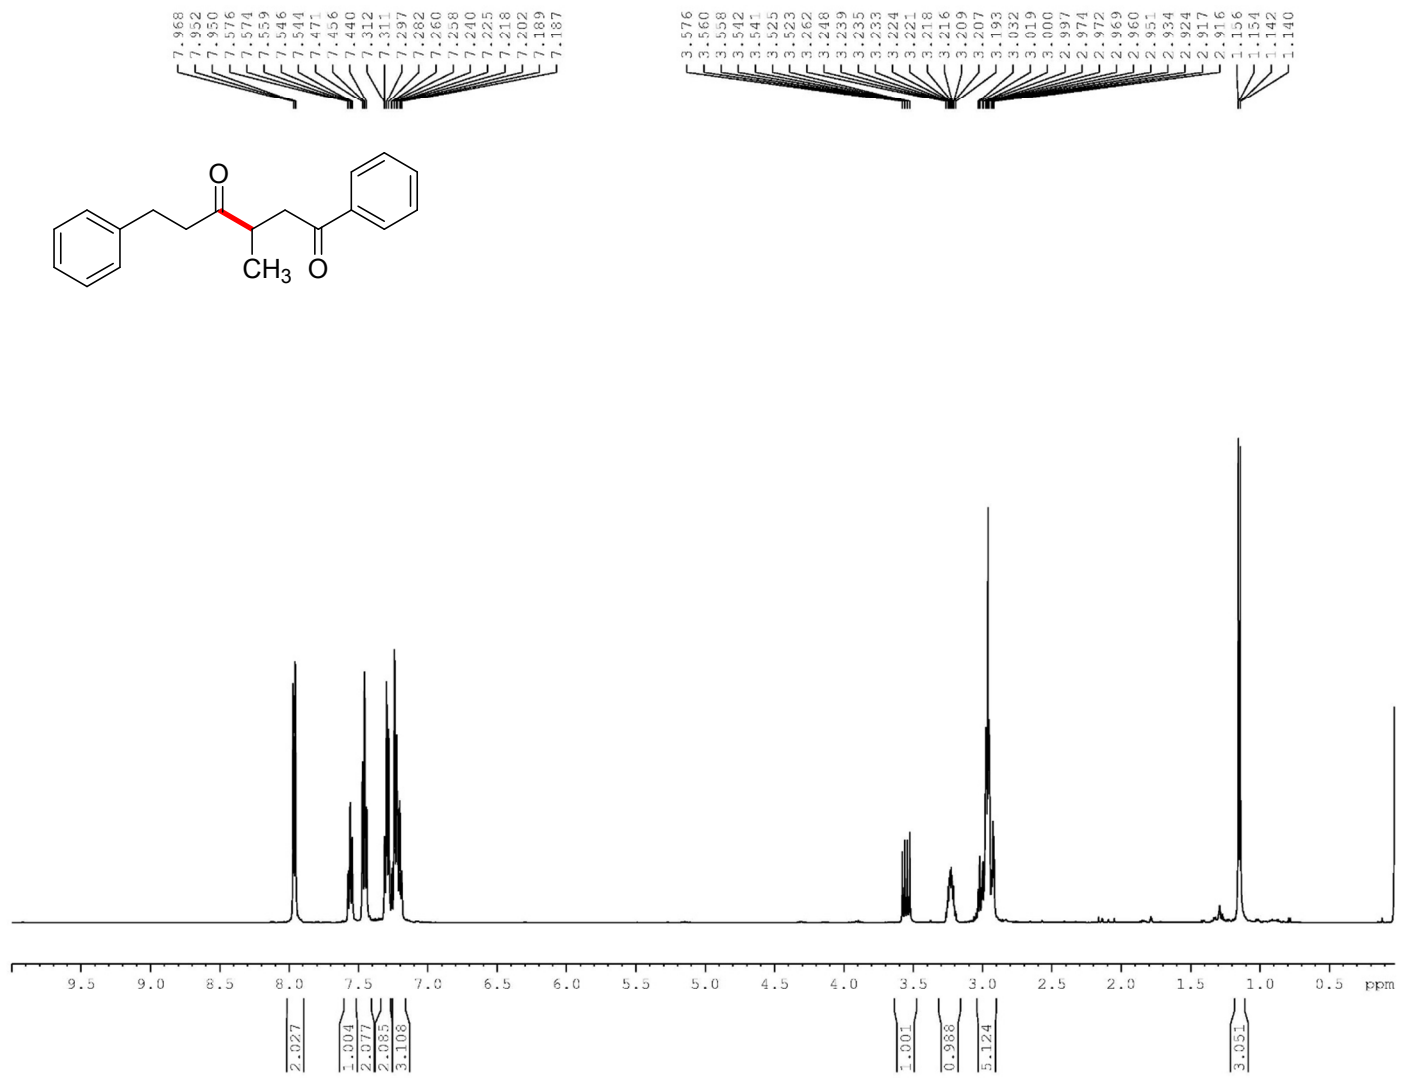

$^1\text{H}$  NMR (500 MHz,  $\text{CDCl}_3$ ) Spectrum of 3-Methyl-1,6-diphenylhexane-1,4-dione (1n)



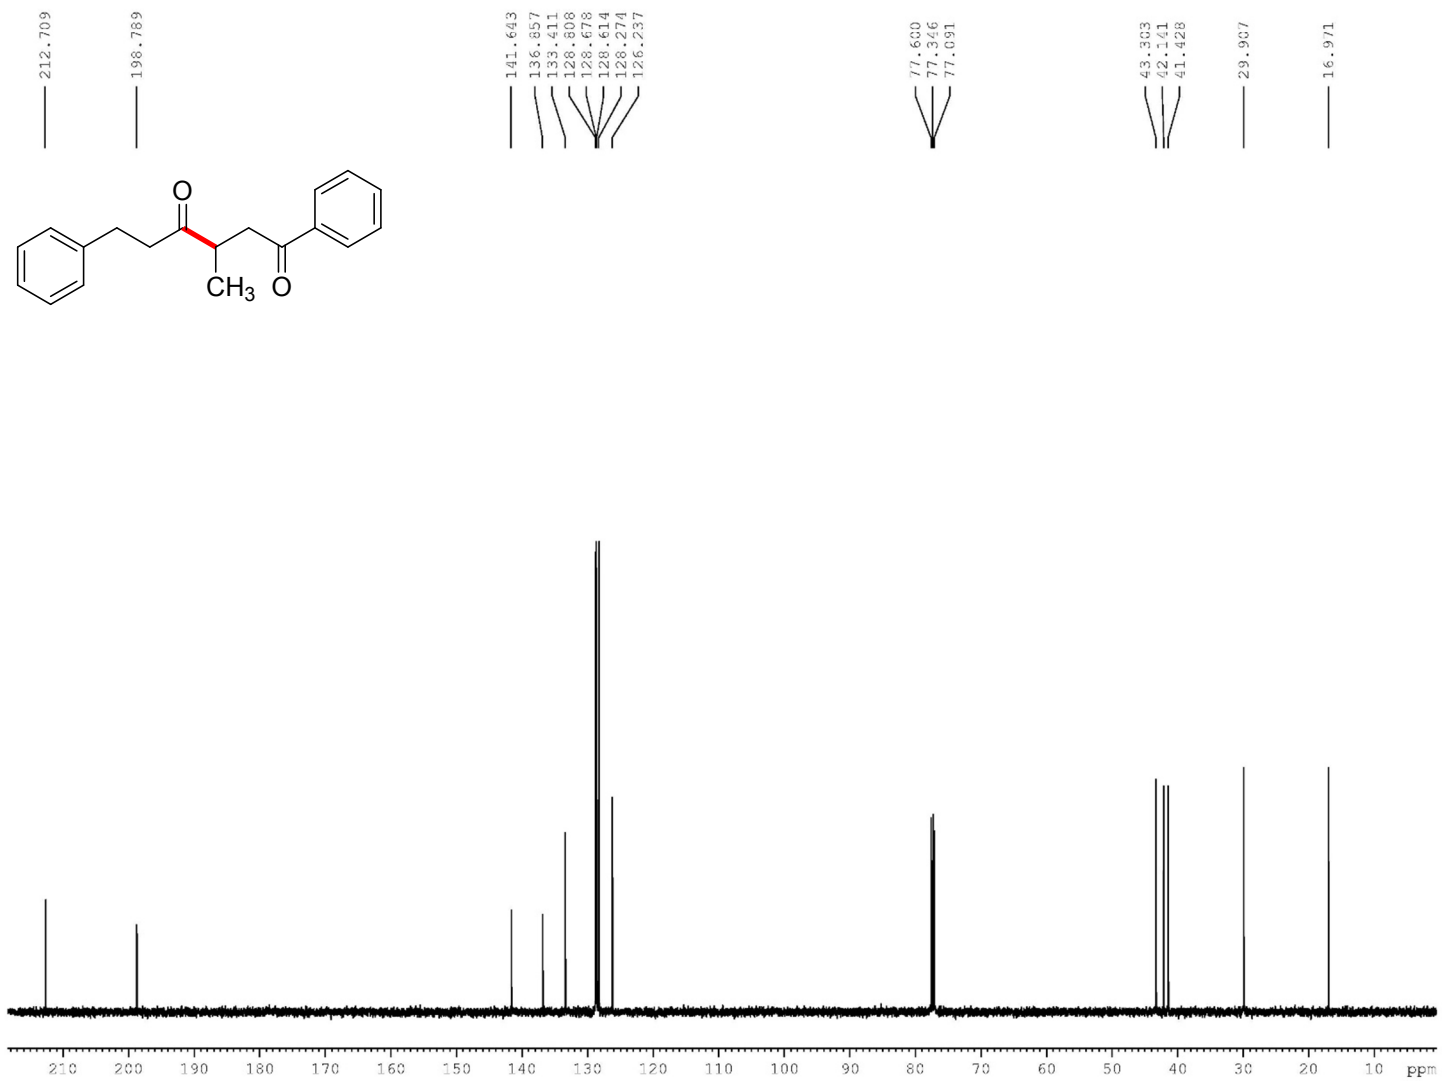

**<sup>13</sup>C NMR (125.8 MHz, CDCl<sub>3</sub>) Spectrum of 3-Methyl-1,6-diphenylhexane-1,4-dione (1n)**

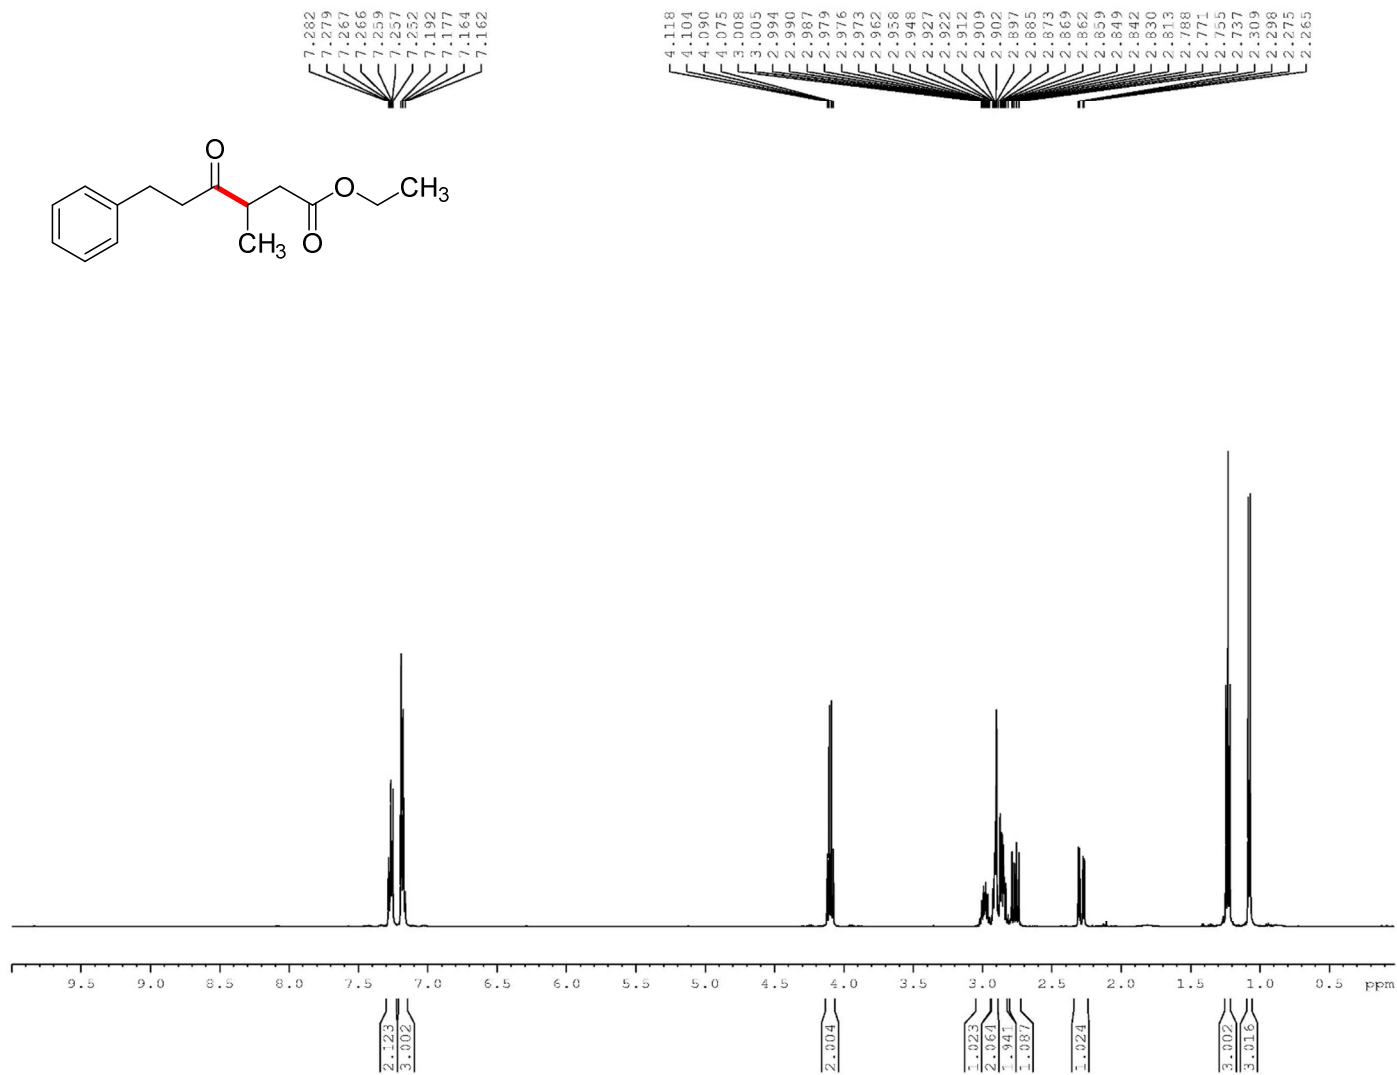

<sup>1</sup>H NMR (500 MHz, CDCl<sub>3</sub>) Spectrum of Ethyl 3-methyl-4-oxo-6-phenylhexanoate (10)

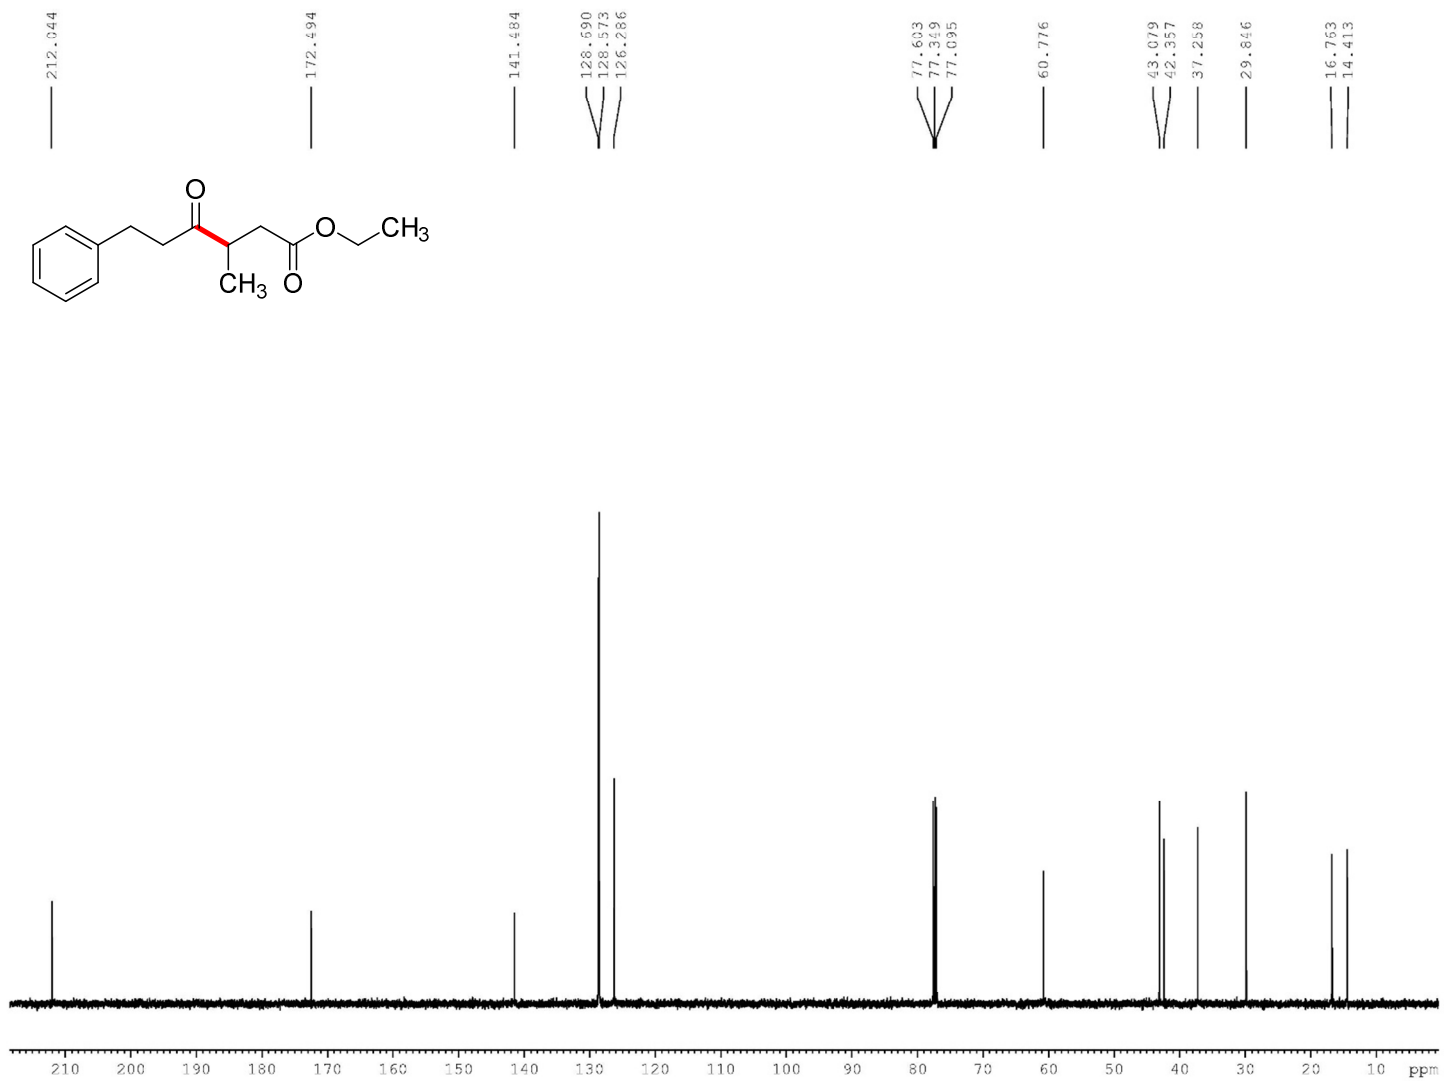

<sup>13</sup>C NMR (125.8 MHz, CDCl<sub>3</sub>) Spectrum of Ethyl 3-methyl-4-oxo-6-phenylhexanoate (1o)

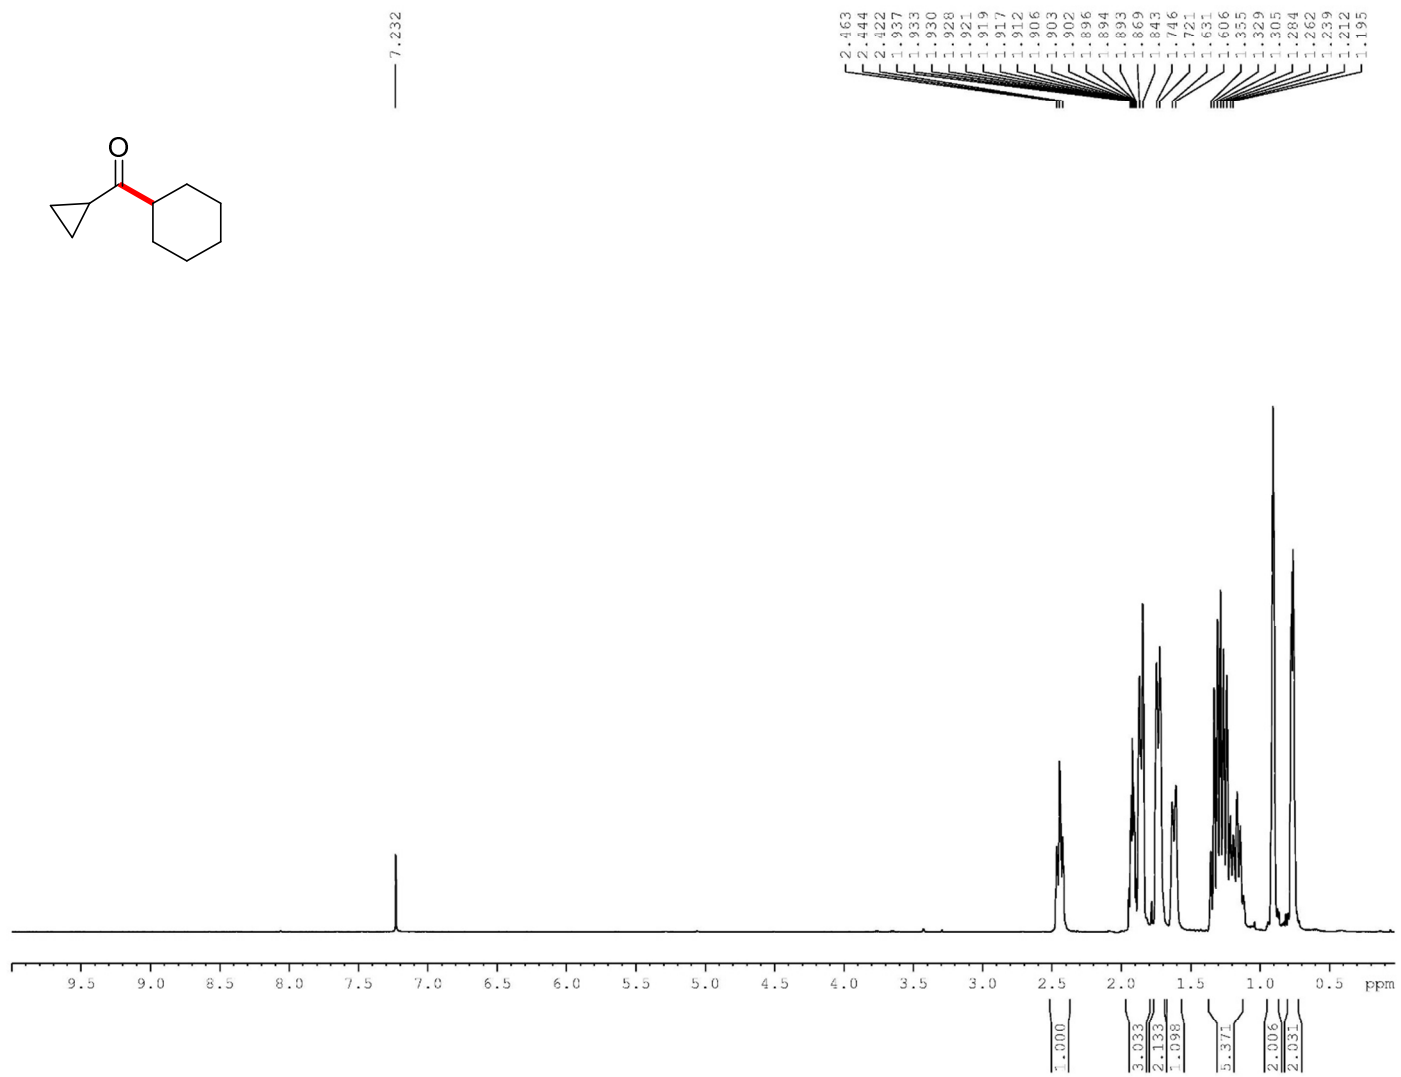

<sup>1</sup>H NMR (500 MHz, CDCl<sub>3</sub>) Spectrum of Cyclohexyl(cyclopropyl)methanone (2a)

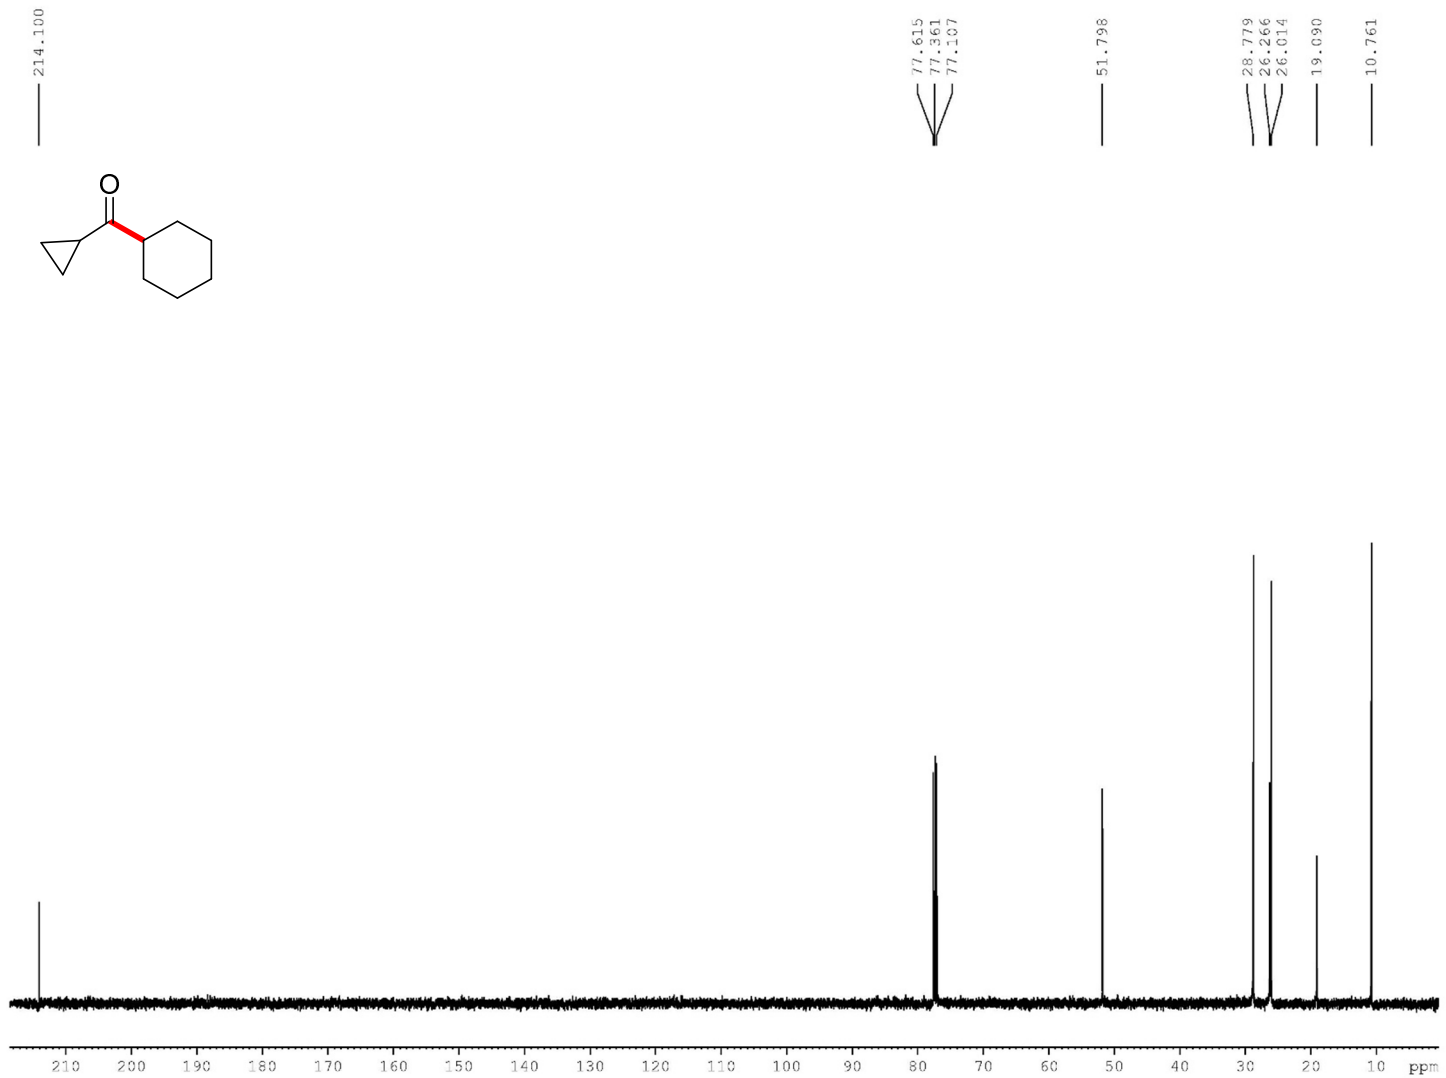

<sup>13</sup>C NMR (125.8 MHz, CDCl<sub>3</sub>) Spectrum of Cyclohexyl(cyclopropyl)methanone (2a)

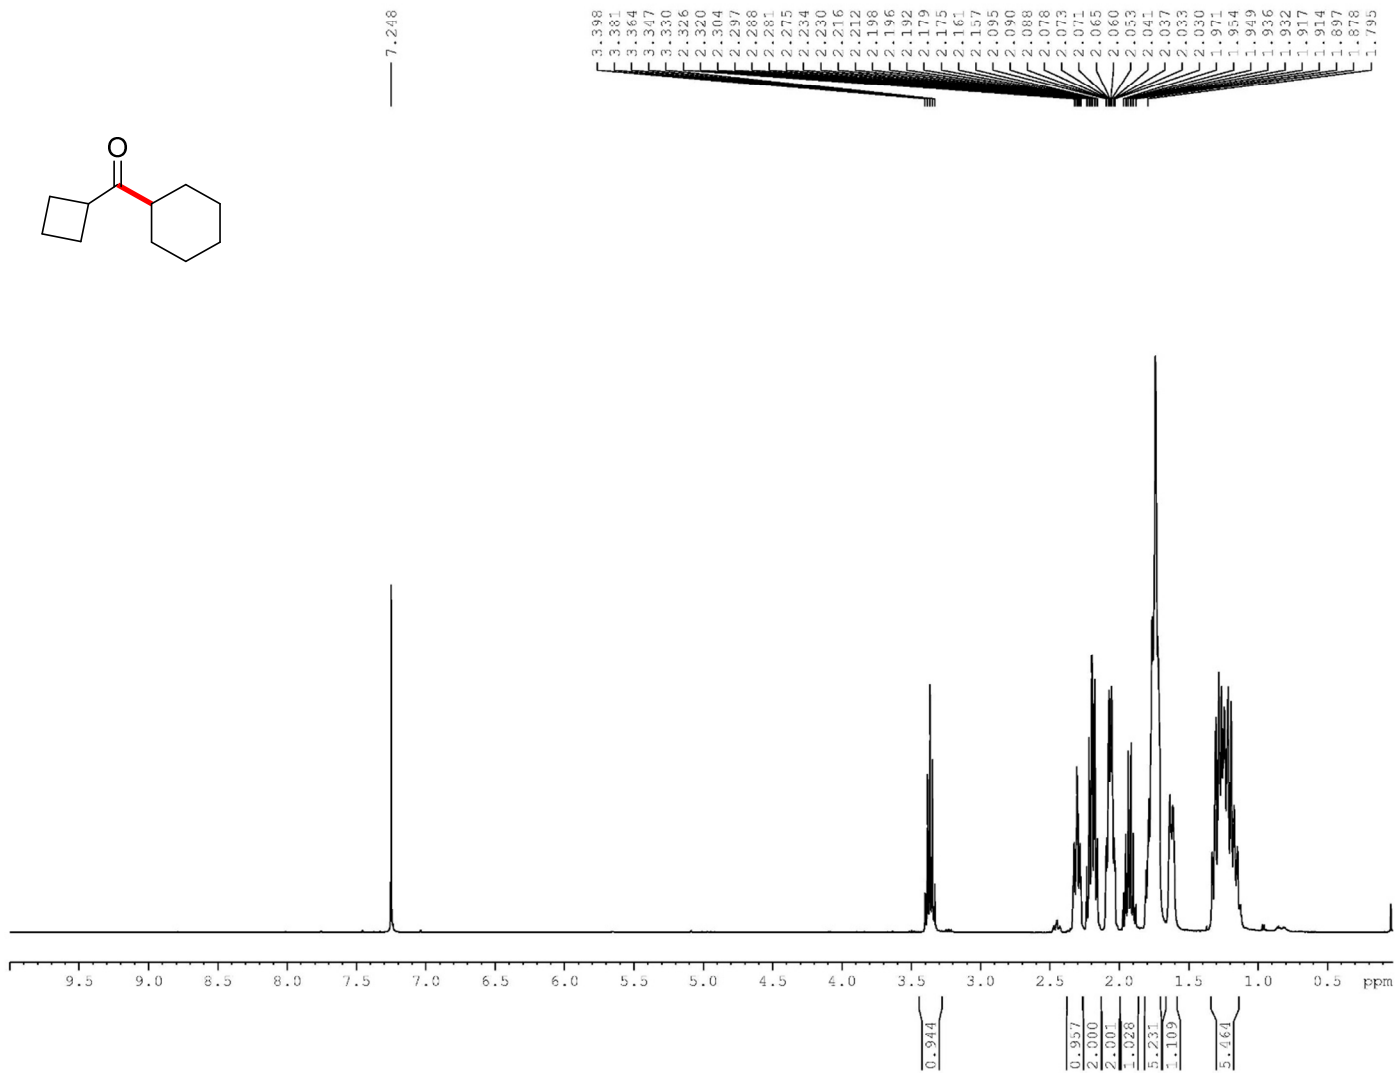

<sup>1</sup>H NMR (500 MHz, CDCl<sub>3</sub>) Spectrum of Cyclobutyl(cyclohexyl)methanone (2b)

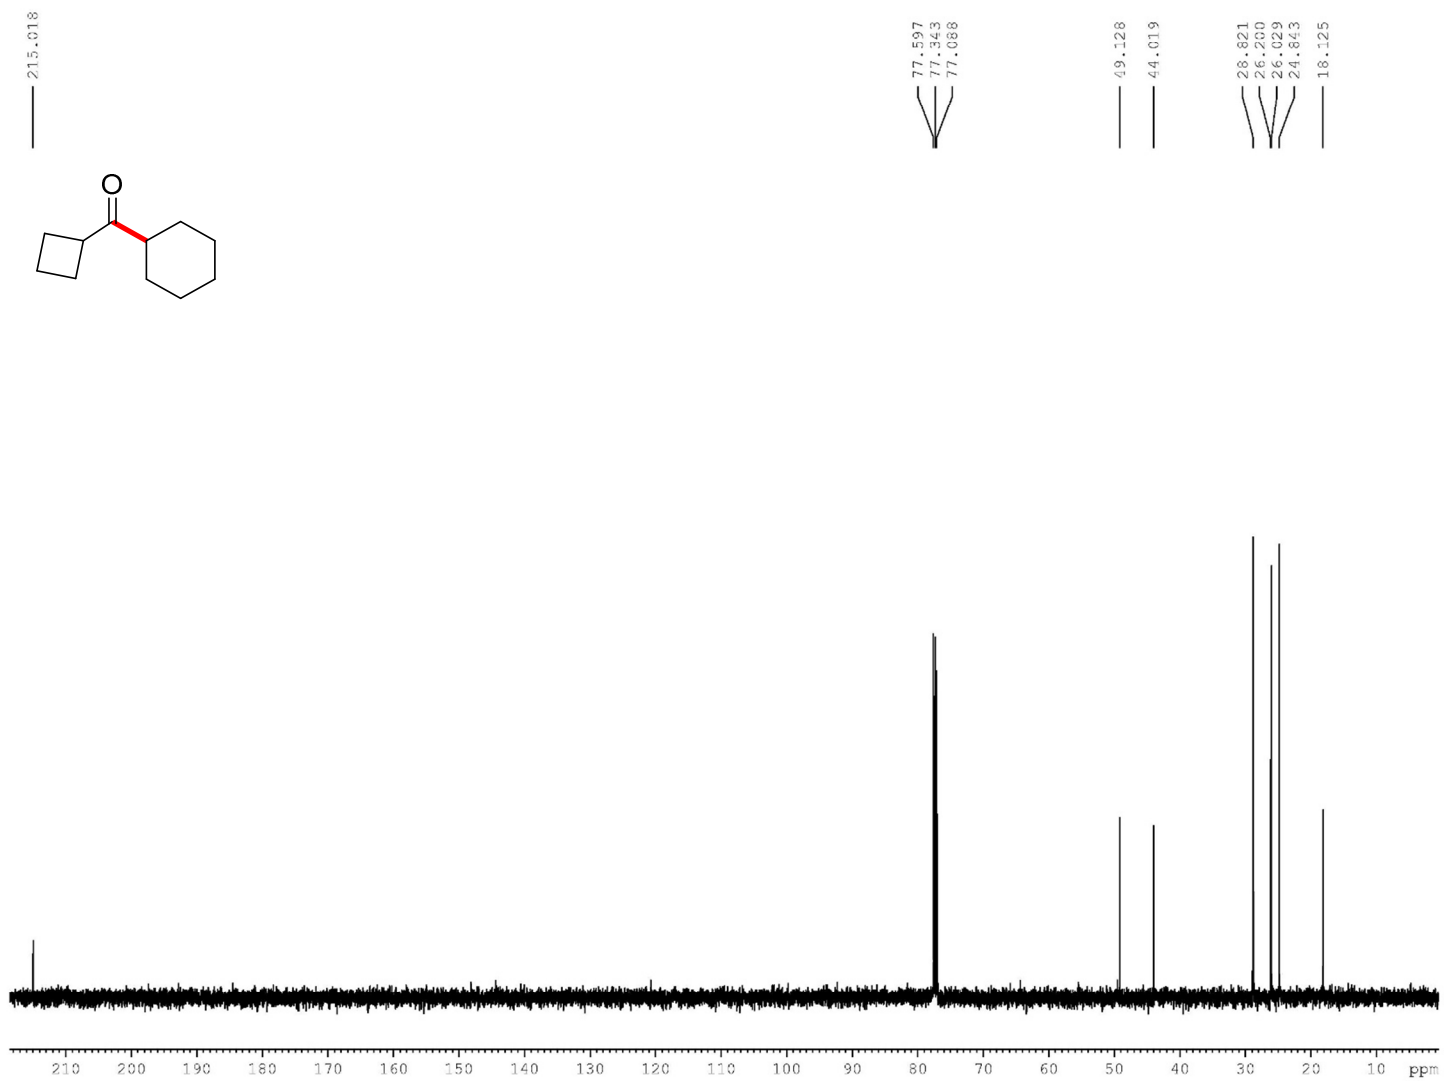

$^{13}\text{C}$  NMR (125.8 MHz,  $\text{CDCl}_3$ ) Spectrum of Cyclobutyl(cyclohexyl)methanone (2b)

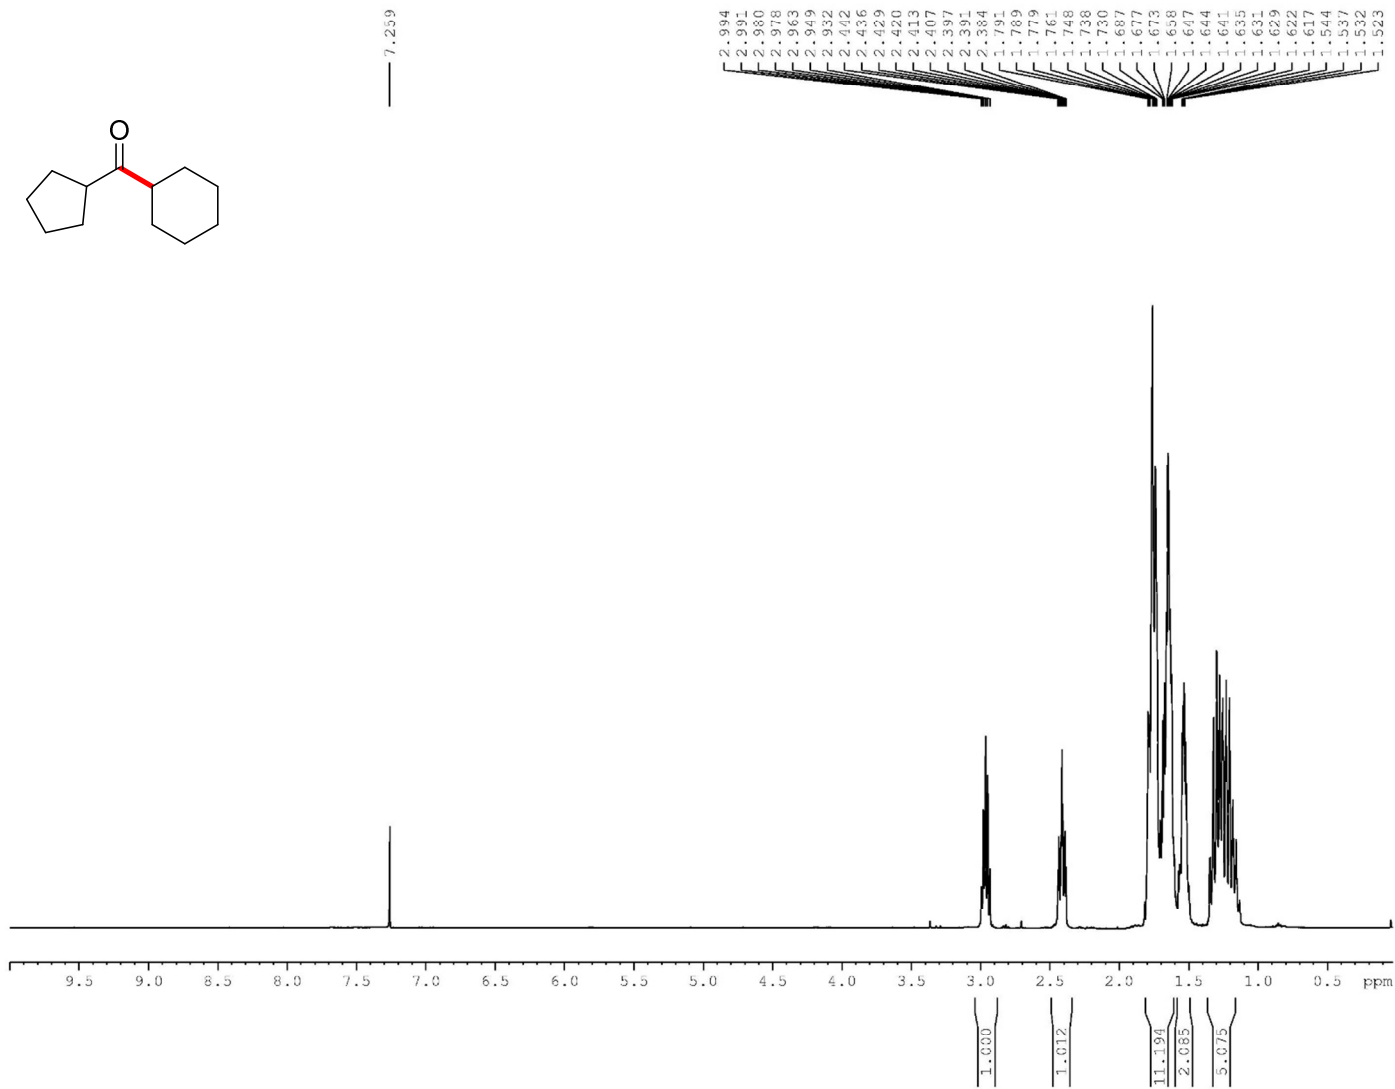

<sup>1</sup>H NMR (500 MHz, CDCl<sub>3</sub>) Spectrum of Cyclohexyl(cyclopentyl)methanone (2c)



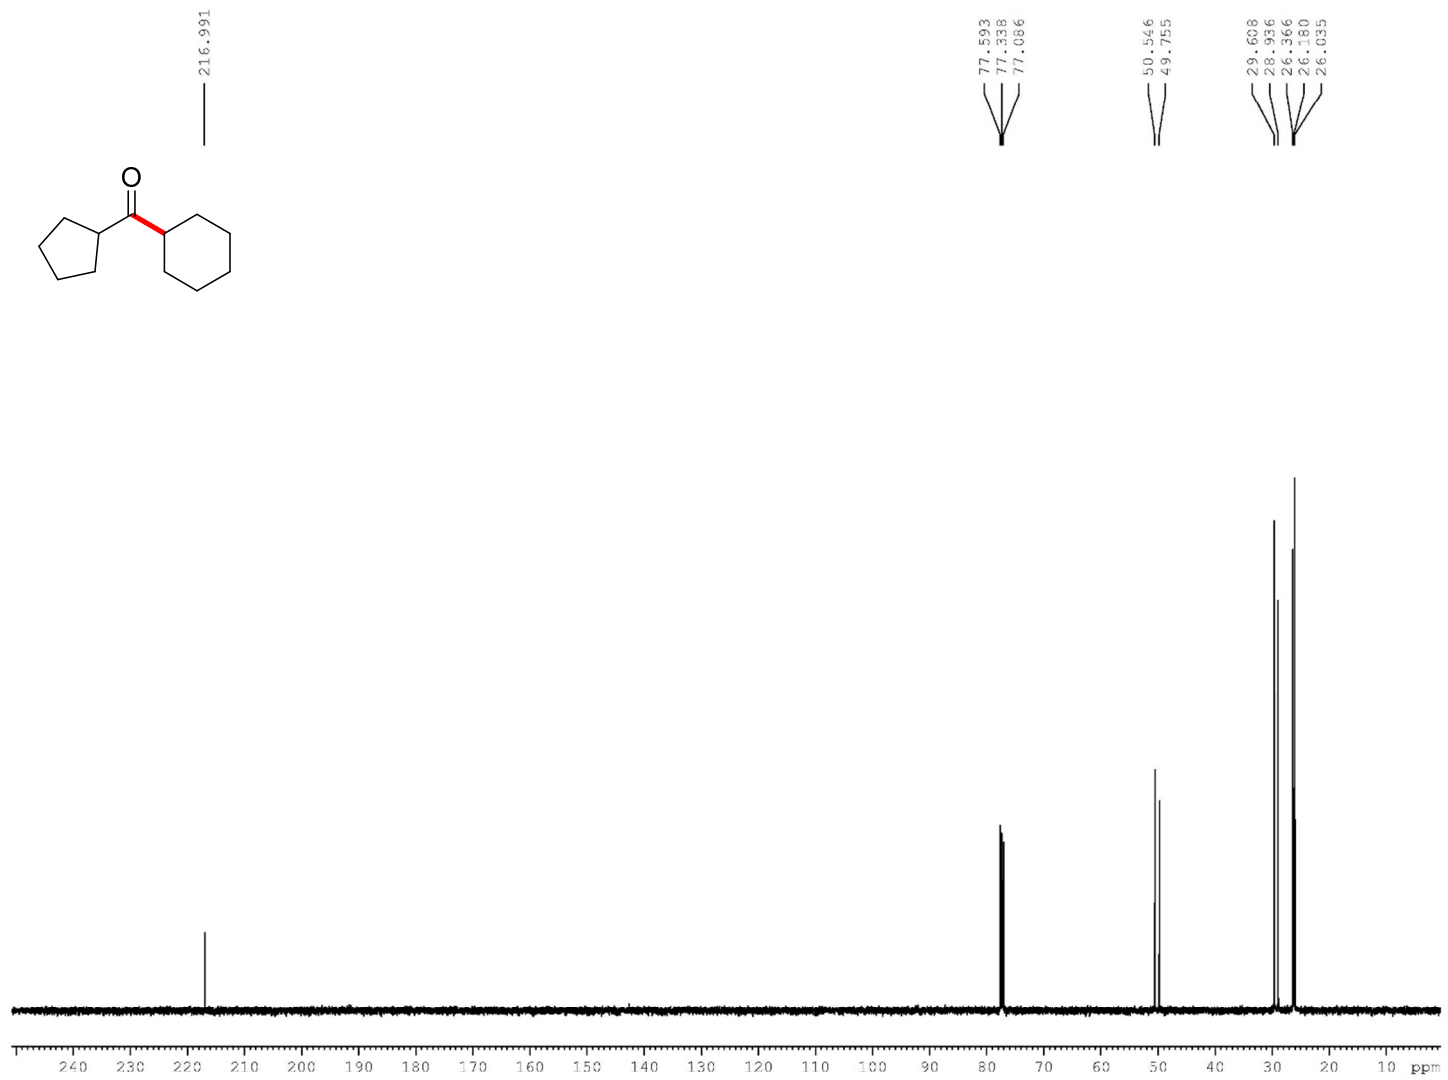

$^{13}\text{C}$  NMR (125.8 MHz,  $\text{CDCl}_3$ ) Spectrum of Cyclohexyl(cyclopentyl)methanone (2c)

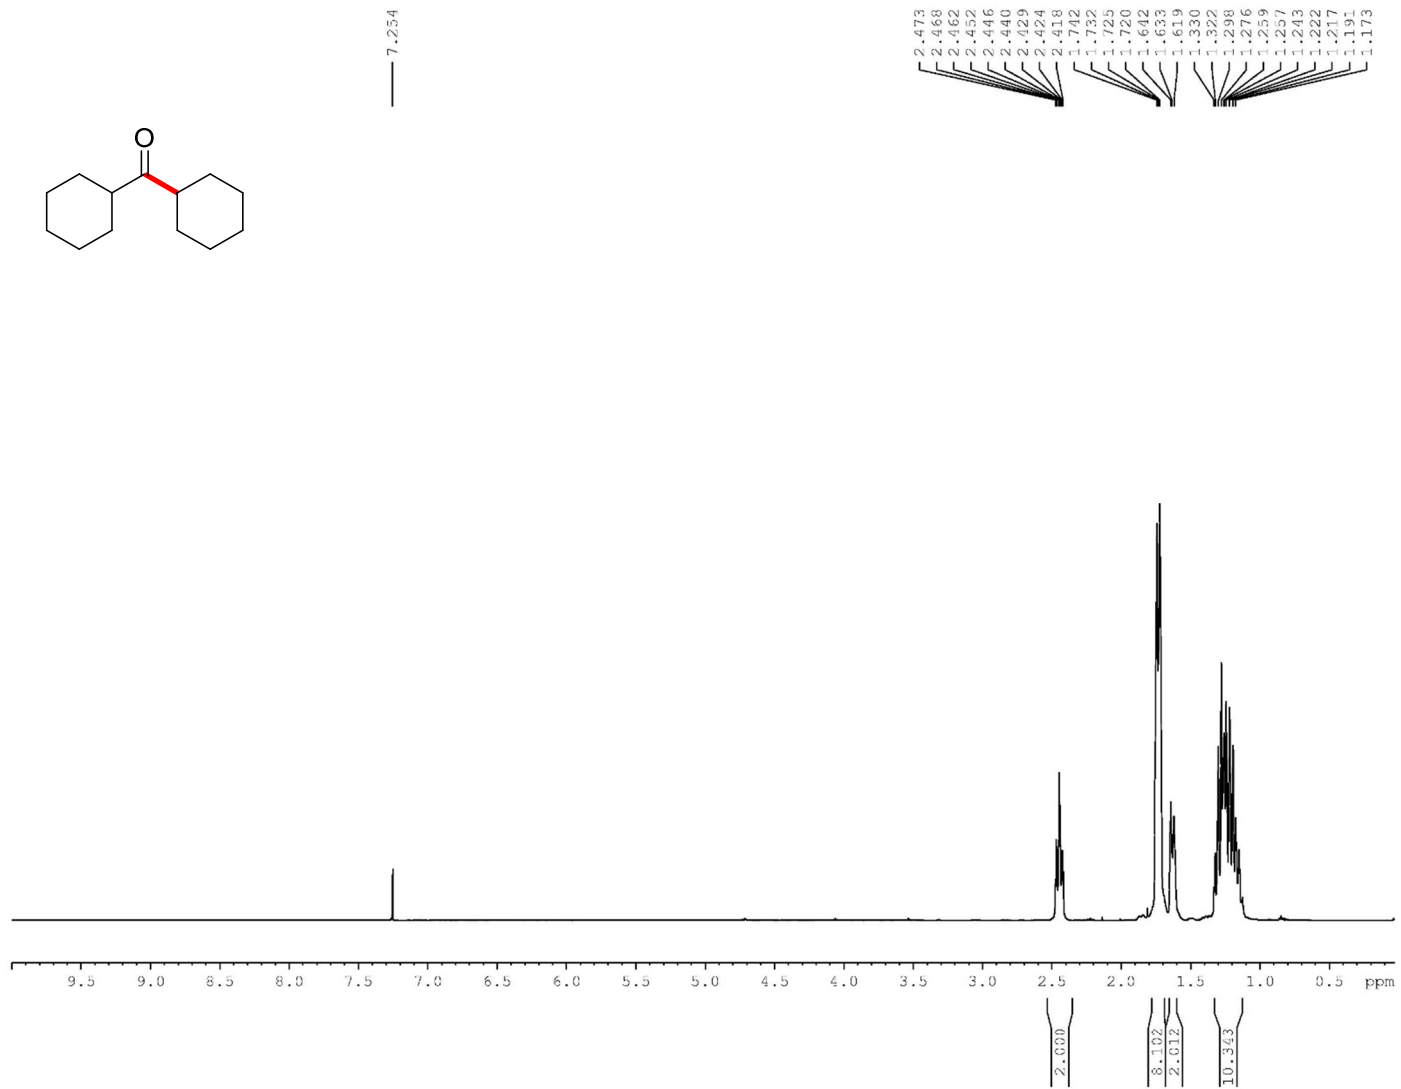

<sup>1</sup>H NMR (500 MHz, CDCl<sub>3</sub>) Spectrum of Dicyclohexylmethanone (2d)

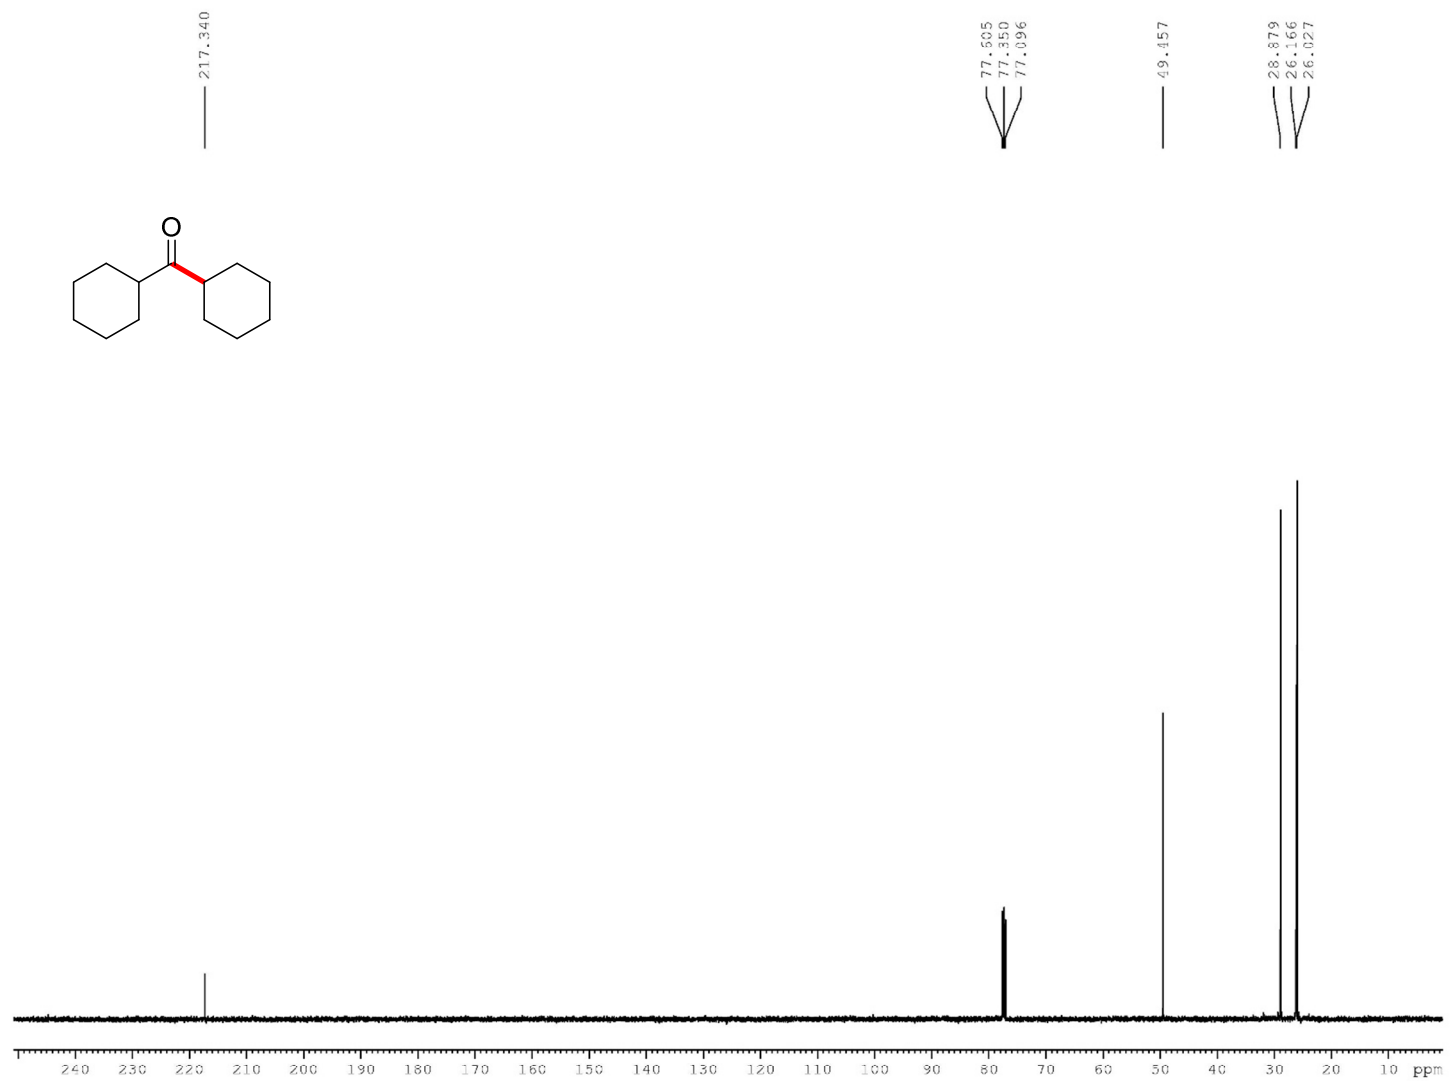

<sup>13</sup>C NMR (125.8 MHz, CDCl<sub>3</sub>) Spectrum of Dicyclohexylmethanone (2d)

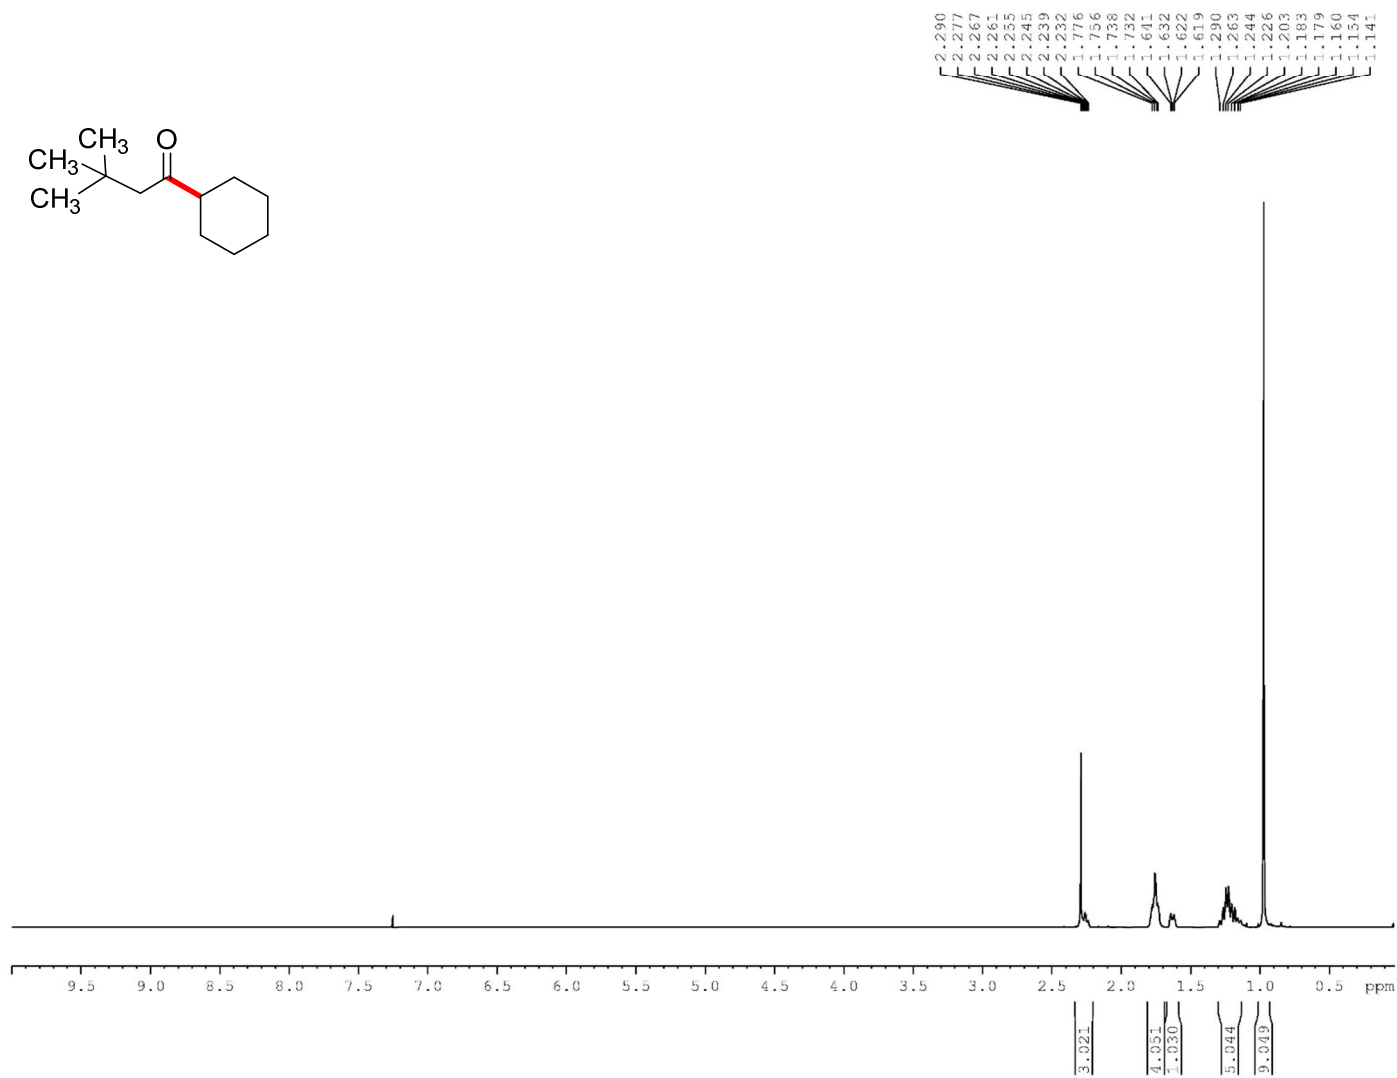

**<sup>1</sup>H NMR (500 MHz, CDCl<sub>3</sub>) Spectrum of 1-Cyclohexyl-3,3-dimethylbutan-1-one (2e)**

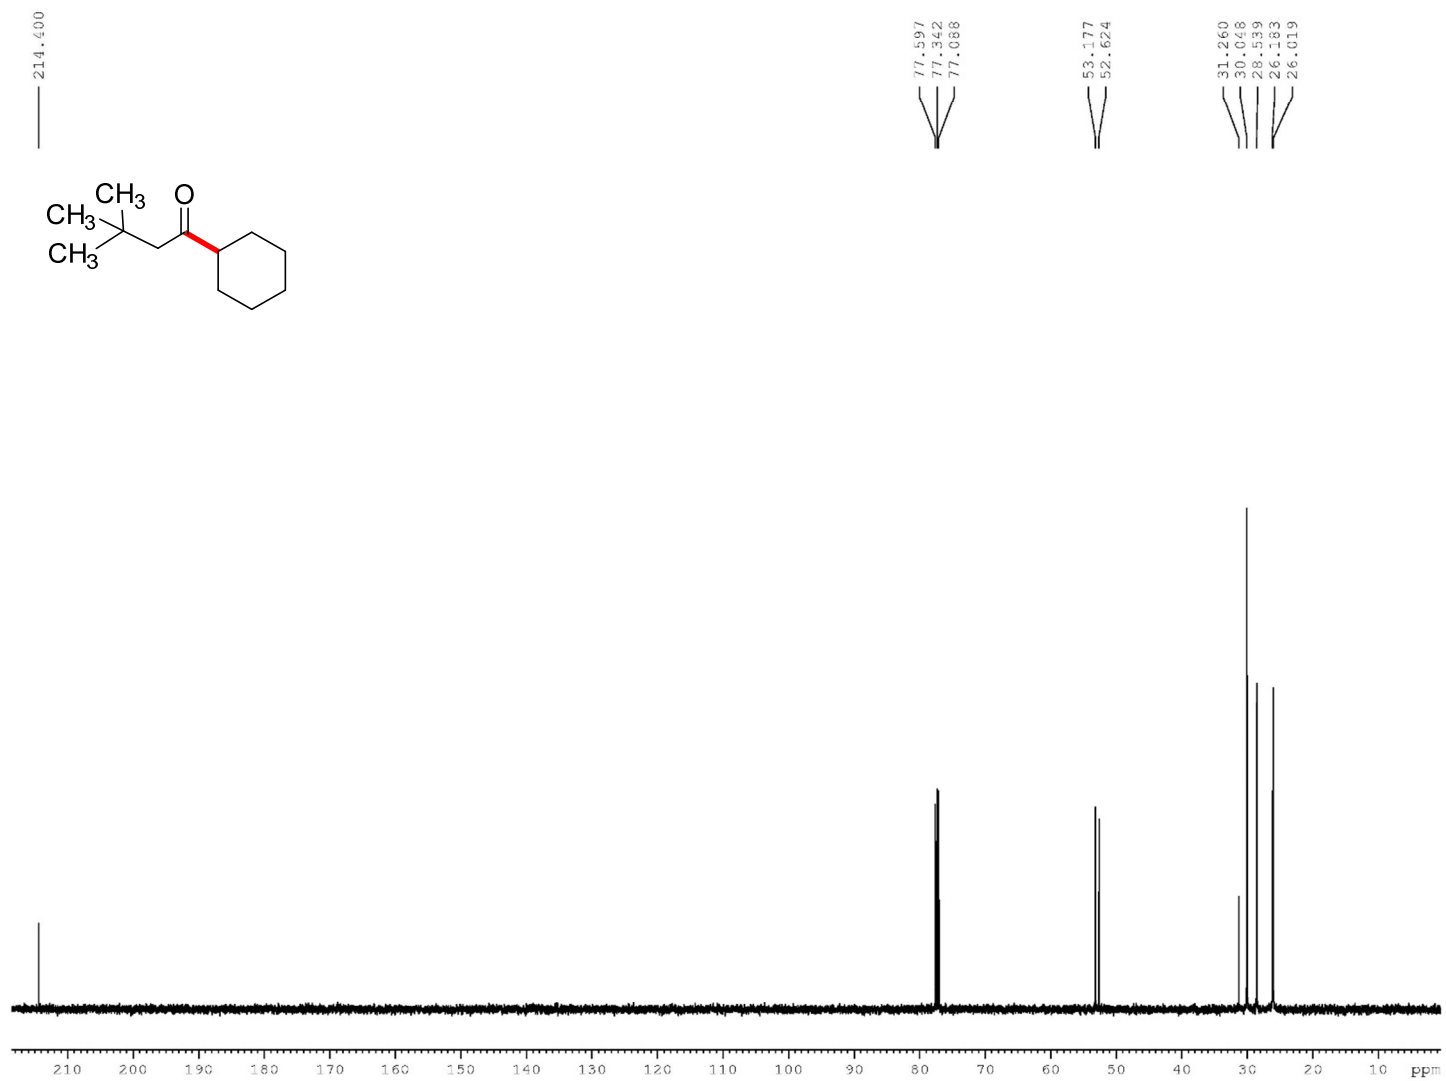

<sup>13</sup>C NMR (125.8 MHz, CDCl<sub>3</sub>) Spectrum of 1-Cyclohexyl-3,3-dimethylbutan-1-one (2e)

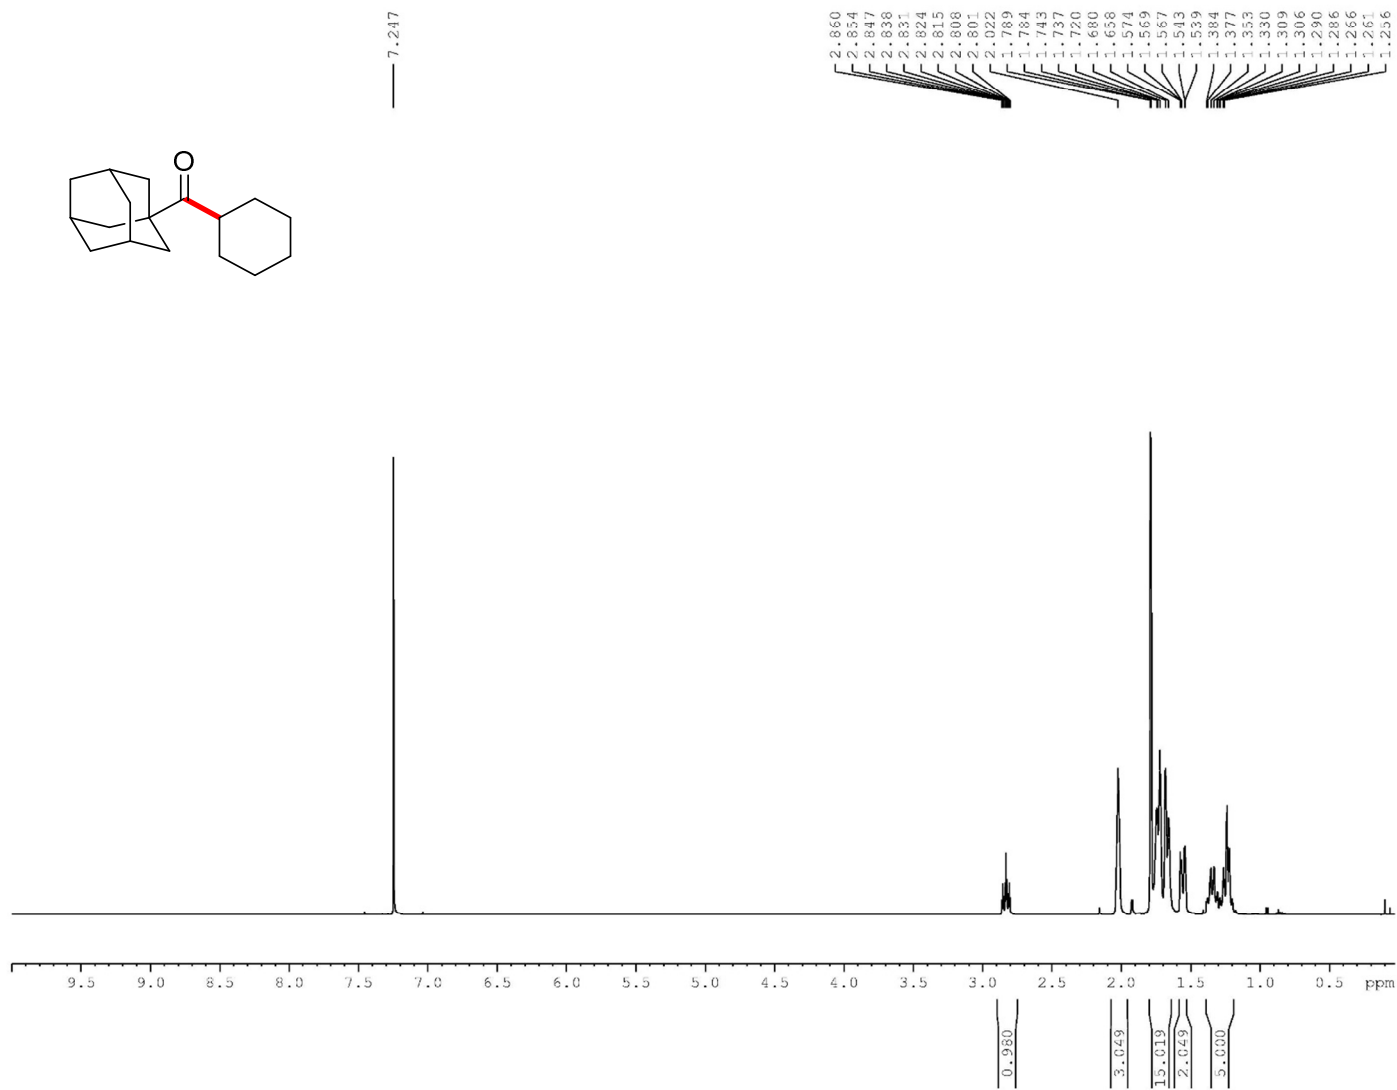

**<sup>1</sup>H NMR (500 MHz, CDCl<sub>3</sub>) Spectrum of (Adamantan-1-yl)(cyclohexyl)methanone (2f)**

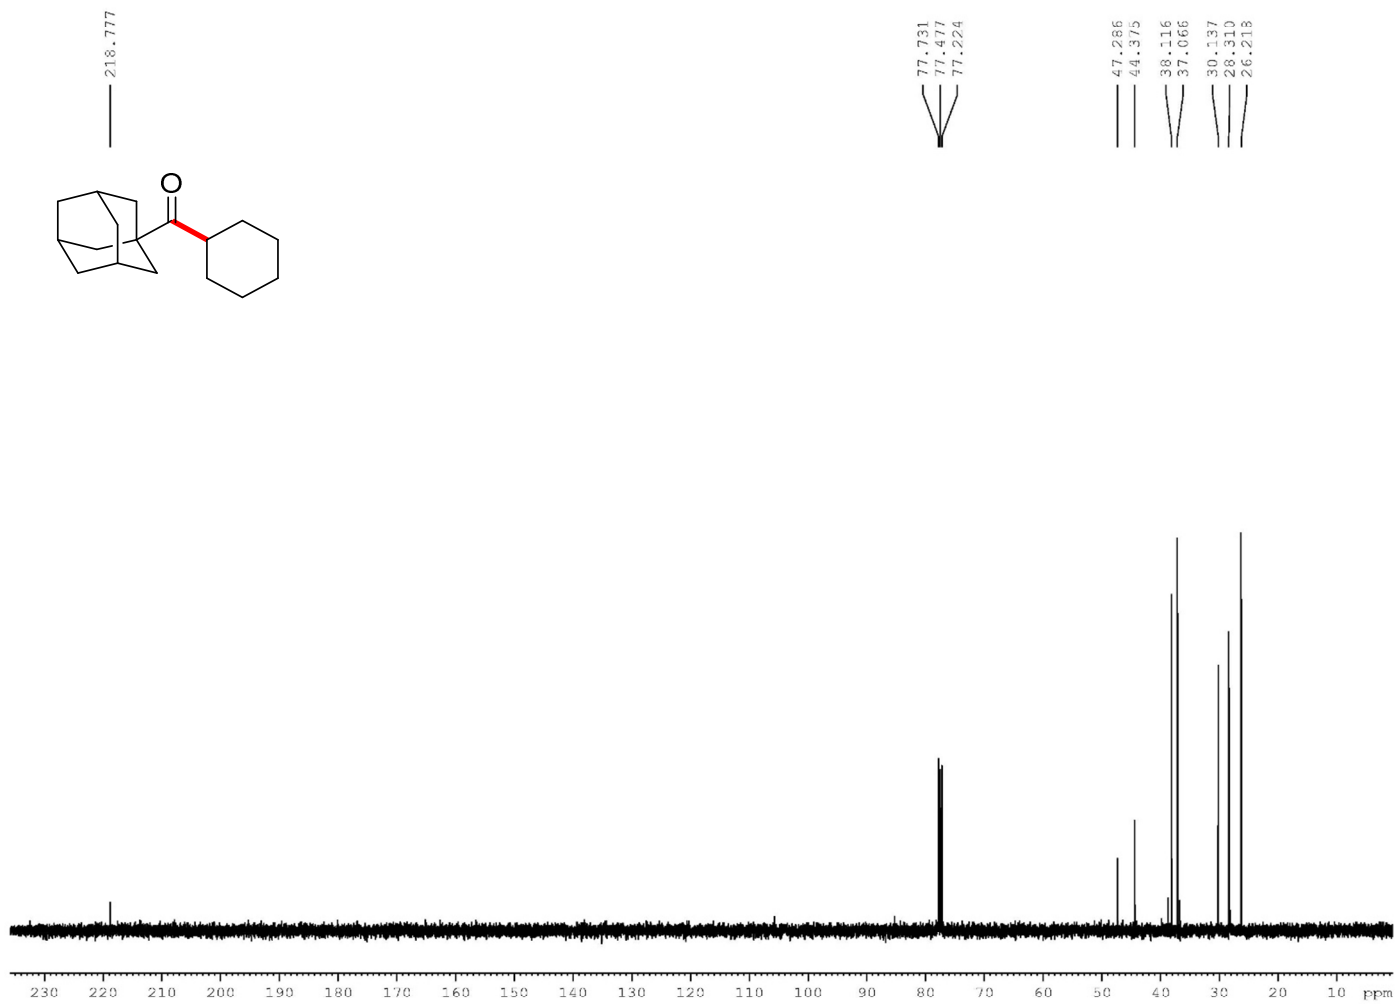

<sup>13</sup>C NMR (125.8 MHz, CDCl<sub>3</sub>) Spectrum of (Adamantan-1-yl)(cyclohexyl)methanone (2f)

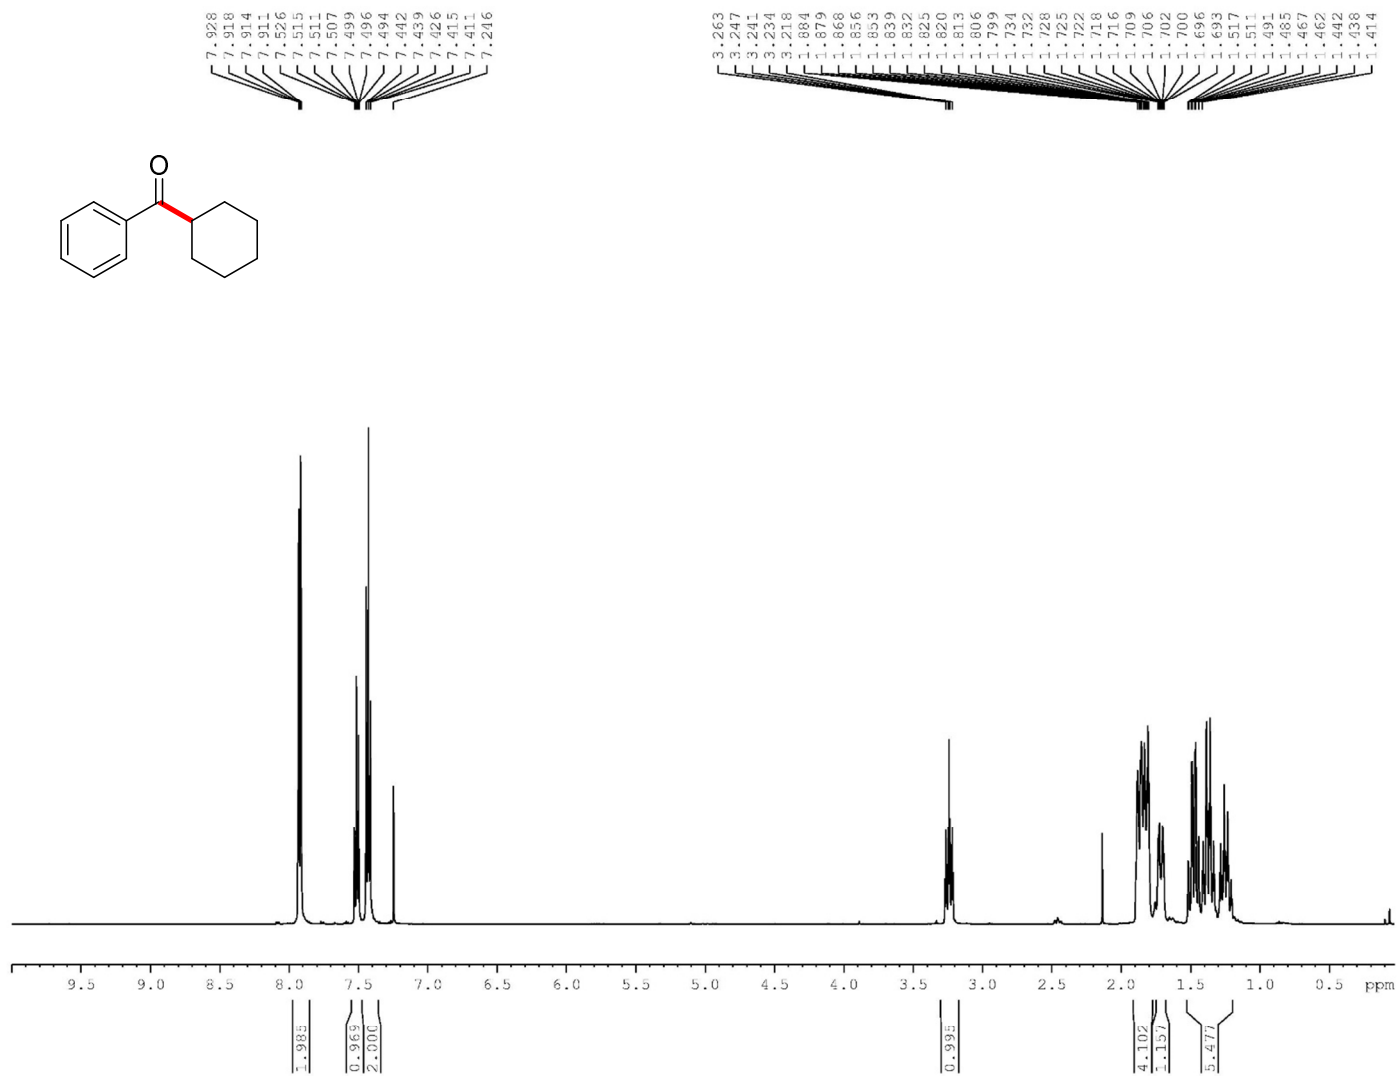

<sup>1</sup>H NMR (500 MHz, CDCl<sub>3</sub>) Spectrum of Cyclohexyl(phenyl)methanone (2g)



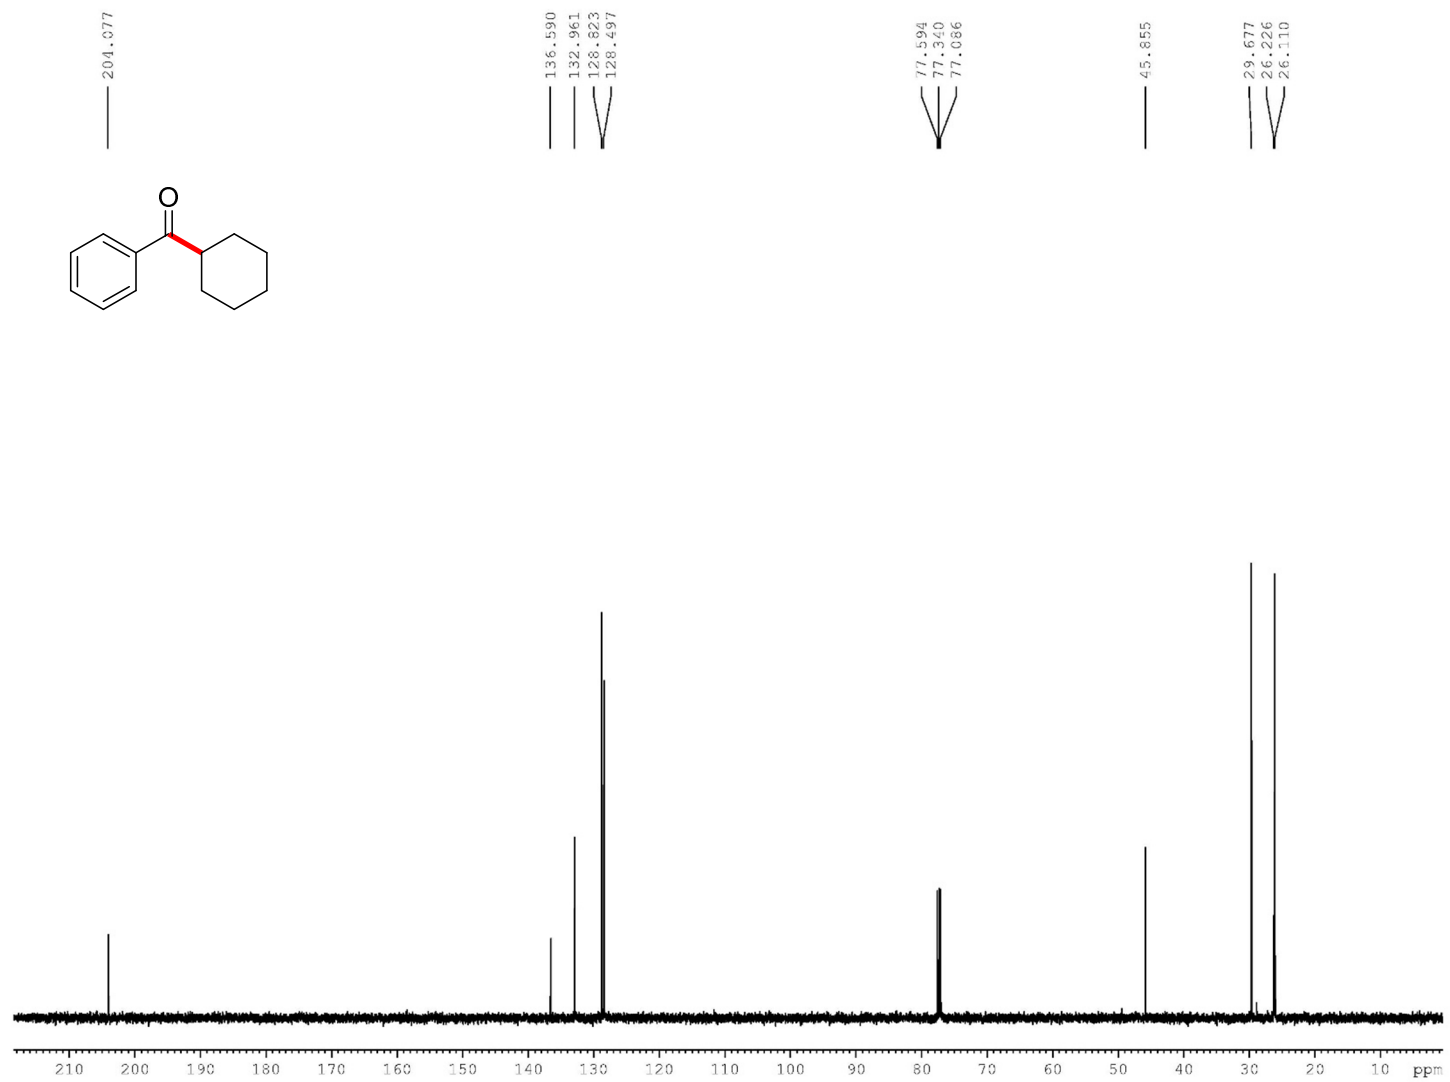

<sup>13</sup>C NMR (125.8 MHz, CDCl<sub>3</sub>) Spectrum of Cyclohexyl(phenyl)methanone (2g)

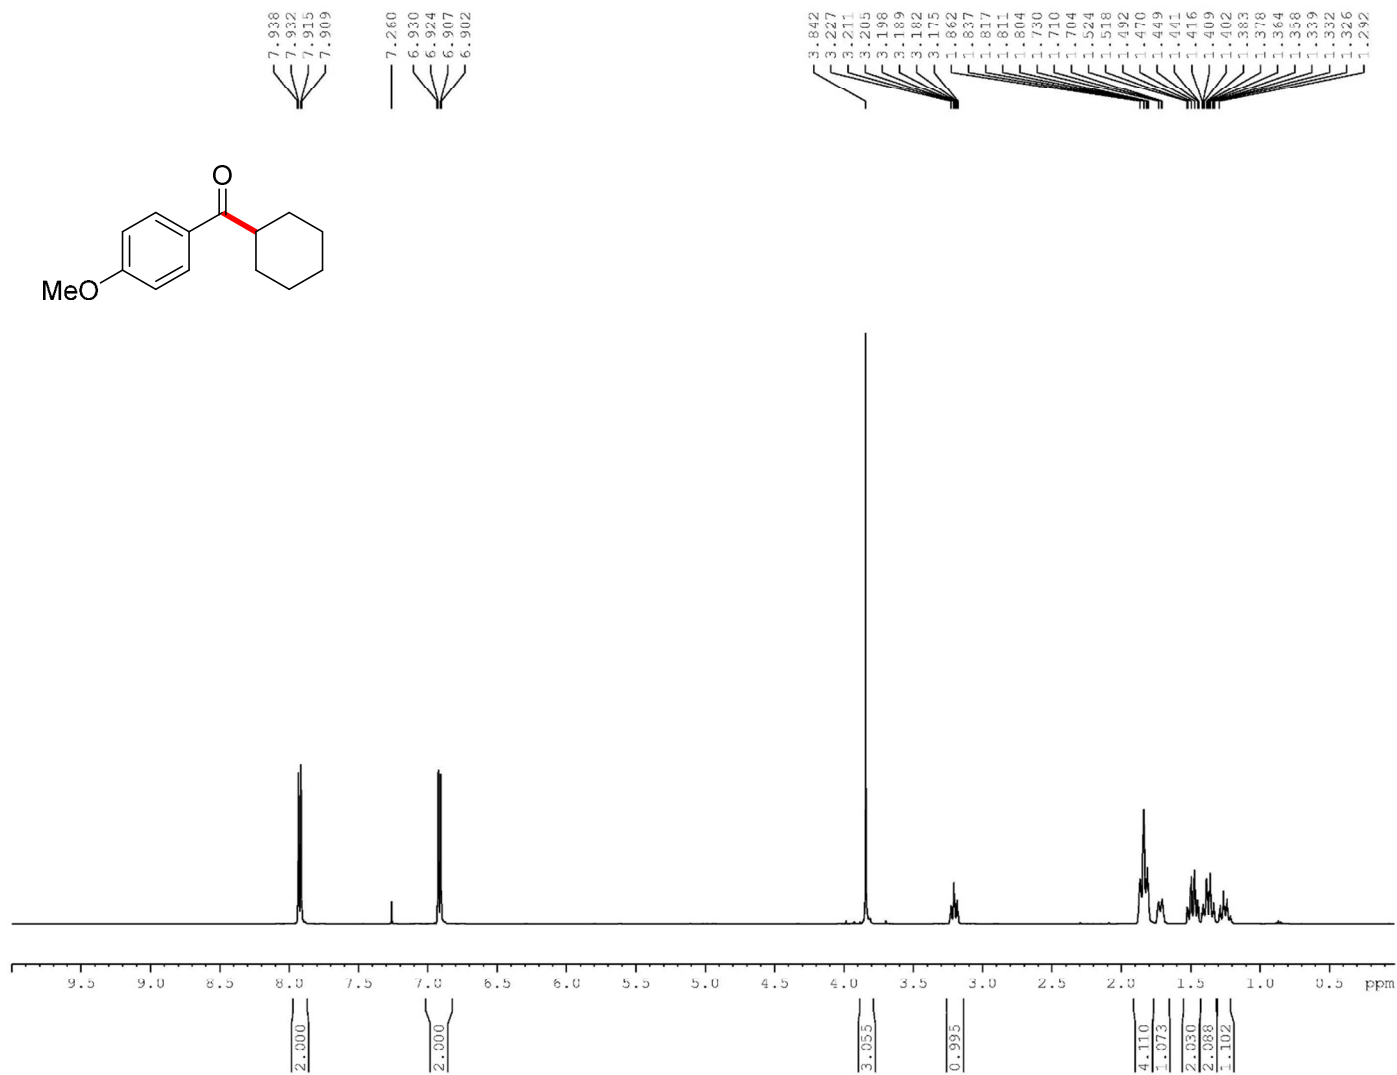

<sup>1</sup>H NMR (500 MHz, CDCl<sub>3</sub>) Spectrum of Cyclohexyl(4-methoxyphenyl)methanone (2h)

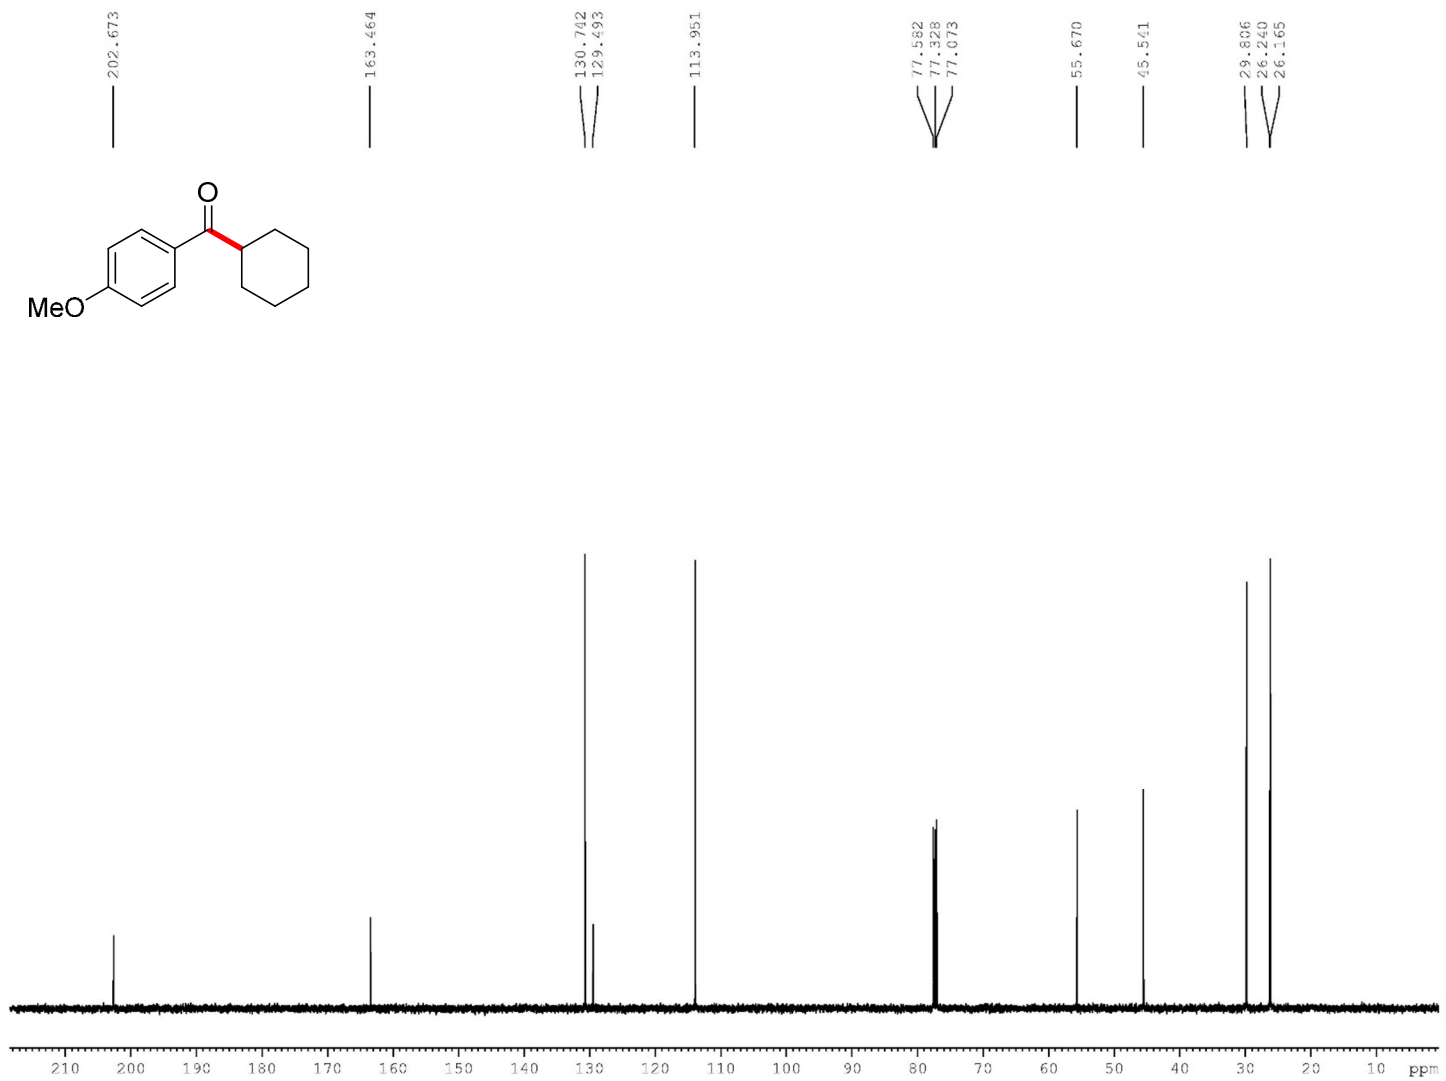

<sup>13</sup>C NMR (125.8 MHz, CDCl<sub>3</sub>) Spectrum of Cyclohexyl(4-methoxyphenyl)methanone (2h)

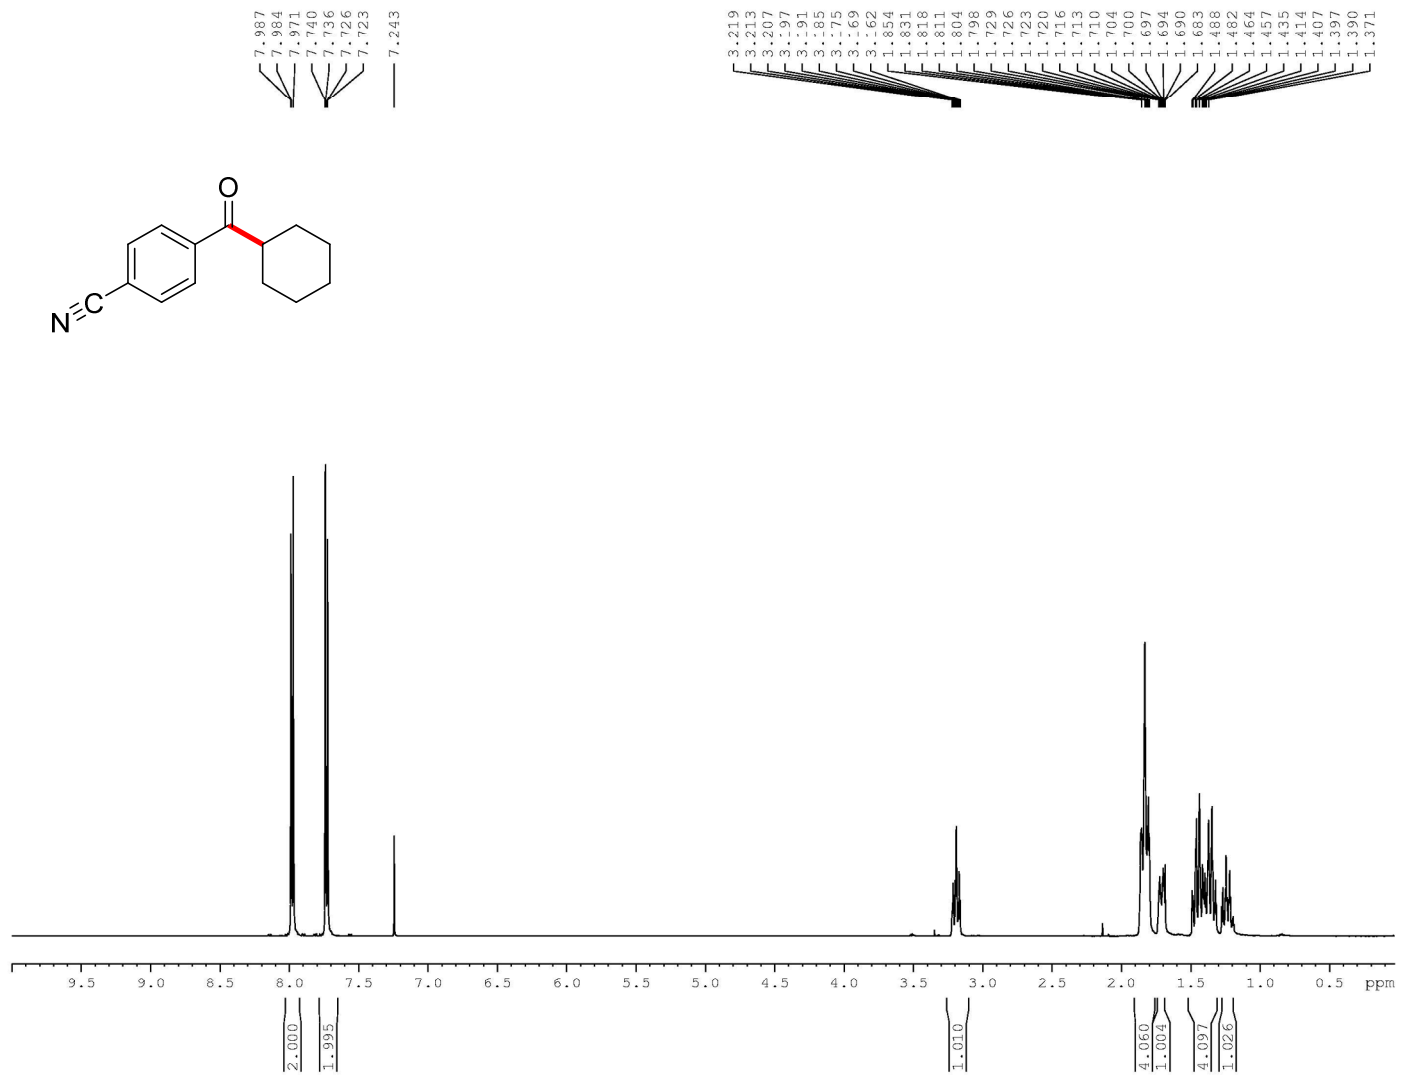

**<sup>1</sup>H NMR (500 MHz, CDCl<sub>3</sub>) Spectrum of 4-(Cyclohexanecarbonyl)benzonitrile (2i)**

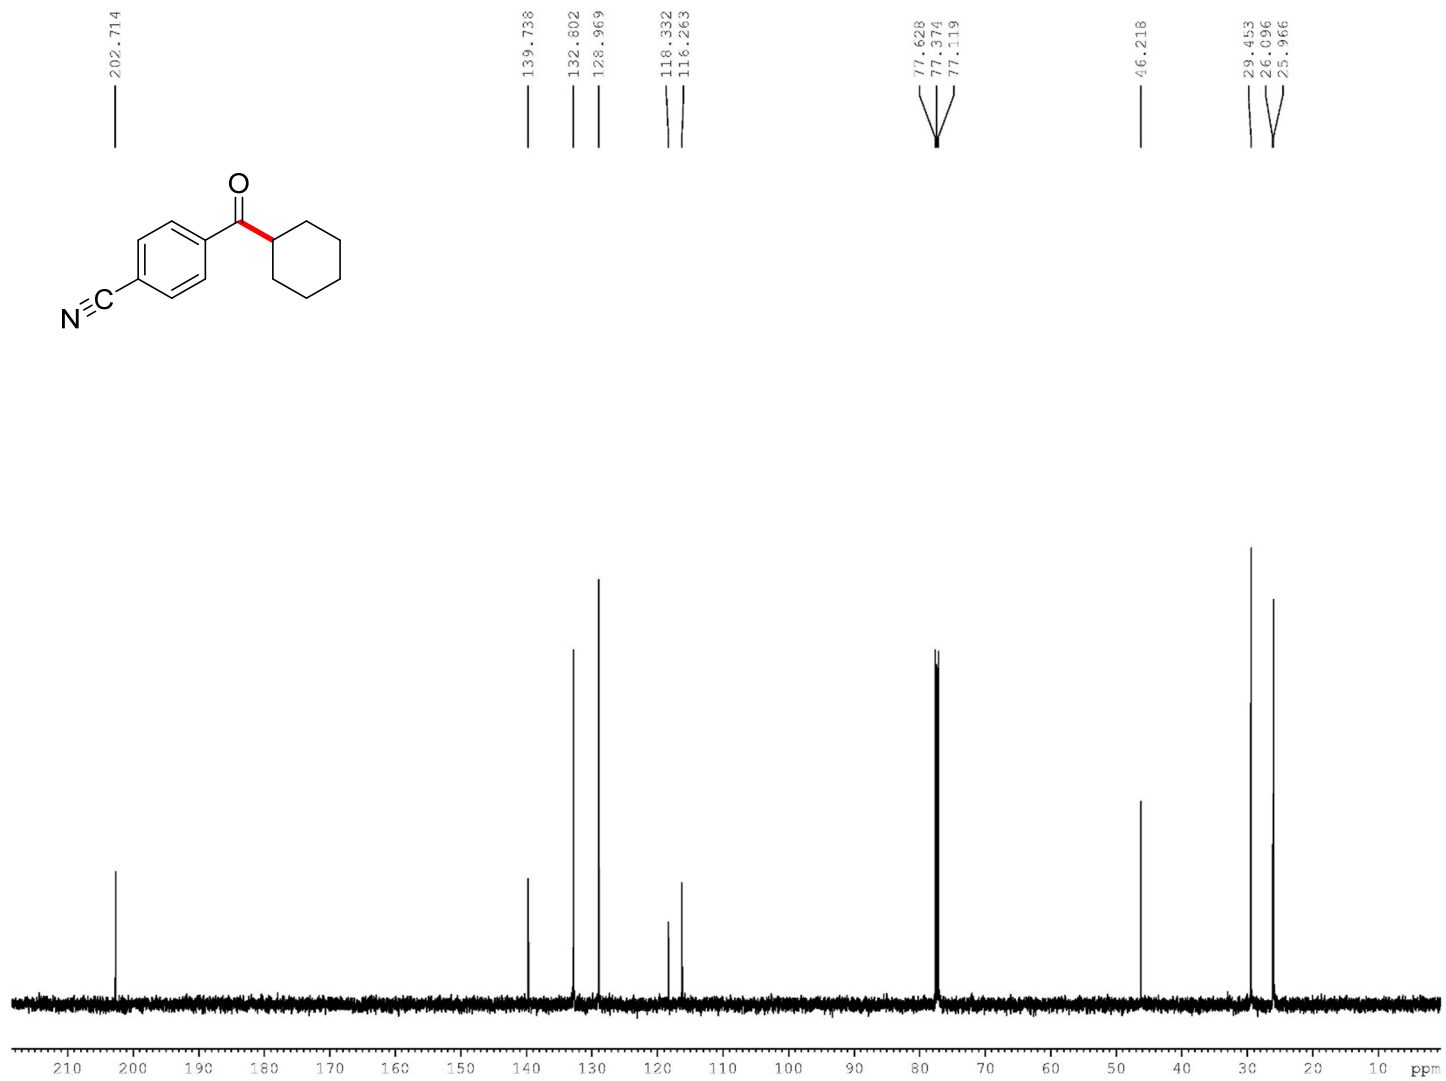

$^{13}\text{C}$  NMR (125.8 MHz,  $\text{CDCl}_3$ ) Spectrum of 4-(Cyclohexanecarbonyl)benzotrile (2i)

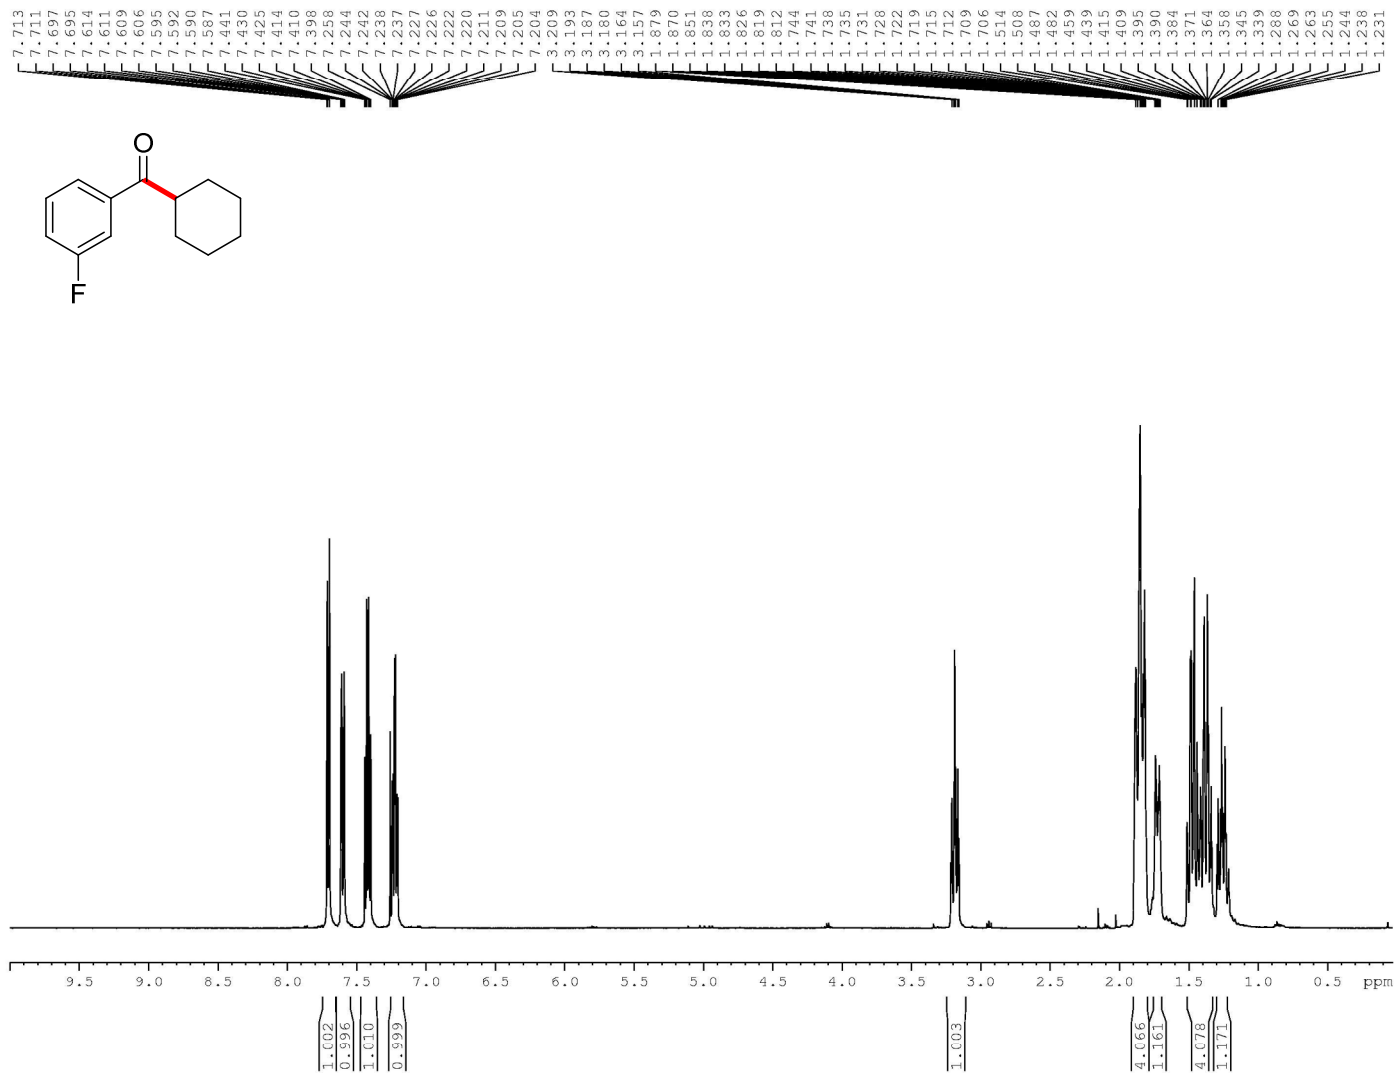

**<sup>1</sup>H NMR (500 MHz, CDCl<sub>3</sub>) Spectrum of Cyclohexyl(3-fluorophenyl)methanone (2j)**

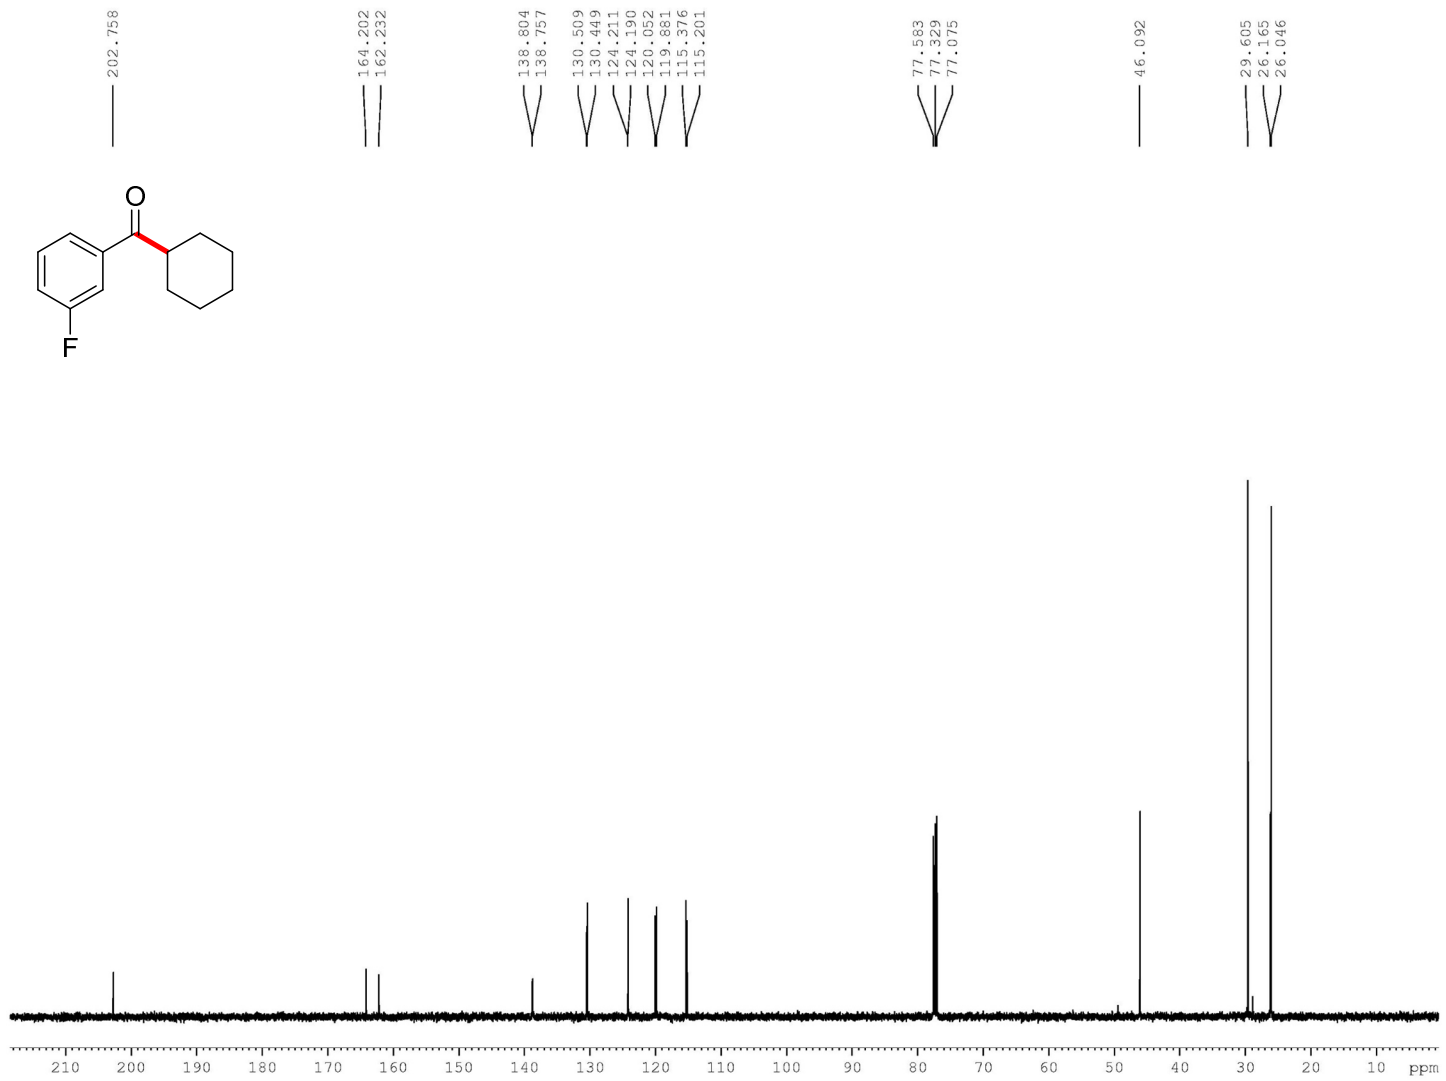

<sup>13</sup>C NMR (125.8 MHz, CDCl<sub>3</sub>) Spectrum of Cyclohexyl(3-fluorophenyl)methanone (2j)

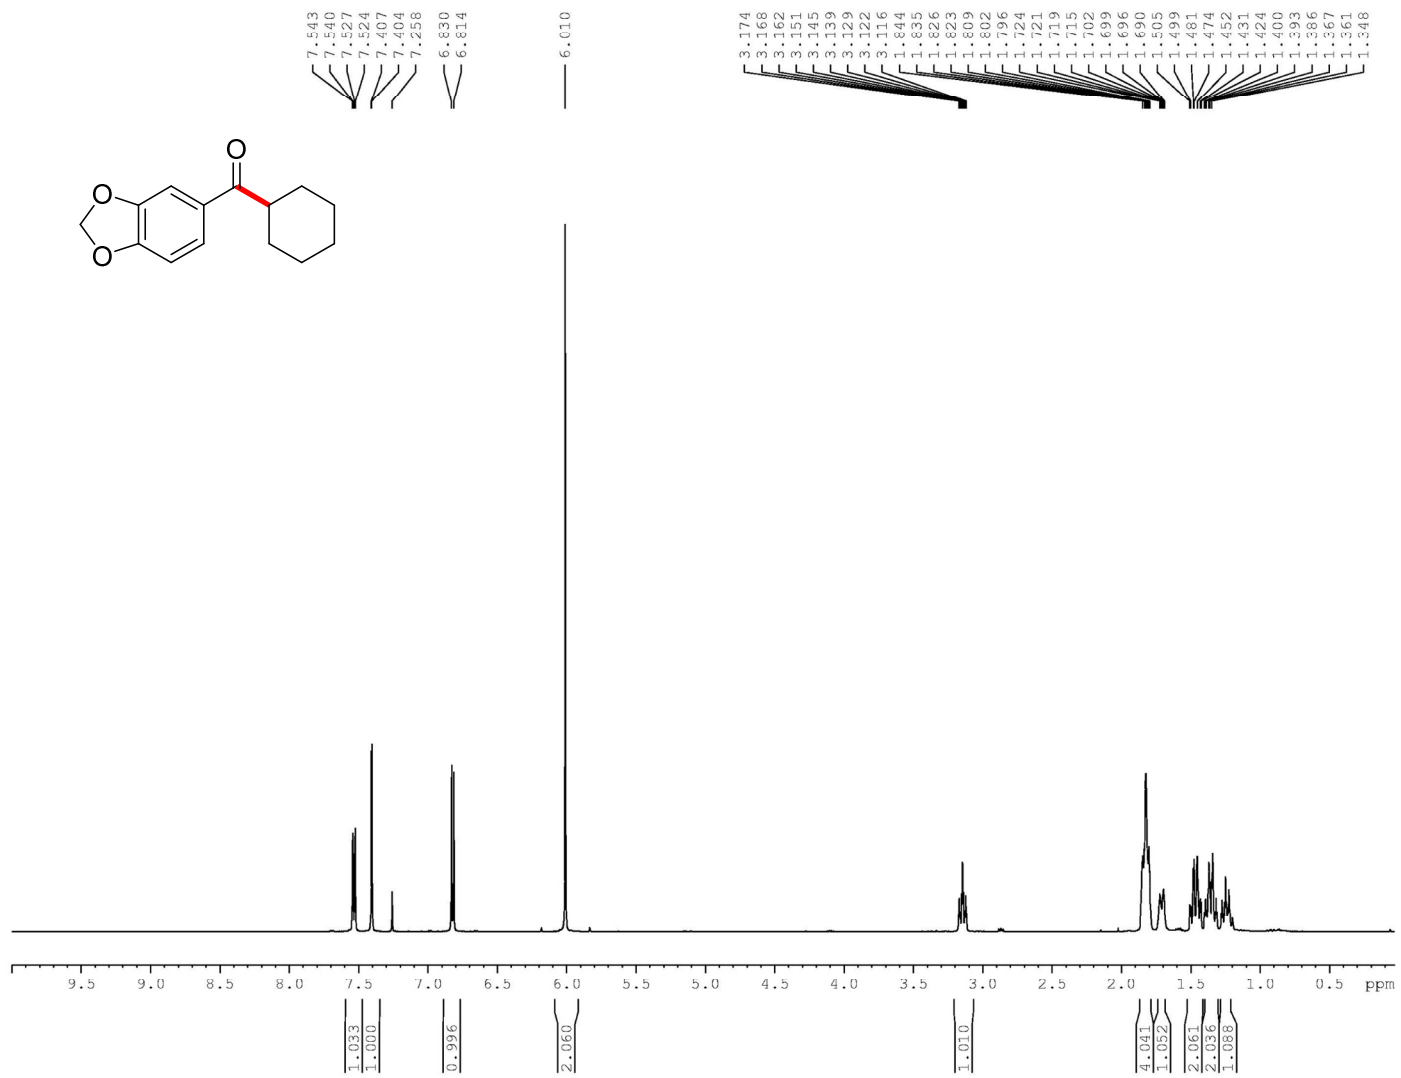

<sup>1</sup>H NMR (500 MHz, CDCl<sub>3</sub>) Spectrum of Benzo[d][1,3]dioxol-5-yl(cyclohexyl)methanone (2k)



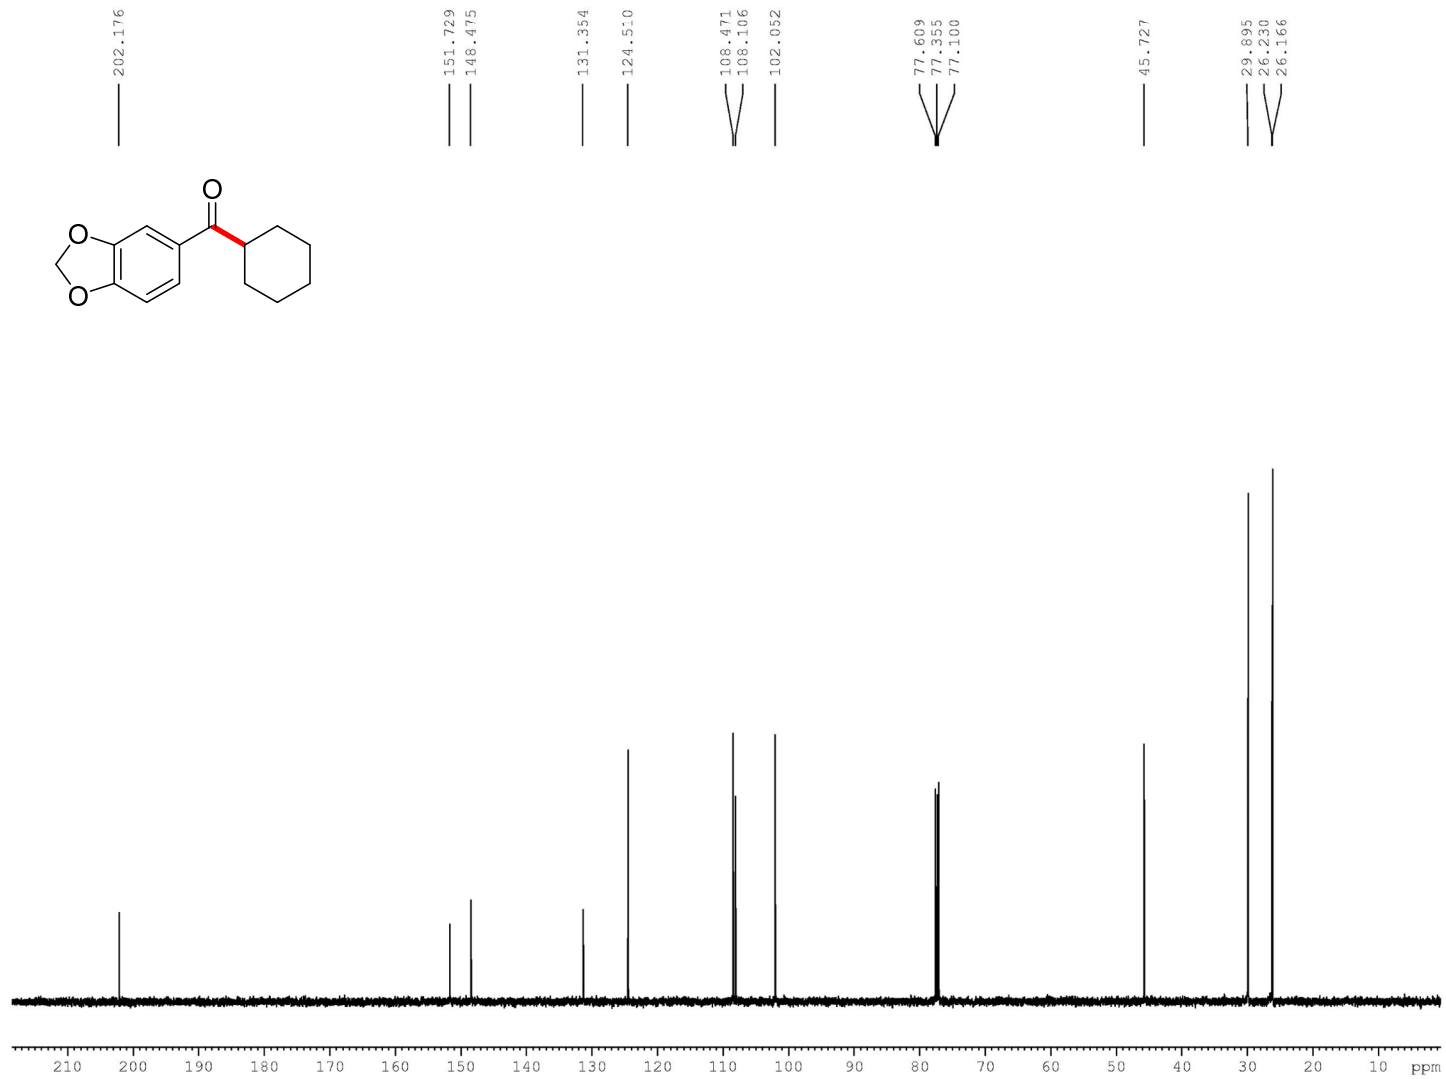

<sup>13</sup>C NMR (125.8 MHz, CDCl<sub>3</sub>) Spectrum of Benzo[d][1,3]dioxol-5-yl(cyclohexyl)methanone (2k)

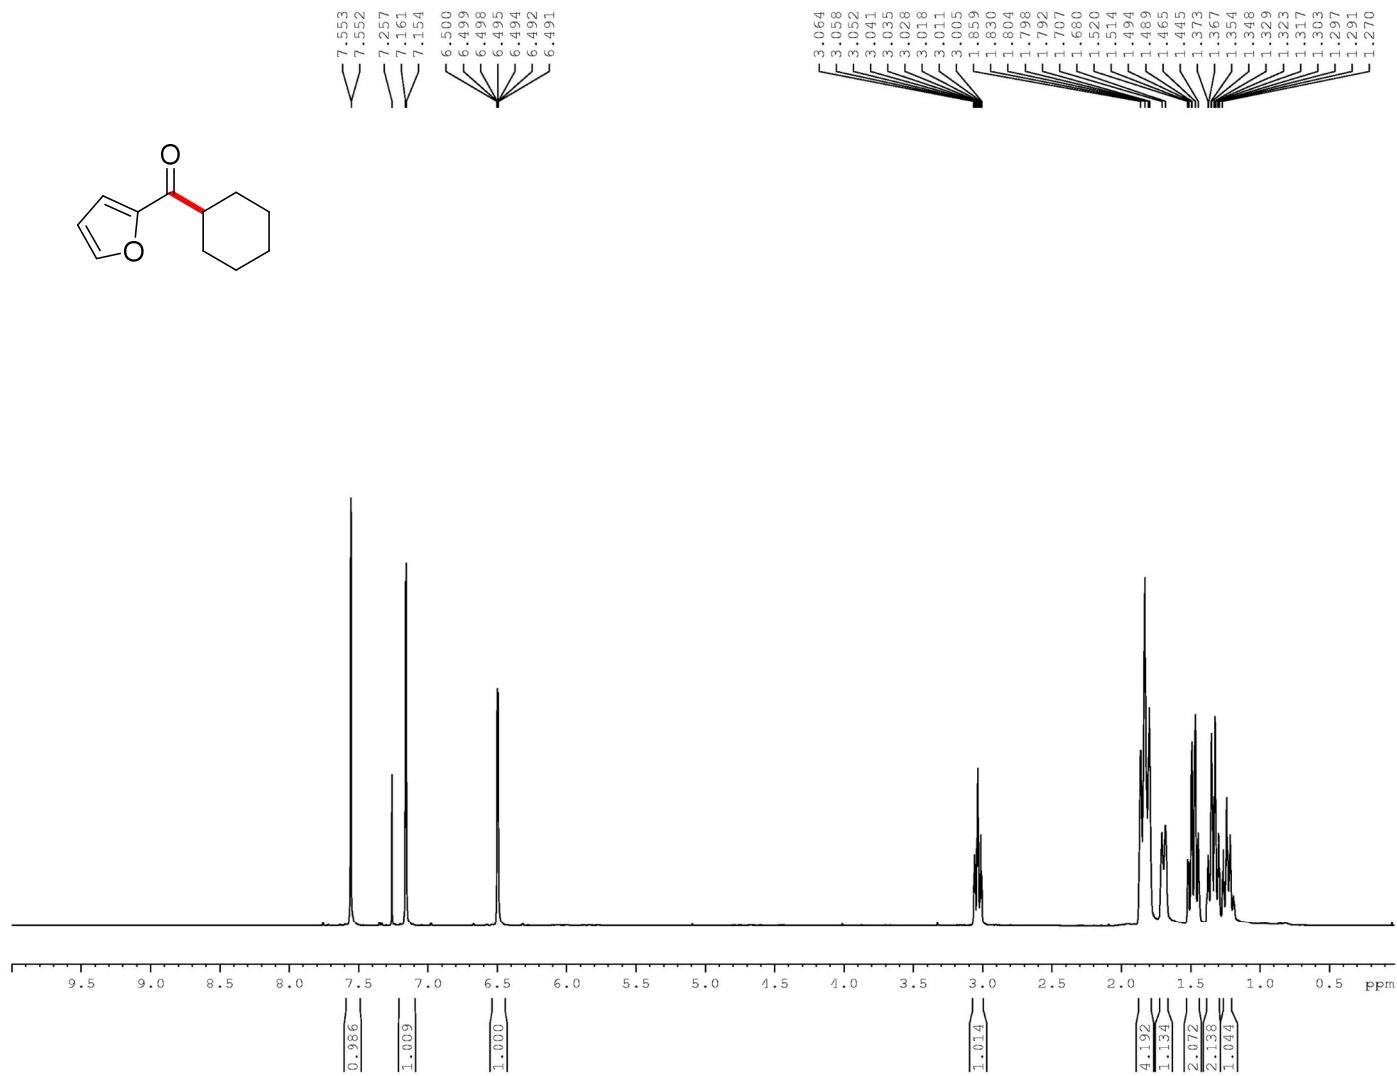

<sup>1</sup>H NMR (500 MHz, CDCl<sub>3</sub>) Spectrum of Cyclohexyl(furan-2-yl)methanone (2l)

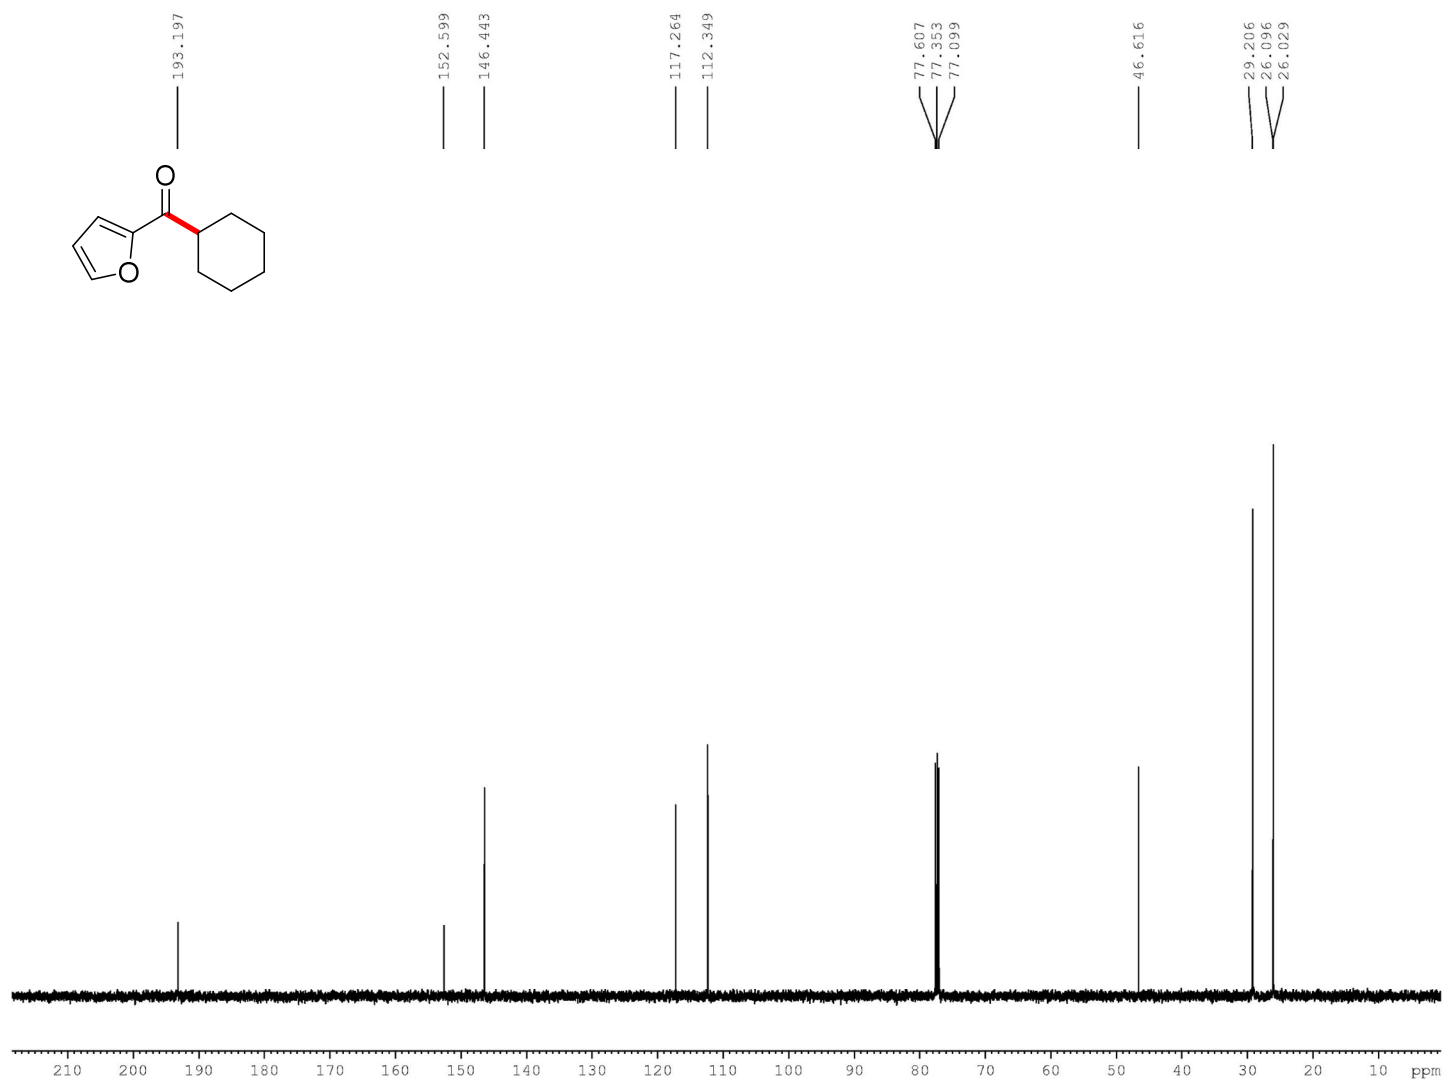

<sup>13</sup>C NMR (125.8 MHz, CDCl<sub>3</sub>) Spectrum of Cyclohexyl(furan-2-yl)methanone (2l)

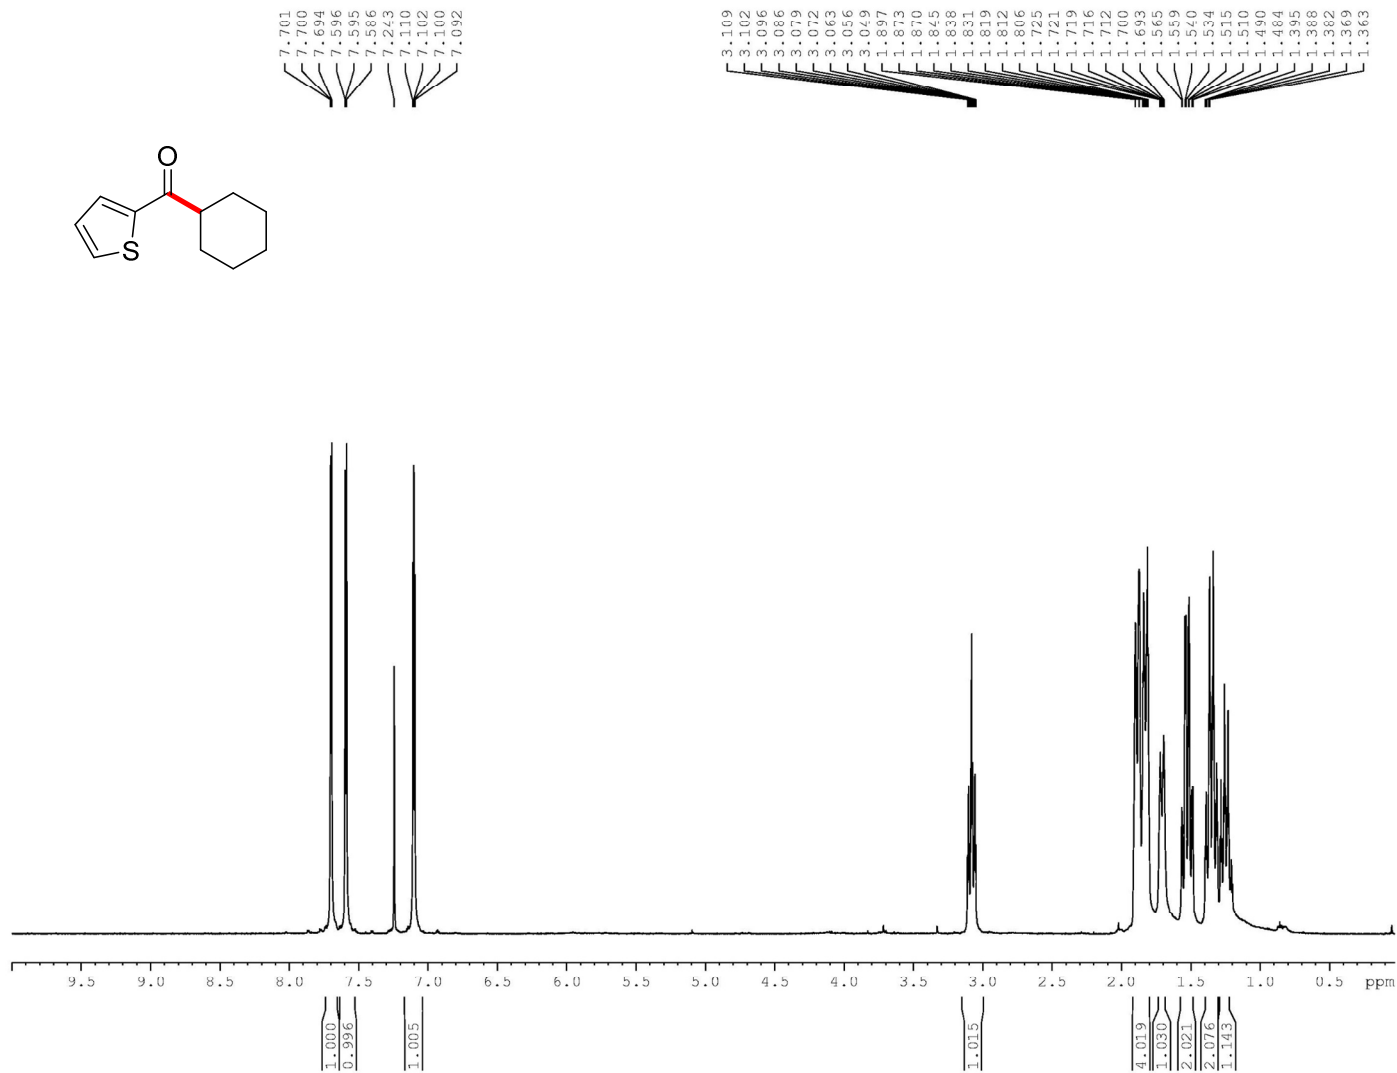

<sup>1</sup>H NMR (500 MHz, CDCl<sub>3</sub>) Spectrum of Cyclohexyl(thiophen-2-yl)methanone (2m)

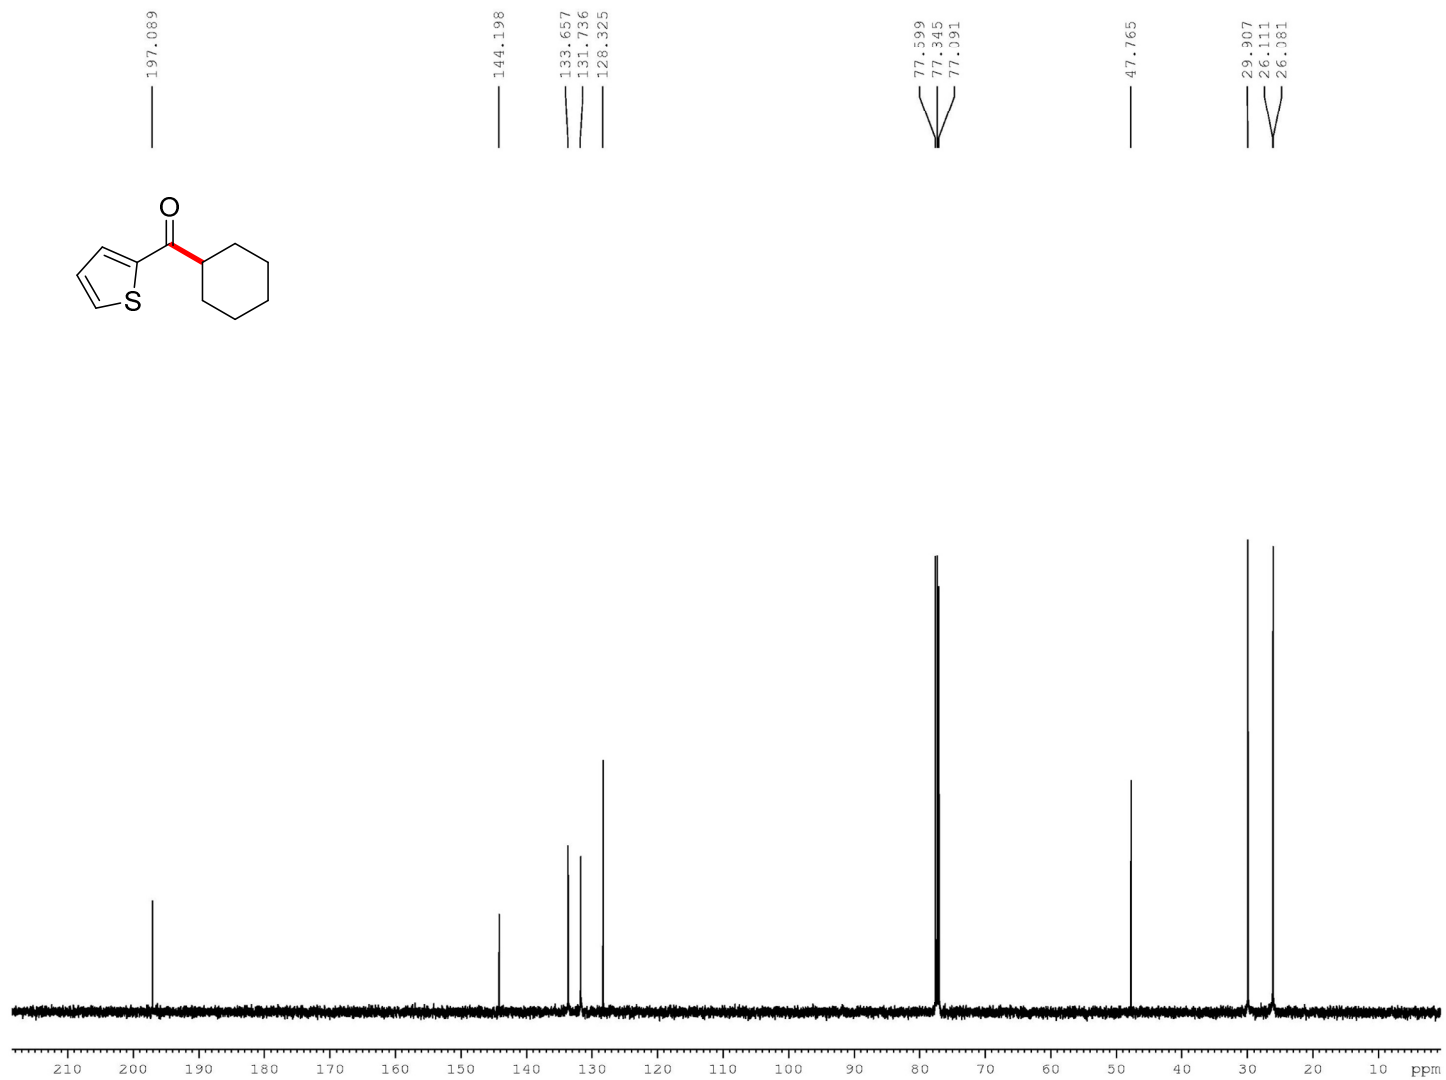

<sup>13</sup>C NMR (125.8 MHz, CDCl<sub>3</sub>) Spectrum of Cyclohexyl(thiophen-2-yl)methanone (2m)

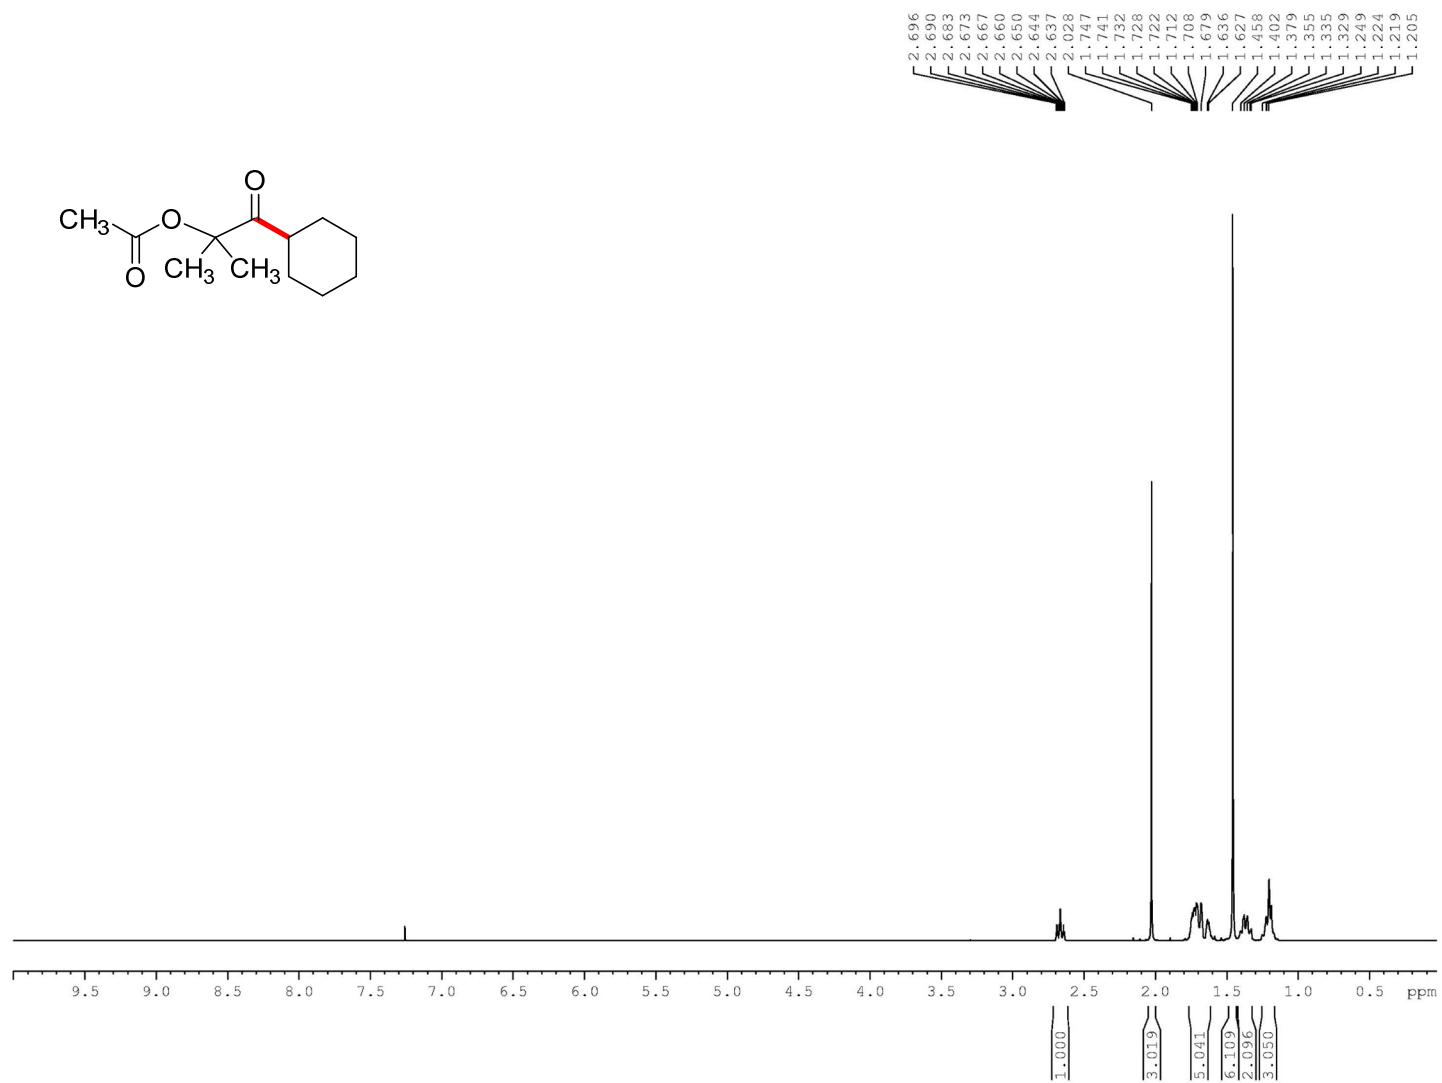

<sup>1</sup>H NMR (500 MHz, CDCl<sub>3</sub>) Spectrum of 1-Cyclohexyl-2-methyl-1-oxopropan-2-yl acetate (2n)

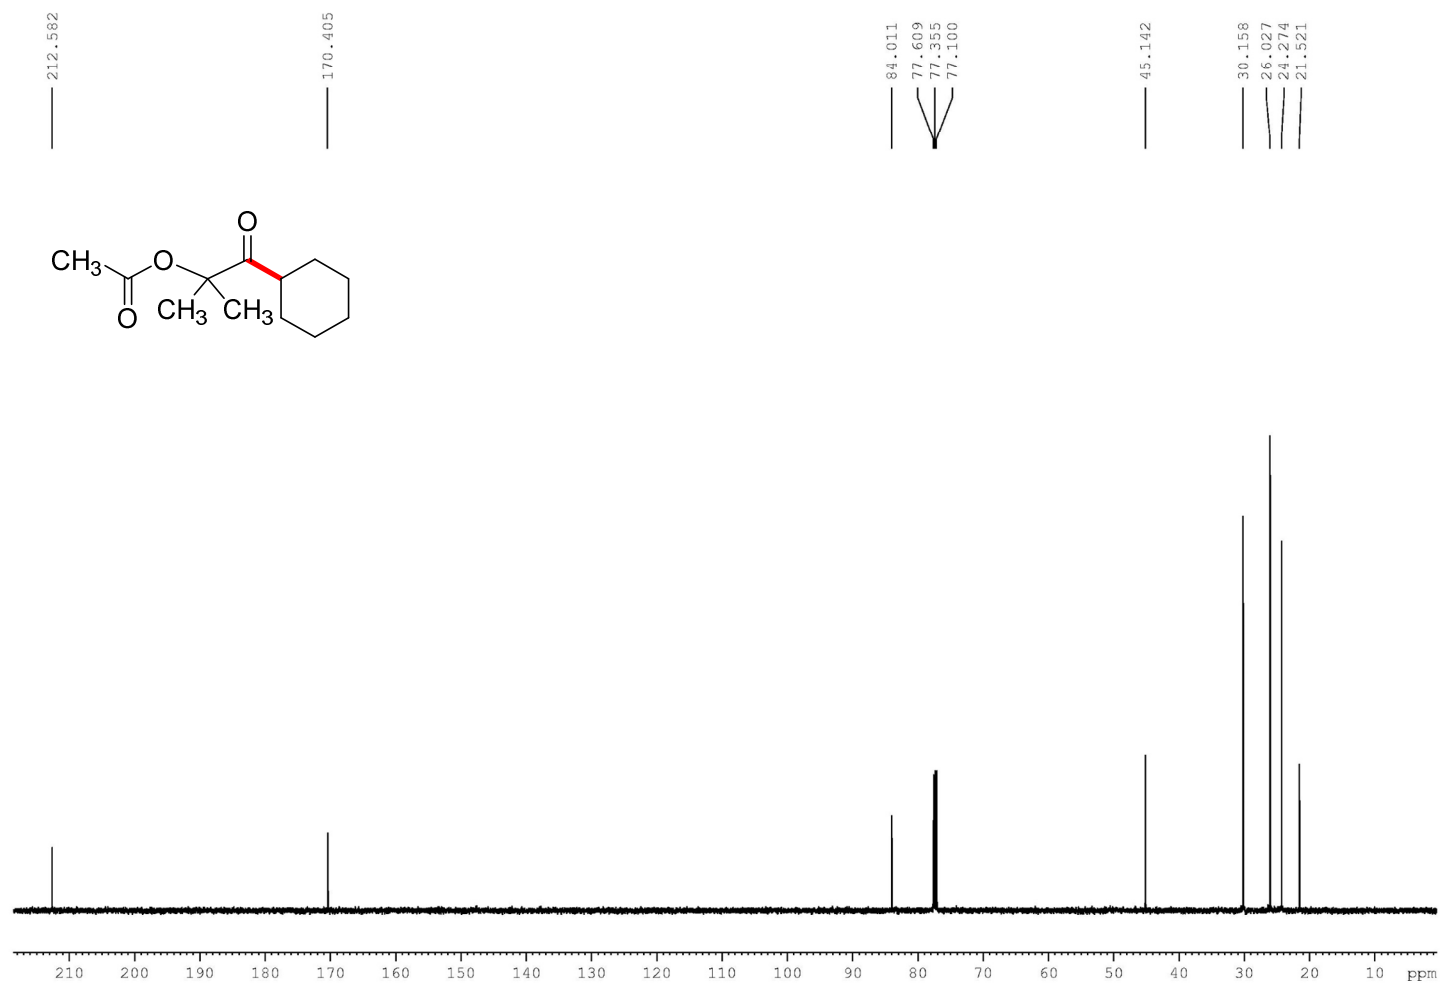

<sup>13</sup>C NMR (125.8 MHz, CDCl<sub>3</sub>) Spectrum of 1-Cyclohexyl-2-methyl-1-oxopropan-2-yl acetate (2n)

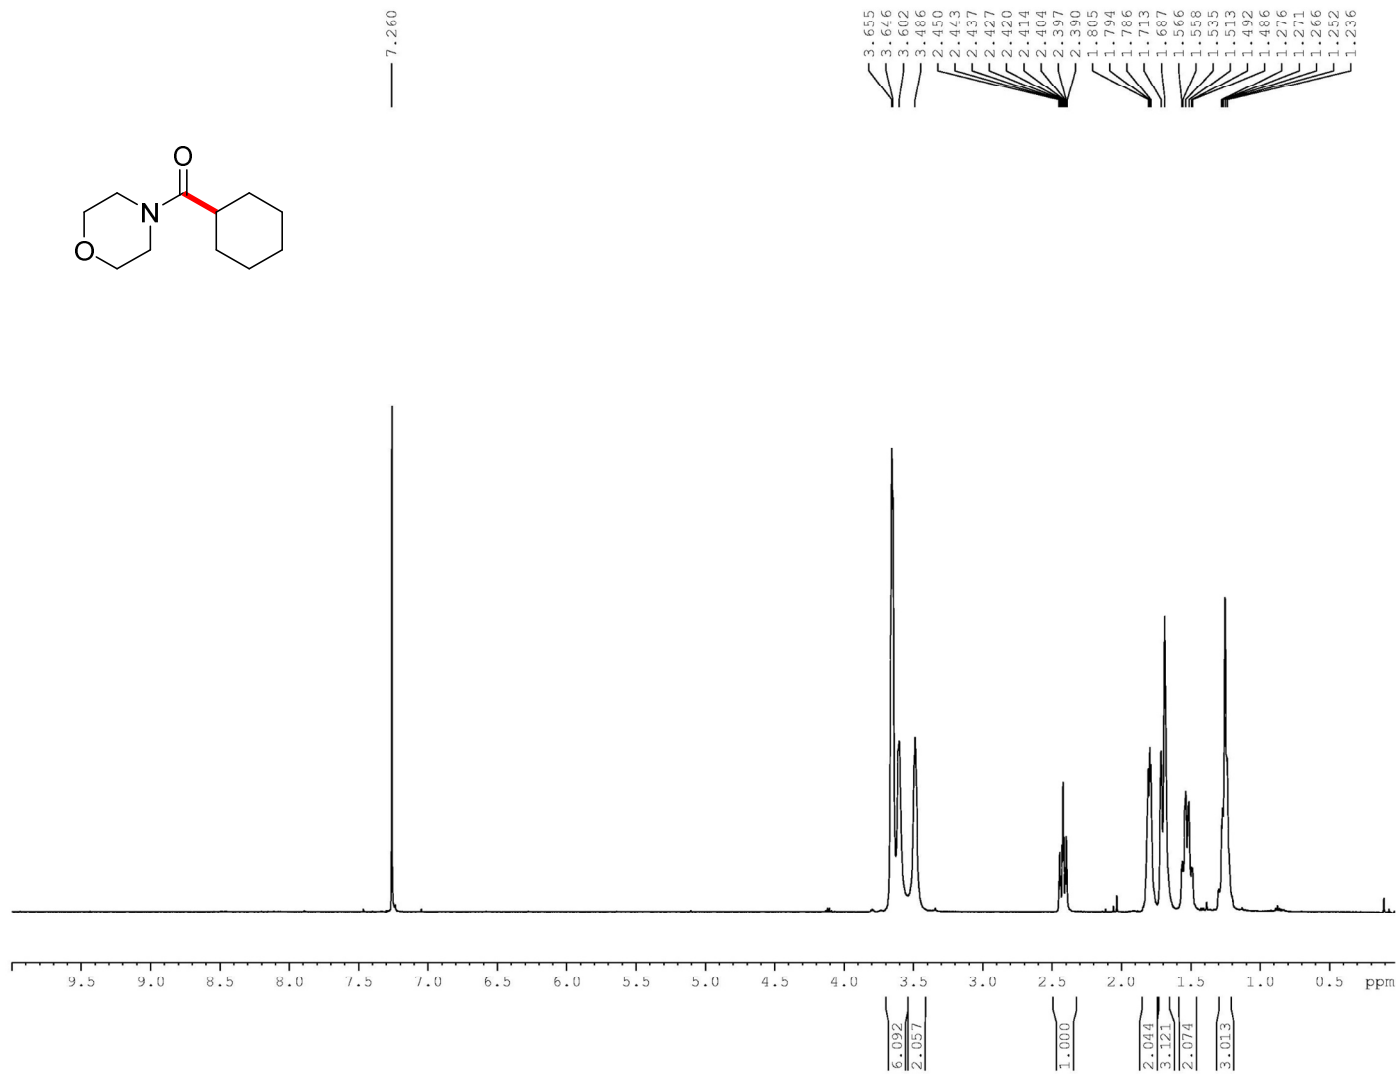

<sup>1</sup>H NMR (500 MHz, CDCl<sub>3</sub>) Spectrum of Cyclohexyl(morpholino)methanone (20)



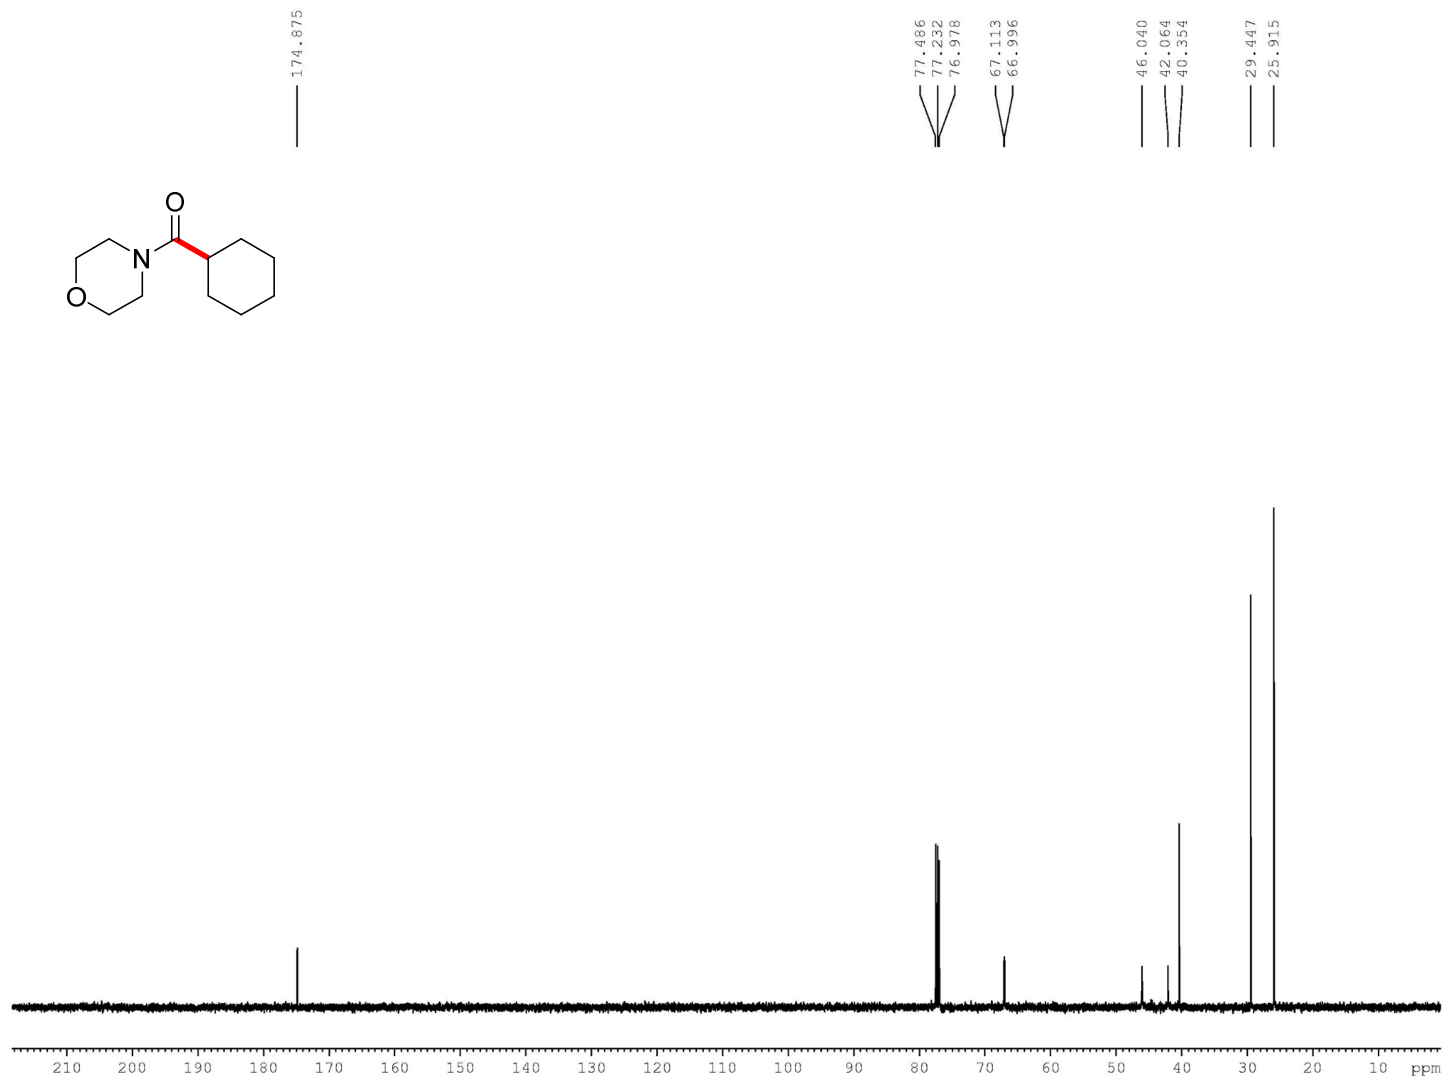

<sup>13</sup>C NMR (125.8 MHz, CDCl<sub>3</sub>) Spectrum of Cyclohexyl(morpholino)methanone (2o)
